# Supplementary material
Source: Research Square preprint supplement (doi:10.21203/rs.3.rs-9184188/v1)
Supplement: Supplementary file 1 [file 40f4f817e535e0e211c0a2eb.pdf]

# Supplementary Information for A universal law for non-breaking surface wave decay

Guoqiang Liu<sup>1,\*</sup> and Maryam Al Alshehhi<sup>1</sup>

<sup>1</sup>*Civil, Infrastructural and Environmental Engineering,  
Khalifa University of Science and Technology, Abu Dhabi, United Arab Emirates*

*\*Corresponding author: [guoqiang.liu@ku.ac.ae](mailto:guoqiang.liu@ku.ac.ae)*

## Contents

|           |                                                                                                                 |           |
|-----------|-----------------------------------------------------------------------------------------------------------------|-----------|
| <b>S1</b> | <b>From Navier-Stokes to the stochastic vortex force</b>                                                        | <b>3</b>  |
|           | A Incompressible Navier-Stokes equations and Helmholtz decomposition . . . . .                                  | 3         |
|           | B Orbital vortex force and its energetic role . . . . .                                                         | 4         |
|           | C Wave-phase averaging, Stokes drift and gradient equivalence . . . . .                                         | 4         |
|           | D Three-layer vorticity decomposition and the McWilliams identity . . . . .                                     | 6         |
|           | E Identification of the stochastic vortex force . . . . .                                                       | 8         |
| <b>S2</b> | <b>Non-negativity of the Green-Kubo damping coefficient</b>                                                     | <b>10</b> |
|           | A Assumptions A1-A6 . . . . .                                                                                   | 10        |
|           | B Non-equilibrium steady states and FDR-II . . . . .                                                            | 13        |
|           | C Operational construction of the reference measure . . . . .                                                   | 13        |
|           | D Time-scale separation and local validity . . . . .                                                            | 15        |
|           | E Projected dynamics and identification of the stochastic vortex force . . . . .                                | 15        |
|           | F Green-Kubo relation and non-negativity of $\Gamma$ . . . . .                                                  | 17        |
|           | G Markovian limit and monotonic energy decay . . . . .                                                          | 18        |
|           | H Dual-line prediction structure . . . . .                                                                      | 19        |
|           | I Physical origin of irreversibility: the single wave-eddy encounter . . . . .                                  | 19        |
| <b>S3</b> | <b>Evaluating the force autocorrelation in wavenumber space</b>                                                 | <b>21</b> |
|           | A The Green-Kubo starting point . . . . .                                                                       | 21        |
|           | B Force autocorrelation in wavenumber-frequency space . . . . .                                                 | 22        |
|           | C Vortex-force vertex and angular integration . . . . .                                                         | 23        |
|           | D Scale-selection window . . . . .                                                                              | 24        |
|           | E Frequency integration and the effective correlation time . . . . .                                            | 25        |
|           | F Reduced one-dimensional integral and modal normalisation . . . . .                                            | 26        |
| <b>S4</b> | <b>From the force autocorrelation to the swell attenuation law</b>                                              | <b>27</b> |
| <b>S5</b> | <b>Order-of-magnitude of the prefactor <math>C_{\text{tot}}</math> and robustness of the Kolmogorov closure</b> | <b>28</b> |
|           | A The geometric vertex factor $\tilde{G}_{\text{geom}}$ . . . . .                                               | 28        |
|           | B The scale-selection constant $C_S$ . . . . .                                                                  | 30        |
|           | C The advective correlation factor $C_T$ . . . . .                                                              | 31        |
|           | D The vertical-weighting factor $C_E$ . . . . .                                                                 | 32        |
|           | E Effective dissipation rate and numerical baseline . . . . .                                                   | 32        |
|           | F Self-consistency of window shape and dissipation profile . . . . .                                            | 34        |
|           | G Validity of Kolmogorov scaling at swell-selected eddy scales . . . . .                                        | 34        |
|           | H Assembly of the total prefactor . . . . .                                                                     | 35        |
| <b>S6</b> | <b>Random-walk theory and intrinsic variance closure</b>                                                        | <b>35</b> |

|           |                                                                                    |           |
|-----------|------------------------------------------------------------------------------------|-----------|
| A         | Random walk in logarithmic energy . . . . .                                        | 36        |
| B         | Variance renormalisation from inter-encounter correlations . . . . .               | 41        |
| C         | Signal-to-noise ratio and deterministic emergence scale . . . . .                  | 43        |
| D         | Variance decomposition and error budget . . . . .                                  | 45        |
| E         | Negative attenuation rates and discriminating tests . . . . .                      | 46        |
| <b>S7</b> | <b>Comparison with satellite observations</b>                                      | <b>47</b> |
| A         | Altimeter tracking dataset . . . . .                                               | 48        |
| B         | SAR tracking dataset . . . . .                                                     | 48        |
| C         | Variance budget and the Monte Carlo gap . . . . .                                  | 49        |
| D         | Fixed-design Monte Carlo validation of the inference layer . . . . .               | 50        |
| E         | Cross-dataset consistency . . . . .                                                | 51        |
| <b>S8</b> | <b>Amplitude independence of the attenuation rate</b>                              | <b>51</b> |
| <b>S9</b> | <b>Domain of validity: why remote swell isolates the universal dissipation law</b> | <b>53</b> |

## S1. From Navier-Stokes to the stochastic vortex force

We derive the stochastic vortex force (SVF) from the incompressible Navier-Stokes equations under the assumptions stated in the main text (bulk incompressible flow, non-breaking potential waves, negligible air-side friction). We work at leading order in the small wave slope and assume clear separation between the fast wave phase and the slower evolution of currents and turbulent vorticity.

### A. Incompressible Navier-Stokes equations and Helmholtz decomposition

Consider an incompressible Newtonian fluid of constant density  $\rho$ , neglecting buoyancy, stratification and surface tension. The total Eulerian velocity field  $\mathbf{U}(\mathbf{x}, t)$  satisfies

$$\partial_t \mathbf{U} + (\mathbf{U} \cdot \nabla) \mathbf{U} = -\frac{1}{\rho} \nabla P + \nu \nabla^2 \mathbf{U}, \quad \nabla \cdot \mathbf{U} = 0, \quad (\text{S.1})$$

where  $P$  is the mechanical pressure (including the hydrostatic contribution  $\rho g z$ , so that gravity does not appear explicitly) and  $\nu$  the kinematic viscosity. Following the Helmholtz theorem [1, 2], we decompose the total velocity into an irrotational wave part and a rotational part,

$$\mathbf{U}(\mathbf{x}, t) = \mathbf{u}_\phi(\mathbf{x}, t) + \mathbf{u}(\mathbf{x}, t), \quad (\text{S.2})$$

where  $\mathbf{u}_\phi = \nabla \phi$  solves the linear free-surface boundary-value problem for the surface-wave potential, and  $\mathbf{u}$  contains all rotational motions. For small-amplitude, non-breaking surface gravity waves, the potential approximation is standard [e.g. 3–5] and implies

$$\nabla \times \mathbf{u}_\phi \approx \mathbf{0}, \quad \nabla \cdot \mathbf{u}_\phi = 0 \quad (\text{in the bulk}). \quad (\text{S.3})$$

Since each component of  $\mathbf{u}_\phi = \nabla \phi$  satisfies the Laplace equation in the bulk,  $\nabla^2 \mathbf{u}_\phi = \nabla(\nabla^2 \phi) = \mathbf{0}$ . The bulk viscous term  $\nu \nabla^2 \mathbf{u}_\phi$  therefore vanishes in the interior and drops out of the subtraction below. (Viscous boundary-layer effects on the wave field—Lamb damping—are a separate, much weaker dissipation pathway that is negligible for remote swell and lies outside the present framework.)<sup>1</sup> Since  $\mathbf{u}_\phi = \nabla \phi$  is irrotational and divergence-free in the bulk, it satisfies the Euler equation for potential flow in the same pressure convention as Eq. (S.1),

$$\partial_t \mathbf{u}_\phi + (\mathbf{u}_\phi \cdot \nabla) \mathbf{u}_\phi = -\frac{1}{\rho} \nabla p^\varphi, \quad \nabla \cdot \mathbf{u}_\phi = 0, \quad (\text{S.4})$$

where  $p^\varphi$  is the irrotational pressure field in the bulk (equivalently,  $p^\varphi/\rho = -\partial_t \phi - \frac{1}{2} |\nabla \phi|^2$  via Bernoulli's relation, with gravity already absorbed into the pressure as in Eq. S.1). Substituting (S.2) into (S.1) and subtracting (S.4) eliminates both the irrotational self-advection  $\mathbf{u}_\phi \cdot \nabla \mathbf{u}_\phi$  and the irrotational pressure gradient, giving the governing equation for the rotational component in the bulk (cf. Eq. (2.5) of Xuan et al. 2. Boundary conditions are specified where energy budgets are taken),

$$\partial_t \mathbf{u} + (\mathbf{u} \cdot \nabla) \mathbf{u} = -\mathbf{u}_\phi \cdot \nabla \mathbf{u} - \mathbf{u} \cdot \nabla \mathbf{u}_\phi - \frac{1}{\rho} \nabla p + \nu \nabla^2 \mathbf{u}, \quad \nabla \cdot \mathbf{u} = 0, \quad (\text{S.5})$$

where  $p$  is the pressure associated with  $\mathbf{u}$  (defined up to an arbitrary function of time). The only approximations are incompressibility and the potential nature of the wave field (S.3).

<sup>1</sup>Throughout Sections S1–S4,  $z$  is measured upward with the free surface at  $z = 0$  ( $z \leq 0$  in the fluid, orbital decay  $\propto e^{kz}$ ). Section S5 switches to a depth-downward convention  $z \geq 0$ , giving kernels  $e^{-2kz}$ ; the switch is flagged where it occurs (Eq. S.141).

## B. Orbital vortex force and its energetic role

We recast the wave-current coupling terms in (S.5) in vortex-force form. Applying the standard vector identity  $(\mathbf{A} \cdot \nabla)\mathbf{B} + (\mathbf{B} \cdot \nabla)\mathbf{A} = \nabla(\mathbf{A} \cdot \mathbf{B}) - \mathbf{A} \times (\nabla \times \mathbf{B}) - \mathbf{B} \times (\nabla \times \mathbf{A})$  [e.g. 1] with  $\mathbf{A} = \mathbf{u}_\phi$ ,  $\mathbf{B} = \mathbf{u}$ , noting that  $\nabla \times \mathbf{u}_\phi \approx \mathbf{0}$  (Eq. (S.3)), and absorbing the resulting gradient  $\nabla(\mathbf{u}_\phi \cdot \mathbf{u})$  into a modified pressure  $\Pi \equiv p + \rho \mathbf{u}_\phi \cdot \mathbf{u}$ , equation (S.5) becomes

$$\partial_t \mathbf{u} + (\mathbf{u} \cdot \nabla)\mathbf{u} = \mathbf{u}_\phi \times \boldsymbol{\omega} - \frac{1}{\rho} \nabla \Pi + \nu \nabla^2 \mathbf{u}, \quad \nabla \cdot \mathbf{u} = 0. \quad (\text{S.6})$$

where  $\boldsymbol{\omega} \equiv \nabla \times \mathbf{u}$  is the vorticity of the rotational flow. The instantaneous coupling between the wave orbital motion and the rotational flow appears as the instantaneous *orbital vortex force*

$$\mathbf{f}_v(\mathbf{x}, t) \equiv \mathbf{u}_\phi(\mathbf{x}, t) \times \boldsymbol{\omega}(\mathbf{x}, t). \quad (\text{S.7})$$

We show that  $\mathbf{f}_v$  is the *only* term in (S.6) that can exchange energy between the wave field and the rotational flow. Taking the inner product of (S.6) with  $\mathbf{u}$  and integrating over the fluid volume  $V$ ,

$$\frac{d}{dt} \int_V \frac{1}{2} \rho |\mathbf{u}|^2 dV = \rho \int_V \mathbf{u} \cdot (\mathbf{u}_\phi \times \boldsymbol{\omega}) dV - \int_V \mathbf{u} \cdot \nabla \Pi dV + \rho \nu \int_V \mathbf{u} \cdot \nabla^2 \mathbf{u} dV - \rho \int_V \mathbf{u} \cdot [(\mathbf{u} \cdot \nabla)\mathbf{u}] dV. \quad (\text{S.8})$$

Under horizontally periodic boundary conditions, a rigid-lid upper surface<sup>2</sup>, and sufficient decay of the rotational field at depth ( $z \rightarrow -\infty$ ), the pressure gradient term  $\mathbf{u} \cdot \nabla \Pi = \nabla \cdot (\Pi \mathbf{u})$  and the advective nonlinearity  $\mathbf{u} \cdot [(\mathbf{u} \cdot \nabla)\mathbf{u}] = \frac{1}{2} \nabla \cdot (|\mathbf{u}|^2 \mathbf{u})$  both integrate to zero by the divergence theorem (the latter redistributes kinetic energy within the rotational subspace but cannot transfer energy to/from the wave). The viscous term gives  $\int_V \mathbf{u} \cdot \nabla^2 \mathbf{u} dV = - \int_V |\nabla \mathbf{u}|^2 dV \leq 0$  (the integration by parts produces a boundary term  $\oint \mathbf{u} \cdot (\nabla \mathbf{u} \cdot \hat{\mathbf{n}}) dS$  that vanishes under the adopted periodic/impermeable boundary conditions). The energy budget therefore reduces to

$$\frac{d}{dt} \int_V \frac{1}{2} \rho |\mathbf{u}|^2 dV = \rho \int_V \mathbf{u} \cdot (\mathbf{u}_\phi \times \boldsymbol{\omega}) dV - \rho \nu \int_V |\nabla \mathbf{u}|^2 dV, \quad (\text{S.9})$$

confirming that the orbital vortex force  $\mathbf{u}_\phi \times \boldsymbol{\omega}$  is the sole retained bulk-interior non-viscous channel of energy exchange between swell and rotational motions. Within the potential-wave approximation, the only bulk term that can transfer energy between the two subspaces is this volume integral. Other wave-energy pathways (boundary layers, breaking, air-side stress) are excluded by construction. The viscous term is strictly dissipative and cannot return energy to the wave.

## C. Wave-phase averaging, Stokes drift and gradient equivalence

The classical Craik-Leibovich (CL) theory [6–10] describes the effect of non-breaking surface waves on slowly evolving currents by averaging over the fast wave phase. Let  $\langle \cdot \rangle_\varphi$  denote this wave-phase (fast-time) average at fixed Eulerian position. (Throughout this paper,  $\langle \cdot \rangle_\varphi$  denotes the wave-phase average and  $\langle \cdot \rangle$  the ensemble average over the stationary mixed-layer measure  $\rho_{ss}$ , defined in Section S2.) Any field  $A$  decomposes as

$$A = \bar{A} + A', \quad \bar{A} \equiv \langle A \rangle_\varphi, \quad \langle A' \rangle_\varphi = 0. \quad (\text{S.10})$$

<sup>2</sup>The rigid-lid approximation for the rotational flow is the energetically consistent companion to the CL framework [6, Eq. (3.16)]. It introduces errors of  $O((ak)^2)$  in the energy balance-of order  $10^{-4}$ - $10^{-3}$  for remote swell ( $ak \sim 0.01$ - $0.05$ )-the same order as terms already neglected in the potential-wave approximation. The phase-resolved simulations of Xuan et al. [2] adopt the same boundary treatment at  $O(1)$  (their Eq. (A3)).

For a monochromatic deep-water wave propagating along  $\hat{\mathbf{x}}$  with phase  $\varphi \equiv kx - \omega t$ , the orbital velocity at a fixed Eulerian position is

$$\mathbf{u}_\phi = a\omega e^{kz}(\cos \varphi \hat{\mathbf{x}} + \sin \varphi \hat{\mathbf{z}}), \quad (\text{S.11})$$

with  $a$  the wave amplitude,  $\omega$  the angular frequency and  $k$  the wavenumber ( $\omega^2 = gk$  in deep water). Every component is proportional to  $\cos \varphi$  or  $\sin \varphi$ , so averaging over one full period gives

$$\langle \mathbf{u}_\phi \rangle_\varphi = \mathbf{0}, \quad (\text{S.12})$$

exact for the linear wave field at each spatial point. Following McWilliams [6, Chap. 4], we assume clear separation between the wave scales and the mean-flow/turbulence scales. Slowly varying fields have characteristic length scale  $L$  and time scale  $L/V$ . The waves have wavelength  $\lambda \sim 2\pi/k$  and period  $T = 2\pi/\omega$ . The scale-separation parameter

$$\varepsilon_{\text{CL}} \equiv \frac{V}{C} = \frac{\text{current speed}}{\text{wave phase speed}} \ll 1, \quad (\text{S.13})$$

with  $C = \omega/k$  the linear deep-water phase speed, guarantees that any slowly varying field  $S$  is effectively constant during a single wave period and can be factored out of the phase average,

$$\langle SQ \rangle_\varphi = S \langle Q \rangle_\varphi + O(\varepsilon_{\text{CL}}/(kL)). \quad (\text{S.14})$$

We refer to (S.14) as the *slow-field extraction rule* and invoke it repeatedly below. The error is controlled by the fractional change of the slow field during one wave period. If  $S$  evolves on an advective time scale  $L/V$ , then  $|T \partial_t S|/|S| = O(V/(\omega L)) = O(\varepsilon_{\text{CL}}/(kL))$ . Under the standard CL scale separation  $kL \gg 1$  (slow fields vary weakly over a wavelength), this quantity is small [6, Chap. 4]. More generally, the extraction requires only that  $S$  be independent of the fast wave phase, i.e.  $T/\tau_S \ll 1$  where  $\tau_S$  is the characteristic evolution time of  $S$ . The estimate  $L/V$  is the standard large-scale value in the CL setting. Applying (S.10) to the vorticity gives a split into phase-averaged (slow) and wave-slaved (oscillatory) parts,

$$\boldsymbol{\omega} = \boldsymbol{\Omega}_s + \boldsymbol{\omega}_{\text{wave}}, \quad \boldsymbol{\Omega}_s \equiv \langle \boldsymbol{\omega} \rangle_\varphi, \quad \langle \boldsymbol{\omega}_{\text{wave}} \rangle_\varphi = \mathbf{0}. \quad (\text{S.15})$$

The slow vorticity  $\boldsymbol{\Omega}_s$  includes all fields that do not depend on the wave phase. It contains both the mean-flow vorticity and the autonomous turbulent vorticity driven by local forcing (wind stress, wave breaking, and buoyancy). Its further decomposition requires a second averaging operation and is carried out in Section D. Let  $\boldsymbol{\xi}(\mathbf{x}, t) = \int^t \mathbf{u}_\phi(\mathbf{x}, t') dt'$  be the  $T$ -periodic wave-induced displacement, satisfying  $\nabla \cdot \boldsymbol{\xi} = 0$  and  $\langle \boldsymbol{\xi} \rangle_\varphi = \mathbf{0}$ . The Stokes drift is defined in Eulerian form [6, Eq. (3.11)] as

$$\mathbf{u}_s(\mathbf{x}) \equiv \langle (\boldsymbol{\xi} \cdot \nabla) \mathbf{u}_\phi \rangle_\varphi. \quad (\text{S.16})$$

Unlike  $\langle \mathbf{u}_\phi \rangle_\varphi = \mathbf{0}$ , the Stokes drift is a nonzero *second-order* quantity—the phase average of two correlated first-order oscillatory fields. Within the Generalised Lagrangian Mean (GLM) framework,  $\nabla \cdot \mathbf{u}_s = 0$  [6, Eq. (3.12), Appendix C]. Finally, we adopt the gradient-equivalence convention

$$\mathbf{F} \equiv_{\nabla} \mathbf{G} \iff \mathbf{F} - \mathbf{G} = \nabla \chi \text{ for some scalar field } \chi(\mathbf{x}). \quad (\text{S.17})$$

Two forces that are  $\equiv_{\nabla}$ -equivalent have the same curl and produce the same vorticity forcing and volume-integrated power (under the incompressibility and boundary conditions adopted in Eq. (S.9) below), since any gradient can be absorbed into the Bernoulli head. All equalities between forces below are understood in this sense unless stated otherwise.

### D. Three-layer vorticity decomposition and the McWilliams identity

The phase-averaged vorticity  $\Omega_s \equiv \langle \omega \rangle_\varphi$  introduced in (S.15) contains all fields that vary slowly compared with the wave period. We decompose it further using a second averaging operation—the ensemble average  $\langle \cdot \rangle$  over the stationary mixed-layer measure  $\rho_{ss}$ ,

$$\Omega_s = \bar{\Omega} + \omega', \quad \bar{\Omega} \equiv \langle \Omega_s \rangle = \langle \langle \omega \rangle_\varphi \rangle, \quad \langle \omega' \rangle = \mathbf{0}. \quad (\text{S.18})$$

Here  $\bar{\Omega}$  is the ensemble-mean vorticity of the mean flow and  $\omega' \equiv \Omega_s - \bar{\Omega}$  is the zero-ensemble-mean vorticity fluctuation. Physically,  $\omega'$  is driven predominantly by local forcing (wind stress, wave breaking, buoyancy) and the turbulent cascade, not by the remote-source swell—a characterisation formalised in Assumptions A3 and A5 (Section S2) and supported by the energetic estimates therein. Under standard ergodicity assumptions, the ensemble mean coincides with the Reynolds mean used in turbulence theory.

A notational convention. From Eq. (S.18) onward, the overbar denotes the *ensemble* mean ( $\bar{\Omega} \equiv \langle \Omega_s \rangle$ ) and the prime the turbulent fluctuation ( $\omega' \equiv \Omega_s - \bar{\Omega}$ ), replacing the earlier phase-decomposition usage. The two averaging operators are always distinguished by the bracket subscript,  $\langle \cdot \rangle_\varphi$  for phase,  $\langle \cdot \rangle$  for ensemble. Combined with (S.15), this gives the *three-layer* decomposition of the total vorticity,

$$\boxed{\omega = \bar{\Omega} + \omega' + \omega_{\text{wave}}}. \quad (\text{S.19})$$

The first step (phase averaging, yielding  $\Omega_s$  and  $\omega_{\text{wave}}$ ) follows the standard CL framework of McWilliams [6], who treats  $\Omega_s$  as a single deterministic slow field. The second step is where the statistical-mechanical structure enters. By splitting  $\Omega_s$  into its ensemble mean  $\bar{\Omega}$  and the zero-mean turbulent fluctuation  $\omega'$ , we assign the roles that the Mori-Zwanzig formalism (Section S2) will formalise: the swell amplitude is the slow observable, and  $\omega'$  is the fast bath whose autonomous dynamics supply both the random force and the dissipation kernel. This separation is absent in the CL framework, whose design target is the phase-averaged wave-induced forces acting on the slow-time current evolution, not wave dissipation [6, Chap. 11]. Within CL,  $\Omega_s$  enters diagnostically as a given field. For any configuration of the slow flow it determines the Stokes vortex force  $\mathbf{u}_s \times \Omega_s$ . As a deterministic framework, CL does not introduce the statistical-mechanical structure (ensemble averaging, autocorrelation functions) from which a friction coefficient could be constructed. Wave dissipation is explicitly left to other mechanisms [6, p. 54]. Our contribution is to show that the dissipation mechanism is already encoded in the CL vortex-force decomposition. It is the fluctuating component  $\mathbf{u}_\phi \times \omega'$ , which requires retaining the phase-resolved orbital velocity and adding a statistical-mechanical projection over the bath degrees of freedom.

The wave orbital motion tilts and stretches the slow vorticity  $\Omega_s$ , generating  $\omega_{\text{wave}}$  as a phase-locked oscillation. Taking the curl of (S.6) gives the vorticity equation  $\partial_t \omega = \nabla \times [(\mathbf{u}_\phi + \mathbf{u}) \times \omega] + \nu \nabla^2 \omega$ . On the fast wave timescale  $T$ ,  $\Omega_s$  is effectively frozen ( $T/\tau_{\text{eddy}} \ll 1$ ). Decomposing  $\omega = \Omega_s + \omega_{\text{wave}}$  in the wave-driven term  $\nabla \times (\mathbf{u}_\phi \times \omega)$ , the leading-order contribution is  $\nabla \times (\mathbf{u}_\phi \times \Omega_s)$ . The feedback  $\nabla \times (\mathbf{u}_\phi \times \omega_{\text{wave}})$  is  $O(ak)$  relative to this, because  $\omega_{\text{wave}}/\Omega_s = O(ak)$ . Iterating, it produces corrections to  $\omega_{\text{wave}}$  at  $O((ak)^2)$  relative to  $\Omega_s$ . The rotational self-interaction  $\nabla \times (\mathbf{u} \times \omega)$  is  $O(\varepsilon_{\text{CL}})$  relative to the wave-driven term. Both are negligible at leading order. Hence  $\partial_t \omega_{\text{wave}} \approx \nabla \times (\mathbf{u}_\phi \times \Omega_s)$ . Writing  $\mathbf{u}_\phi = \partial_t \boldsymbol{\xi}$  and noting that  $\Omega_s$  does not depend on the fast time, the time integration acts only on  $\boldsymbol{\xi}$  (with  $\nabla \cdot \mathbf{u}_\phi = 0$  and  $\nabla \cdot \Omega_s = 0$  simplifying the curl-of-cross product), giving

$$\omega_{\text{wave}} \approx \nabla \times (\boldsymbol{\xi} \times \Omega_s). \quad (\text{S.20})$$

No additional long-wavelength expansion of  $\Omega_s$  is required. The derivation is carried out at a fixed Eulerian position, with  $\nabla \Omega_s$  treated as the given spatial derivative field wherever it

appears. The only approximation is temporal freezing, with corrections of  $O(T/\tau_{\text{eddy}})$ . This is the particular (forced) solution of the linearised vorticity equation. It carries no independent degrees of freedom. It is entirely determined by the wave kinematics ( $\boldsymbol{\xi}$ ) and the full slow vorticity  $\boldsymbol{\Omega}_s$ , and oscillates synchronously with the wave. Because it is linear in  $\boldsymbol{\Omega}_s$ ,

$$\boldsymbol{\omega}_{\text{wave}} = \underbrace{\nabla \times (\boldsymbol{\xi} \times \bar{\boldsymbol{\Omega}})}_{\text{driven by mean vorticity}} + \underbrace{\nabla \times (\boldsymbol{\xi} \times \boldsymbol{\omega}')}_{\text{driven by turbulent vorticity}}. \quad (\text{S.21})$$

The first term is deterministic, the second stochastic but phase-locked to the wave (proportional to  $\boldsymbol{\xi}$ ).

The autonomous turbulent vorticity  $\boldsymbol{\omega}' = \boldsymbol{\Omega}_s - \bar{\boldsymbol{\Omega}}$  is driven by local forcing and the turbulent cascade-not by the wave. It therefore carries no dependence on the fast wave phase at a fixed Eulerian position and is approximately frozen over one wave period:  $\tau_{\text{eddy}} \sim \ell/u' \gg T$ . Statistical independence from the wave phase is a separate statement from this kinematic freezing and follows from the remote origin of swell. For trans-oceanic swell generated by a distant storm, the local realisation of  $\boldsymbol{\omega}'$  carries no information about the wave phase at a fixed point on the ray. The local turbulence is driven by local wind, breaking and buoyancy forcing, whereas the swell phase is set by conditions thousands of kilometres away. This physical decoupling underpins the phase-independence assumption A3(ii) formalised in Section S2.

On the wave timescale,  $\boldsymbol{\omega}'$  therefore looks the same as  $\bar{\boldsymbol{\Omega}}$  in the narrow sense that both are approximately constant during one period  $T$ . The critical distinction lies in their *internal structure*:

1.  $\bar{\boldsymbol{\Omega}}$  is the ensemble-mean vorticity, a single deterministic vector at each position, with no internal degrees of freedom accessible to the wave. Its contribution to  $\boldsymbol{\omega}_{\text{wave}}$  (Eq. S.21) is a periodic oscillation synchronous with the wave phase. Any work done during one half-cycle is returned during the other, yielding zero net energy transfer over a full period.
2.  $\boldsymbol{\omega}'$ , by contrast, is a full turbulent field possessing its own internal degrees of freedom, including the full hierarchy of the turbulent cascade and local forcing. Although  $\boldsymbol{\omega}'$  is approximately frozen on the wave timescale, its internal dynamics continuously redistribute energy among its modes on the eddy-turnover time  $\ell/u'$ . During a single wave period, a small fraction  $T u'/\ell \sim \mathcal{O}(10^{-2})$  of any energy injected by the wave into an eddy is redistributed among the eddy's internal modes before the wave phase returns to its original value. This small but nonzero redistribution prevents exact energy return.

This distinction-the presence or absence of internal degrees of freedom-is the microscopic origin of irreversibility in the SVF theory, analogous to the distinction between elastic scattering off a rigid wall and inelastic scattering off a thermal-bath molecule (Section S2I).

The connection between the wave-slaved coupling and the Stokes-drift form used in CL theory is established by the McWilliams identity [6, Appendix G]. For any solenoidal field  $\boldsymbol{Z}$  that is independent of the fast wave phase (i.e. varies only on timescales  $\gg T$ ),

$$\langle \boldsymbol{u}_\phi \times [\nabla \times (\boldsymbol{\xi} \times \boldsymbol{Z})] \rangle_\varphi = \boldsymbol{u}_s \times \boldsymbol{Z} + \nabla C, \quad (\text{S.22})$$

where  $C$  is a scalar field. The identity rectifies a quadratic wave-phase correlation into the Stokes-drift form. It is linear in  $\boldsymbol{Z}$  and relies on small slope, incompressibility, and phase-independence of  $\boldsymbol{Z}$  [6, Appendix G]. To verify (S.22), one expands  $\nabla \times (\boldsymbol{\xi} \times \boldsymbol{Z})$  via the BAC-CAB identity, takes the cross product with  $\boldsymbol{u}_\phi$ , and phase-averages term by term using the explicit orbital velocity (S.11). The key step is that the second-order correlator  $\langle u_i^\varphi \partial_j \xi_k \rangle_\varphi$  evaluates, by direct calculation with the deep-water eigenfunction, to a combination of Stokes-drift components and gradient corrections. Collecting terms yields the right-hand side of (S.22). A self-contained proof occupies approximately two pages of vector algebra and is given in McWilliams [6, Appendix G].

**Remark 1** (Assumptions behind the McWilliams identity). *Identity (S.22) is a kinematic consequence of wave-period averaging of quadratic wave quantities. It requires only that  $\mathbf{Z}$  be solenoidal and independent of the fast wave phase, so that it may be treated as frozen in time during the one-period phase average. No additional weak-spatial-variation assumption is required for the identity itself beyond the conditions stated in McWilliams [6, Appendix G]. Any spatial dependence of  $\mathbf{Z}$  enters only through gradient terms that are absorbed into  $\nabla C$ . Since  $\nabla \times (\nabla C) = \mathbf{0}$ , such terms do not affect the vorticity forcing. The fact that the residual term indeed takes pure gradient form is proved in McWilliams [6, Appendix G, Eq. (G.7)] for any non-divergent  $\mathbf{Z}$ . Separately, the approximation (S.20) for the wave-slaved vorticity relies on temporal scale separation ( $\partial_t \Omega_s$  negligible over one wave period), with corrections controlled by  $T/\tau_{\text{slow}}$  for the relevant slow component.*

Setting  $\mathbf{Z} = \Omega_s = \bar{\Omega} + \omega'$  in (S.22) and using (S.20),

$$\langle \mathbf{u}_\phi \times \omega_{\text{wave}} \rangle_\varphi \equiv \nabla \mathbf{u}_s \times \Omega_s = \mathbf{u}_s \times \bar{\Omega} + \mathbf{u}_s \times \omega'. \quad (\text{S.23})$$

The first term,  $\mathbf{u}_s \times \bar{\Omega}$ , is the deterministic CL vortex force driving Langmuir circulations [11, 12]. The second,  $\mathbf{u}_s \times \omega'$ , is a slow stochastic contribution. The full phase-averaged force  $\mathbf{u}_s \times \Omega_s$  modifies the mean flow on time scales  $\gg T$  but carries no power at the swell frequency  $\omega$  and thus does not, by itself, damp the wave mode. (A separate, direction-dependent CL energy pathway  $\propto \cos \Delta\theta$  exists in wind seas but is expected to be small in path mean for remote swell owing to sign cancellations, see Section S9.)

The identity (S.23) and the wave-slaved vorticity (S.20) have been independently verified by wave-resolving simulation [13], which solved the full Navier-Stokes equations without invoking CL averaging. In our notation, their mean-vorticity analysis confirms that the wave-induced torque  $\nabla \times \langle \mathbf{u}_\phi \times \omega_{\text{wave}} \rangle_\varphi$  agrees with the curl of the vortex force  $\nabla \times (\mathbf{u}_s \times \Omega_s)$  to correlation coefficients exceeding 0.99, and that  $\omega_{\text{wave}}$  is produced by tilting and stretching of the slow vorticity  $\Omega_s$  by wave motion, consistent with (S.20).

### E. Identification of the stochastic vortex force

Substituting the three-layer decomposition (S.19) into the orbital vortex force (S.7) separates three physically distinct couplings. Interaction with the ensemble-mean vorticity  $\bar{\Omega}$ , with the wave-slaved vorticity  $\omega_{\text{wave}}$ , and with the autonomous turbulent fluctuation  $\omega'$ . The turbulent fluctuation  $\omega'$  participates in two of these. First, wave orbital motion acting on  $\omega'$  generates a component of the wave-slaved vorticity  $\omega_{\text{wave}} = \nabla \times (\boldsymbol{\xi} \times \Omega_s)$  (Term II below). The resulting phase-averaged force is the zero-frequency CL contribution  $\mathbf{u}_s \times \omega'$ , which does not project onto the wave mode. Second,  $\omega'$  couples directly to the oscillating orbital velocity through  $\mathbf{u}_\phi \times \omega'$  (Term III below). This force has zero phase mean but nonzero autocorrelation, and constitutes the microscopic coupling analysed in Sections S2-S5. The three-term split is,

$$\mathbf{f}_v = \mathbf{u}_\phi \times \omega = \underbrace{\mathbf{u}_\phi \times \bar{\Omega}}_{\text{Term I}} + \underbrace{\mathbf{u}_\phi \times \omega_{\text{wave}}}_{\text{Term II}} + \underbrace{\mathbf{u}_\phi \times \omega'}_{\text{Term III}}. \quad (\text{S.24})$$

We evaluate the phase average of each term in turn. For Term I,  $\bar{\Omega}$  is slowly varying. By (S.14) and (S.12),

$$\langle \mathbf{u}_\phi \times \bar{\Omega} \rangle_\varphi = \mathbf{0}. \quad (\text{S.25})$$

For Term II, the McWilliams identity (S.23) gives

$$\langle \mathbf{u}_\phi \times \omega_{\text{wave}} \rangle_\varphi \equiv \nabla \mathbf{u}_s \times \Omega_s = \mathbf{u}_s \times \bar{\Omega} + \mathbf{u}_s \times \omega'. \quad (\text{S.26})$$

For Term III,  $\omega'$  is slowly varying on the wave timescale ( $\tau_{\text{eddy}} \gg T$ ). By the slow-field extraction rule,

$$\langle \mathbf{u}_\phi \times \omega' \rangle_\varphi = \langle \mathbf{u}_\phi \rangle_\varphi \times \omega' + O(T/\tau_{\text{eddy}}) = \mathbf{0} \times \omega' + O(T/\tau_{\text{eddy}}) = O(T/\tau_{\text{eddy}}), \quad (\text{S.27})$$

so its phase average vanishes to leading order. This vanishing is a *kinematic* consequence of the slow-field extraction rule and  $\langle \mathbf{u}_\phi \rangle_\varphi = \mathbf{0}$  and it holds regardless of how  $\boldsymbol{\omega}'$  was generated. The deeper requirement—that  $\boldsymbol{\omega}'$  be *statistically independent* of the wave phase, not merely slow-enters only at the ensemble level in the Green-Kubo analysis of Section S2 (Assumption A3(ii)). Collecting the three results,

$$\langle \mathbf{f}_v \rangle_\varphi \equiv \nabla \times \mathbf{u}_s \times \boldsymbol{\Omega}_s, \quad (\text{S.28})$$

recovering the classical CL result. On time scales long compared with the wave period, the net effect of the orbital motion on the slow flow is the CL vortex force.

All three terms in (S.24) have zero or slow phase averages, so the question of irreversibility cannot be resolved at the level of first-order (mean-force) diagnostics. Whether swell is damped or not depends on the cumulative work done by the *fluctuating* part of the force as the wave packet propagates through the turbulent field. We therefore examine each term's capacity for net energy transfer on the wave timescale.

**Mean-vorticity term ( $\mathbf{u}_\phi \times \bar{\boldsymbol{\Omega}}$ ).**  $\bar{\boldsymbol{\Omega}}$  has no accessible internal degrees of freedom. Its coupling to the orbital motion therefore produces a phase-locked, reversible response. At leading order it renormalises the wave frequency, but does not contribute to the dissipative Green-Kubo real part that defines the mode-level damping rate.

**Wave-slaved term ( $\mathbf{u}_\phi \times \boldsymbol{\omega}_{\text{wave}}$ ).** The wave-slaved vorticity  $\boldsymbol{\omega}_{\text{wave}} = \nabla \times (\boldsymbol{\xi} \times \boldsymbol{\Omega}_s)$  carries no independent degrees of freedom at leading order. The retained wave-slaved contribution is fully determined by the instantaneous wave kinematics and the frozen slow field, leaving no autonomous bath-like dynamics that could generate irreversible redistribution of energy. Because both  $\mathbf{u}_\phi$  and  $\boldsymbol{\omega}_{\text{wave}}$  oscillate at the wave frequency  $\omega$ , their product has spectral support at leading order only at frequencies 0 and  $2\omega$ . (For a narrowband wave packet with slowly modulated envelope, the spectral leakage away from 0 and  $2\omega$  is higher order and does not generate a secular component at  $\omega$  to leading order.) The slow (0-frequency) component is precisely the CL force  $\mathbf{u}_s \times \boldsymbol{\Omega}_s$ , which modifies the mean-flow evolution on timescales  $\gg T$  but carries no spectral weight at the swell frequency  $\omega$  and therefore cannot contribute to the Green-Kubo damping rate of that wave mode. The  $2\omega$  component likewise has no projection onto the swell mode. Term II therefore cannot contribute to the mode-level damping rate.

**Turbulent-fluctuation term ( $\mathbf{u}_\phi \times \boldsymbol{\omega}'$ ).** By contrast,  $\boldsymbol{\omega}'$  possesses internal degrees of freedom that prevent exact reversal (as discussed in Section D and quantified in Section S6). Furthermore, as the swell propagates at  $c_g \sim 10\text{-}15 \text{ m s}^{-1}$ , it successively encounters statistically independent turbulent regions, providing a finite decorrelation length along the ray. Within this decomposition, Term III is the only component that possesses both ingredients for irreversible energy transfer. It has internal degrees of freedom, preventing exact reversal over a cycle, and spatial decorrelation, preventing coherent cancellation over many cycles. The two ingredients play distinct roles. Spatial decorrelation controls the *magnitude* of the damping rate by setting the Green-Kubo convergence time. The internal evolution of  $\boldsymbol{\omega}'$  guarantees its *sign* (Section I). Within the present bulk, non-breaking, potential-wave framework, Term III is the unique candidate for irreversible swell attenuation. We define the *stochastic vortex force* (SVF),

$$\boxed{\mathbf{f}_{\text{svf}} \equiv \mathbf{u}_\phi \times \boldsymbol{\omega}'}. \quad (\text{S.29})$$

The statistical-mechanical framework of Section S2 formalises this picture. Projecting the full dynamics onto the swell subspace via the Mori-Zwanzig formalism identifies the orthogonal (noise) force that drives the memory kernel. Under the scale-separation and statistical-decoupling assumptions A2-A4, this projected force reduces precisely to the SVF,

$$F_{\mathbf{k}}(t) = [Q(\mathbf{u}_\phi \times \boldsymbol{\omega})]_{\mathbf{k}} \longrightarrow [\mathbf{u}_\phi \times \boldsymbol{\omega}']_{\mathbf{k}}, \quad (\text{S.30})$$

where  $Q = 1 - P$  is the orthogonal projector in the Hilbert space of observables and the arrow denotes the identification that holds under Assumptions A2-A4 (not an algebraic identity). The discarded contributions are absorbed into the streaming term and into gradient/solenoidal forces whose net work on the swell mode vanishes.

A deliberate choice underlies the derivation. We keep a phase-resolved *Eulerian* description rather than working directly in the Generalised Lagrangian Mean (GLM) framework of classical Craik-Leibovich theory. GLM absorbs wave effects into Lagrangian-mean quantities and yields the phase-averaged CL vortex force ( $\mathbf{u}_s \times \boldsymbol{\Omega}_s$ ), while practical mean-flow applications often focus on its ensemble-mean component ( $\mathbf{u}_s \times \bar{\boldsymbol{\Omega}}$ ). Here our target is different. The irreversible attenuation arises from the *fluctuating* coupling  $\mathbf{f}_{\text{svf}} = \mathbf{u}_\phi \times \boldsymbol{\omega}'$ . This term has zero phase mean and is therefore absent from the mean CL force, yet its *two-time* autocorrelation determines the friction coefficient via the Green-Kubo formula. Retaining the wave-slaved response  $\boldsymbol{\omega}_{\text{wave}}$  and the instantaneous force  $\mathbf{f}_{\text{svf}}$  makes the subsequent statistical closure and the link to observations explicit.

## S2. Non-negativity of the Green-Kubo damping coefficient

This section proves that  $\Gamma(\mathbf{k}) \geq 0$  for any surface gravity wave propagating through turbulence, using the Green-Kubo relation [14, 15]

$$\Gamma(\mathbf{k}) = \frac{1}{2E_{\mathbf{k}}} \int_0^\infty \text{Re} \langle F_{\mathbf{k}}(0) F_{\mathbf{k}}^*(\tau) \rangle d\tau, \quad (\text{S.31})$$

where  $F_{\mathbf{k}}$  is the mode-projected stochastic vortex force identified in Section S1 and connected to the Mori-Zwanzig formalism below. The inequality follows from Bochner's theorem [16] and holds regardless of the bath spectrum  $E_\omega(q)$ . The quantitative evaluation is carried out in Sections S3-S5. We retain the notation of Section S1:  $\langle \cdot \rangle_\phi$  for the wave-phase average,  $\langle \cdot \rangle$  for the ensemble average over the stationary bath measure  $\rho_{\text{ss}}$ .

### A. Assumptions A1-A6

To connect the microscopic SVF to a coarse-grained damping rate we make six assumptions. We first state them in compact form. The subsequent discussion gives physical motivation and typical values (verified a posteriori).

**A1 (Resolved wave band).** There exists a narrow band  $\mathcal{B}$  of swell wavenumbers such that each  $\mathbf{k} \in \mathcal{B}$  admits a linear dispersion relation  $\omega(\mathbf{k})$  and a complex amplitude  $a_{\mathbf{k}}(t)$ , with modal energy

$$E_{\mathbf{k}}(t) \equiv \frac{1}{2} |a_{\mathbf{k}}(t)|^2. \quad (\text{S.32})$$

Ensemble averages  $\langle \cdot \rangle$  act on the bath degrees of freedom  $\boldsymbol{\omega}'$  at fixed  $\{a_{\mathbf{k}}\}$ . When needed, a further average over wave realisations is denoted explicitly. Nonlinear wave-wave interactions are negligible on the attenuation time scale  $\Gamma^{-1}$  for far-field swell [17].

**A2 (Time-scale separation).** The force autocorrelation decays on a correlation time  $\tau_c$  much shorter than the attenuation time,

$$\tau_c \ll \Gamma(\mathbf{k})^{-1} \quad \text{for all } \mathbf{k} \in \mathcal{B}. \quad (\text{S.33})$$

**A3 (Bath statistics and phase decoupling).** Three sub-conditions on the autonomous turbulent vorticity  $\boldsymbol{\omega}'$ :

- (i) *Local stationarity and homogeneity.* The statistics of  $\boldsymbol{\omega}'$  are stationary and translation-invariant within analysis patches of size  $O(k^{-1})$ ; the slow along-ray variation of the bath parameters is treated by a local closure (Section S5 E).

(ii) *Phase decoupling.* The statistics of  $\boldsymbol{\omega}'$  are independent of the swell phase.

(iii) *Zero ensemble mean.*  $\langle \boldsymbol{\omega}' \rangle_{\rho_{\text{bath}}} = \mathbf{0}$ .

**A4 (Linear truncation in wave amplitude).** The SVF enters the amplitude equation at first order in  $\{a_{\mathbf{k}}\}$ . Feedback terms of order  $|a_{\mathbf{k}}|^2$  can be neglected.

**A5 (Locally stationary reference measure).** Two sub-conditions:

(i) *Local stationarity.* For each fixed value of the resolved wave amplitudes  $\{a_{\mathbf{k}}\}$  (treated as quasi-constant over  $\tau \lesssim \tau_c$ ), the mixed-layer turbulence admits a locally stationary reference measure  $\rho_{\text{bath}}(\boldsymbol{\omega}')$  over the support of the memory kernel.

(ii) *Factorisation.* The full reference measure factorises approximately into independent wave and bath parts:

$$\rho_{\text{ss}}(\{a_{\mathbf{k}}\}, \boldsymbol{\omega}') \approx \rho_{\text{wave}}(\{a_{\mathbf{k}}\}) \rho_{\text{bath}}(\boldsymbol{\omega}'). \quad (\text{S.34})$$

No equilibrium-specific properties (Boltzmann form, detailed balance, equipartition) are imposed. The NESS structure is discussed in Section B. No global stationary measure for the coupled wave-turbulence system is assumed. The wave amplitude is quasi-frozen over  $\tau \lesssim \tau_c$  ( $\Gamma\tau_c \sim 10^{-6}$ - $10^{-4}$ ), making  $C_F(\tau)$  and the Mori-Zwanzig inner product well-defined to leading order in  $\delta$ .

**A6 (Finite memory).** The mode-projected SVF has an absolutely integrable autocorrelation, so that the Green-Kubo integral converges.

The physical origin of  $\tau_c$  in A2 is advective phase decorrelation along the wave-energy trajectory. For a  $T = 15$  s swell ( $k \approx 0.018 \text{ m}^{-1}$ ,  $c_g \approx 11.7 \text{ m s}^{-1}$ ), the dominant coupling is with eddies of scale  $\ell \sim k^{-1} \approx 56 \text{ m}$  (Section S3F). As the wave-energy trajectory advances at  $c_g$ , the mode-projected force from a turbulent mode at wavenumber  $q$  acquires an advected phase  $\exp(i\mathbf{q} \cdot \mathbf{c}_g t)$ . At the dominant scale  $q \sim k$  this phase reaches  $O(1)$  in  $\tau_{\text{adv}} \sim 1/(k c_g) \approx 4.8 \text{ s}$ , after which successive eddy-scale patches contribute to the Green-Kubo integral with randomised phases. The decorrelation is spatial in origin. The wave-energy trajectory advances through a spatially incoherent turbulent field, not a temporally evolving one. Irreversibility requires the eddy's internal degrees of freedom to evolve during the encounter ( $\delta = \tau_c/\tau_{\text{eddy}} > 0$ , Section I). Over the attenuation time  $\Gamma^{-1} \sim 10^5$ - $10^6 \text{ s}$ , the packet encounters  $\Gamma^{-1}/\tau_c \sim 10^4$ - $10^5$  eddies in sequence along its ray. A2 is not needed for the inequality  $\Gamma \geq 0$ , which follows from Bochner's theorem alone. It enters when interpreting  $\Gamma$  as the rate of exponential decay in the Markovian limit.

Assumption A3 draws on the three-layer decomposition of Sec. S1:  $\boldsymbol{\omega} = \bar{\boldsymbol{\Omega}} + \boldsymbol{\omega}' + \boldsymbol{\omega}_{\text{wave}}$ , with  $\boldsymbol{\Omega}_s = \bar{\boldsymbol{\Omega}} + \boldsymbol{\omega}'$  the phase-averaged (slow) vorticity. Sub-condition A3(i) requires that the vorticity statistics be translation-invariant within each analysis patch of size  $O(k^{-1})$ . With this local homogeneity the SVF correlation takes the form

$$\langle \mathbf{f}_{\text{svf}}(\mathbf{x}, t) \otimes \mathbf{f}_{\text{svf}}(\mathbf{x}', t') \rangle = \mathbf{C}_f(\mathbf{x} - \mathbf{x}', t - t'). \quad (\text{S.35})$$

Sub-condition A3(ii), the phase decoupling, follows from the remote origin of swell (as discussed in Sec. S1). Even when swell-driven Stokes drift modifies the local turbulence—for instance by driving Langmuir circulations—this modification depends only on the phase-averaged Stokes drift  $\mathbf{u}_s \propto |a_{\mathbf{k}}|^2 \omega_{\mathbf{k}} e^{2kz}$ , a second-order quantity that carries no information about the instantaneous wave phase. The turbulence statistics may therefore depend on the swell *amplitude* (a higher-order effect addressed under A4) but remain independent of the swell *phase*, which is set by conditions thousands of kilometres away. The observed amplitude-independence of attenuation rates [18, 19] provides empirical confirmation of this decoupling. Sub-condition A3(iii), the zero ensemble mean, holds by definition of the Reynolds decomposition  $\boldsymbol{\omega}' = \boldsymbol{\Omega}_s - \bar{\boldsymbol{\Omega}}$  (Section S1, Eq. S.18).

The SVF  $\mathbf{f}_{\text{svf}} = \mathbf{u}_\phi \times \boldsymbol{\omega}'$  vanishes under both the phase average (because  $\langle \mathbf{u}_\phi \rangle_\varphi = \mathbf{0}$ ) and the ensemble average (because  $\langle \boldsymbol{\omega}' \rangle = \mathbf{0}$ ), as required for a fluctuating force in the Mori-Zwanzig sense.

The coupling parameter in A4 is  $\delta \equiv u'/c_g$  (formally defined in Eq. S.71 below), where  $u'$  is a typical turbulent velocity at the eddy scale  $\ell \sim k^{-1}$  that couples most strongly to the swell (Sec. S3) and  $c_g$  is the group velocity. For far-field swell,  $\delta \sim 10^{-3}$ - $10^{-2}$ . Two estimates confirm the validity of the linear truncation. First, per-encounter linearity. Over one correlation time  $\tau_c \sim 5$  s the fractional amplitude change is  $\Gamma\tau_c \sim 10^{-6} \text{ s}^{-1} \times 5 \text{ s} \sim 5 \times 10^{-6}$  (the value  $\Gamma \sim 10^{-6} \text{ s}^{-1}$  follows from the closed-form evaluation in Sections S3-S5), well inside the linear-response regime. Nonlinear corrections enter at  $\mathcal{O}(\delta^2) \sim 10^{-6}$ - $10^{-4}$ . Second, the weak-probe condition. The total power extracted from the swell,  $\dot{W} \sim 2\Gamma E_w \sim 5 \times 10^{-3} \text{ W m}^{-2}$  for typical far-field amplitudes ( $H_s \sim 2$  m), is two orders of magnitude below the  $\sim 0.1$ - $1 \text{ W m}^{-2}$  supplied to the mixed-layer turbulent bath by wind-wave breaking, current shear and Langmuir circulations [20–22]. Since  $\dot{W} \propto H_s^2$ , the weak-probe condition is comfortably satisfied for the far-field swell regime  $H_s \lesssim 5$  m considered throughout this work. Near-storm conditions ( $H_s \gtrsim 10$  m) violate A4 together with A1 and A3(ii).

Assumption A5 posits the existence of at least one stationary measure  $\rho_{\text{ss}}(\{a_{\mathbf{k}}\}, \boldsymbol{\omega}')$  for the wind-driven mixed layer, maintained in a statistically steady state by the balance of forcing and dissipation. Correlation functions under  $\rho_{\text{ss}}$  are time-translation invariant on the support of the memory kernel ( $\sim \tau_c$ ). The measure factorises to good approximation as in Eq. (S.34), reflecting the negligible back-reaction of remote-source swell on local turbulence. The mode-projected stochastic force in A6,

$$F_{\mathbf{k}}(t) = \int d^3\mathbf{x} \psi_{\mathbf{k}}^*(\mathbf{x}) \cdot \mathbf{f}_{\text{svf}}(\mathbf{x}, t), \quad (\text{S.36})$$

is defined by expanding the wave velocity field onto the linear deep-water eigenfunctions,  $\mathbf{u}_\phi(\mathbf{x}, t) = \sum_{\mathbf{k} \in \mathcal{B}} a_{\mathbf{k}}(t) \boldsymbol{\psi}_{\mathbf{k}}(\mathbf{x}) + \text{c.c.}$ , with normalisation chosen such that  $E_{\mathbf{k}} = \frac{1}{2}|a_{\mathbf{k}}|^2$ . For deep-water surface gravity waves the linearised operator is self-adjoint under the energy inner product, so  $\boldsymbol{\psi}_{\mathbf{k}}$  serves simultaneously as the eigenfunction and its adjoint. The projection (S.36) is therefore unambiguous. The memory kernel is diagonal in wavevector as a consequence of the translational invariance of the bath statistics (A3(i)) and the Fourier structure of the mode functions. Cross-correlations  $\langle F_{\mathbf{k}} F_{\mathbf{k}'}^* \rangle$  vanish for  $\mathbf{k} \neq \mathbf{k}'$ . The mode-projected force has an absolutely integrable autocorrelation

$$\int_0^\infty |\langle F_{\mathbf{k}}(0) F_{\mathbf{k}}(\tau)^* \rangle| d\tau < \infty. \quad (\text{S.37})$$

By stationarity,  $C_F(-\tau) = C_F(\tau)^*$ , so half-axis integrability implies  $C_F \in L^1(\mathbb{R})$  and the Fourier transform  $S_F(\omega)$  is well defined. The physical mechanism ensuring rapid convergence is the same advective phase decorrelation discussed under A2. Sweeping at  $c_g \gg u'$  suppresses long-time tails (cf. the  $t^{-3/2}$  Alder-Wainwright tails of molecular fluids [23]), placing the system deep in the Markovian regime. Assumptions A1, A3(i), A5(i) and A6 are the structural inputs to the non-negativity theorem. A2, A3(ii) and A4 enter later, when we pass from the generalised Langevin equation to a Markovian damping rate and to pathwise statistics. A5(ii) enters in the cancellation of probe energy from  $\Gamma$  (Section C.4). None of these assumptions refers to the specific form of the bath spectrum  $E_\omega(q)$ . The non-negativity theorem is therefore independent of whether the turbulence is in the inertial range, the viscous range, or a transitional regime.

**Remark 2** (Swell-driven Langmuir feedback and the weak-probe condition). *The weak-probe estimates in A4 show that far-field swell extracts at most a few percent of the bath TKE input. A subtler back-reaction channel is the modification of  $\varepsilon$  through swell-Stokes-drift-driven Langmuir turbulence. In moderate winds, the swell band contributes  $\lesssim \mathcal{O}(10\%)$  of the total near-surface  $u_s$  [22, 24]. In light winds this fraction can be larger, and even when the surface fraction is small the swell Stokes drift penetrates to depths  $\sim 1/(2k) \sim 30$  m, well below the wind-wave*

contribution. The relevant question is not whether swell modifies  $\varepsilon$ , but whether that modification depends on swell amplitude—and thereby introduces a nonlinear feedback on  $\Gamma$ . Since the Stokes drift scales as  $u_s \propto |a_k|^2$ , any such feedback enters at  $\mathcal{O}(|a_k|^2)$  relative to the leading-order SVF coupling, consistent with the  $A_4$  truncation. The observed amplitude-independence of attenuation rates [18, 19] confirms that this feedback is negligible in the far-field regime.

## B. Non-equilibrium steady states and FDR-II

The Mori-Zwanzig projection starts from a stationary measure  $\rho_{\text{ss}}$ , defines an inner product

$$\langle A, B \rangle_\rho = \int A(\mathbf{X}) B^*(\mathbf{X}) \rho_{\text{ss}}(\mathbf{X}) d\mathbf{X}, \quad (\text{S.38})$$

and constructs the orthogonal projector  $\mathcal{P}$  onto the chosen slow subspace. The derivation of the generalised Langevin equation and of the second fluctuation-dissipation relation uses only the algebra of  $\mathcal{P}$  and  $\mathcal{Q} = 1 - \mathcal{P}$  and the stationarity of  $\rho_{\text{ss}}$ , not its functional form or any symmetry of the Liouville operator [25, 26]. In particular, the second fluctuation-dissipation relation (FDR-II),

$$K_{\mathbf{k}}(\tau) = \frac{\langle F_{\mathbf{k}}(0) F_{\mathbf{k}}(\tau)^* \rangle}{\langle |a_{\mathbf{k}}|^2 \rangle_{\text{ref}}}, \quad (\text{S.39})$$

holds for any stationary measure, whether equilibrium or driven-dissipative. It follows from the algebra of the Mori-Zwanzig projectors alone. The construction uses only two properties. First, the self-adjointness of  $\mathcal{P}$  under  $\langle \cdot, \cdot \rangle_\rho$  ( $\langle \mathcal{P}A, B \rangle_\rho = \langle A, \mathcal{P}B \rangle_\rho$ ), which holds by construction as an orthogonal projection. Second, the time-translation invariance of correlation functions under  $\rho_{\text{ss}}$ , which requires only  $\mathcal{L}$ -invariance of the measure, not detailed balance or self-adjointness of  $\mathcal{L}$  [25, 26]. The local forcing-driven mixed layer is a mechanically forced NESS in the sense of Evans and Morriss [27]. Analogous Green-Kubo relations have been validated in mechanically driven fluids [27, 28] and active-matter systems [29, 30]. The stationarity required here is only local in time.  $\rho_{\text{ss}}$  must be time-translation invariant over the support of the memory kernel ( $\sim \tau_c$ ), not over the full swell propagation time. Section D shows that this condition is satisfied with four orders of magnitude of margin ( $\tau_c/\tau_{\text{NESS}} \sim 10^{-4}$ ), even in the most conservative climate zone along the ray.

## C. Operational construction of the reference measure

The Mori-Zwanzig formalism requires an inner product weighted by  $\rho_{\text{ss}}$  but not its explicit functional form. For swell, three properties are sufficient. Stationarity, factorisation into wave and bath sectors, and finite second moments of the bath vorticity.

### C.1. Factorisation and orthogonality

Remote swell and local turbulence are forced by independent mechanisms. The factorisation (S.34) expresses the negligible back-reaction of remote-source swell on local turbulence. Under this factorisation, the orthogonality required by the projection formalism follows directly,

$$\langle F_{\mathbf{k}} a_{\mathbf{k}}^* \rangle = \langle a_{\mathbf{k}}^* \underbrace{\langle F_{\mathbf{k}} \rangle_{\rho_{\text{bath}}}}_{=0} \rangle_{\rho_{\text{wave}}} = 0, \quad (\text{S.40})$$

since  $F_{\mathbf{k}}$  is linear in  $\boldsymbol{\omega}'$  and  $\langle \boldsymbol{\omega}' \rangle_{\rho_{\text{bath}}} = \mathbf{0}$  (A3(iii)). Orthogonality thus reflects the physical decoupling between swell and bath, rather than an additional postulate.

### C.2. Bath sector: second-order vorticity statistics

The Green-Kubo numerator involves the force autocorrelation

$$C_F(\tau) = \left\langle \int d^3\mathbf{x} \boldsymbol{\psi}_{\mathbf{k}}^* \cdot (\mathbf{u}_\phi \times \boldsymbol{\omega}')(\mathbf{x}, 0) \int d^3\mathbf{x}' \boldsymbol{\psi}_{\mathbf{k}} \cdot (\mathbf{u}_\phi \times \boldsymbol{\omega}')^*(\mathbf{x}', \tau) \right\rangle. \quad (\text{S.41})$$

Given the wave field  $\mathbf{u}_\phi$ , this depends on  $\rho_{\text{bath}}$  only through the second-order vorticity statistics. For locally isotropic turbulence—an assumption justified within the ocean mixed layer in Section S5 G and implicit throughout the spectral evaluation of Sections S3-S5—the vorticity covariance takes the solenoidal form

$$\langle \omega'_i(\mathbf{q}) \omega'^*_j(\mathbf{q}') \rangle_{\rho_{\text{bath}}} = \frac{E_\omega(q)}{4\pi} (\delta_{ij} - \hat{q}_i \hat{q}_j) \delta(\mathbf{q} - \mathbf{q}'), \quad (\text{S.42})$$

where  $E_\omega(q) = q^2 E_u(q)$  and  $E_u(q) = 4\pi q^2 S_u(q)$  is the isotropic one-dimensional velocity spectrum, normalised so that  $\int_0^\infty E_u(q) dq = \frac{1}{2} \langle |\mathbf{u}'|^2 \rangle$ . The prediction chain therefore closes as

$$E_\omega(q) \longrightarrow C_F(\tau; \mathbf{k}) \longrightarrow S_F(0; \mathbf{k}) \longrightarrow \Gamma(\mathbf{k}), \quad (\text{S.43})$$

once  $E_\omega(q)$  is specified. No higher-order vorticity statistics are needed. The full complexity of the turbulent bath is filtered through a single spectral function. Unlike the pair correlation function  $g(r)$  required in the analogous Green-Kubo integral for simple-liquid viscosity [31], the turbulent vorticity spectrum  $E_\omega(q)$  in the inertial range is fixed by the Kolmogorov cascade [32] to  $E_\omega(q) \propto \varepsilon^{2/3} q^{1/3}$ . No closure beyond the Kolmogorov inertial-range spectrum is needed (Sec. S4).

### C.3. What we need from $\rho_{\text{wave}}$ . Externally prescribed modal energy

The denominator of FDR-II (S.39) is the reference modal energy  $\langle |a_{\mathbf{k}}|^2 \rangle_{\text{ref}} = 2E_{\mathbf{k}}$ , prescribed by the remote storm, not by the local bath. Probe and bath are parameterised by independent energy scales— $E_{\mathbf{k}}$  and  $\varepsilon$ —so  $E_{\mathbf{k}}$  cancels exactly from  $\Gamma$  (Section C.4).

### C.4. Independence of the damping rate from probe energy

Although both numerator and denominator of (S.31) depend on  $E_{\mathbf{k}}$ , the dependence cancels exactly when linear coupling and statistical decoupling both hold. The stochastic vortex force is bilinear:  $\mathbf{f}_{\text{svf}} = \mathbf{u}_\phi \times \boldsymbol{\omega}'$ , with  $\mathbf{u}_\phi \propto a_{\mathbf{k}}$ . Under the linear truncation (A4), the mode-projected force inherits this linearity:  $F_{\mathbf{k}} \propto a_{\mathbf{k}}$ . Over the short correlation window  $\tau \lesssim \tau_c$  the amplitude varies negligibly (A2 and Eq. (S.49)), so that  $a_{\mathbf{k}}(0)a_{\mathbf{k}}^*(\tau) \approx |a_{\mathbf{k}}|^2$  within the Green-Kubo integral. Factorisation A5(ii) then permits the numerator to be decomposed as

$$\langle F_{\mathbf{k}}(0) F_{\mathbf{k}}^*(\tau) \rangle = \langle |a_{\mathbf{k}}|^2 \rangle \times \mathcal{G}_{\mathbf{k}}(\tau), \quad (\text{S.44})$$

where  $\mathcal{G}_{\mathbf{k}}(\tau)$  depends only on the bath vorticity statistics and the mode geometry (wave polarisation  $\boldsymbol{\psi}_{\mathbf{k}}$  and wavenumber  $k$ ), but not on  $E_{\mathbf{k}}$ . Substituting (S.44) into (S.31) and noting  $\langle |a_{\mathbf{k}}|^2 \rangle = 2E_{\mathbf{k}}$  gives

$$\Gamma(\mathbf{k}) = \frac{1}{2E_{\mathbf{k}}} \int_0^\infty \text{Re}[\langle |a_{\mathbf{k}}|^2 \rangle \mathcal{G}_{\mathbf{k}}(\tau)] d\tau = \int_0^\infty \text{Re}[\mathcal{G}_{\mathbf{k}}(\tau)] d\tau. \quad (\text{S.45})$$

We define

$$K_{\mathbf{k}}(\tau) \equiv \frac{\langle F_{\mathbf{k}}(0) F_{\mathbf{k}}(\tau)^* \rangle}{2E_{\mathbf{k}}} = \mathcal{G}_{\mathbf{k}}(\tau), \quad \Gamma(\mathbf{k}) = \int_0^\infty \text{Re}[K_{\mathbf{k}}(\tau)] d\tau, \quad (\text{S.46})$$

independent of the wave energy. Both assumptions are essential. If the SVF entered at second order ( $F_{\mathbf{k}} \propto |a_{\mathbf{k}}|^2$ ), the numerator would scale as  $E_{\mathbf{k}}^2$ , making the memory kernel  $K_{\mathbf{k}} \propto E_{\mathbf{k}}$  and the damping rate probe-dependent—the nonlinear-microrheology regime. Likewise, if the bath statistics depended on the surface wave energy,  $\mathcal{G}_{\mathbf{k}}$  would carry an implicit  $E_{\mathbf{k}}$ -dependence and the cancellation would be incomplete. For trans-oceanic swell both conditions hold with large margins (Remark 2).

## D. Time-scale separation and local validity

The Green-Kubo formula (defined formally in Section F below, Eq. S.58) is derived under a stationary reference measure, yet the swell amplitude decays along the ray at rate  $\Gamma$ . As noted in A5, no joint global steady state of  $(\{a_{\mathbf{k}}\}, \boldsymbol{\omega}')$  exists. The resolution rests on a three-level time-scale hierarchy and on a local application of the Green-Kubo relation. The force autocorrelation  $C_F(\tau)$  is supported on  $\tau_c \sim 5$  s (A2). For the Green-Kubo integral to be evaluated under a locally stationary bath, the turbulent statistics—principally the dissipation rate  $\varepsilon$ —must remain approximately constant over each such window. The relevant time scale is the *persistence* time  $\tau_{\text{NESS}}$ , i.e. the time over which the wind-driven mixed layer maintains its current statistical state at a fixed point on the ocean surface. A trans-oceanic swell ray typically spans 10 000–15 000 km and traverses several distinct climate zones: the mid-latitude storm belt where the swell is generated, the subtropical high-pressure belt, the trade-wind region, and possibly the opposite-hemisphere storm track. Among these, the shortest persistence arises in the mid-latitude storm tracks, where synoptic-scale weather systems have characteristic horizontal extent  $L_{\text{syn}} \sim 10^3$  km and propagation speed  $V_{\text{syn}} \sim 10$  m s $^{-1}$  [33], giving

$$\tau_{\text{NESS}} \sim \frac{L_{\text{syn}}}{V_{\text{syn}}} \sim \frac{10^6 \text{ m}}{10 \text{ m s}^{-1}} \sim 10^5 \text{ s} \sim 1 \text{ day}. \quad (\text{S.47})$$

In the trade-wind belt and subtropical highs, surface wind conditions persist on time scales of weeks or longer, so the mid-latitude estimate provides a *lower bound* on  $\tau_{\text{NESS}}$  along the entire ray. Even this most conservative value yields

$$\frac{\tau_c}{\tau_{\text{NESS}}} \sim 10^{-4}, \quad (\text{S.48})$$

providing four orders of magnitude of margin. Over each short correlation window the bath may be treated as stationary, with an  $\varepsilon$  that is effectively constant on that window. The same hierarchy applied to the wave sector ensures that  $E_{\mathbf{k}}$  is quasi-constant over each correlation window. The fractional energy change per window is

$$\tau_c \Gamma \lesssim 10^{-5} \quad (\text{using } \Gamma \sim 10^{-6} \text{ s}^{-1} \text{ from Sections S3-S5}), \quad (\text{S.49})$$

analogous to the Born-Oppenheimer separation of fast and slow degrees of freedom. Locally in time, we evaluate  $\Gamma(\mathbf{k}; \varepsilon)$  from the instantaneous bath state and interpret it as the coefficient in a local equation

$$\frac{dE_{\mathbf{k}}}{dt} = -2\Gamma(\varepsilon(t), \mathbf{k}) E_{\mathbf{k}}(t), \quad (\text{S.50})$$

which is the starting point for the path-averaged effective dissipation constructed in Section S5. On longer times  $\varepsilon$  varies along the ray, making  $\Gamma = \Gamma(\varepsilon(t), \mathbf{k})$  slowly time-dependent. At each instant the local Green-Kubo construction applies, and the cumulative effect is obtained by integrating Eq. (S.50) (Section S5).

## E. Projected dynamics and identification of the stochastic vortex force

We construct the projected dynamics and identify the microscopic force entering Eq. (S.31).

### E.1. Generalised Langevin equation

In the Hilbert space  $\mathcal{H} = L^2(\rho_{\text{ss}})$  with inner product (S.38), where elements are phase-space observables  $A(\mathbf{X})$ , the orthogonal projection onto the swell subspace is

$$\mathcal{P}A = \sum_{\mathbf{k} \in \mathcal{B}} \frac{\langle A, a_{\mathbf{k}} \rangle_{\rho}}{\langle a_{\mathbf{k}}, a_{\mathbf{k}} \rangle_{\rho}} a_{\mathbf{k}}, \quad \mathcal{Q} = 1 - \mathcal{P}. \quad (\text{S.51})$$

By factorisation (A5(ii)),  $\langle a_{\mathbf{k}}, a_{\mathbf{k}} \rangle_{\rho} = \langle |a_{\mathbf{k}}|^2 \rangle = 2E_{\mathbf{k}}$ . The microscopic amplitude equation can be written schematically as

$$\dot{a}_{\mathbf{k}}(t) = i \sum_{\mathbf{k}'} \Omega_{\mathbf{k}\mathbf{k}'} a_{\mathbf{k}'}(t) + \mathcal{F}_{\mathbf{k}}(t), \quad (\text{S.52})$$

where  $\Omega_{\mathbf{k}\mathbf{k}'}$  is the linear frequency matrix (intrinsic dispersion plus Craik-Leibovich mean-flow corrections) and  $\mathcal{F}_{\mathbf{k}}$  collects all remaining nonlinear coupling terms. The Mori-Zwanzig projection converts this into an exact generalised Langevin equation

$$\dot{a}_{\mathbf{k}}(t) = i \sum_{\mathbf{k}'} \Omega_{\mathbf{k}\mathbf{k}'} a_{\mathbf{k}'}(t) - \int_0^t K_{\mathbf{k}}(t-s) a_{\mathbf{k}}(s) ds + F_{\mathbf{k}}(t), \quad (\text{S.53})$$

where  $F_{\mathbf{k}}(t) = e^{i\mathcal{Q}\mathcal{L}t} \mathcal{Q}\mathcal{F}_{\mathbf{k}}(0)$  is the fluctuating force propagated entirely in the orthogonal subspace. The memory kernel is diagonal in wavevector,  $K_{\mathbf{k}\mathbf{k}'}(\tau) = K_{\mathbf{k}}(\tau) \delta_{\mathbf{k}\mathbf{k}'}$ , as a consequence of the spatial homogeneity assumed in A3: the  $\rho_{\text{ss}}$ -weighted cross-correlations between distinct  $\mathbf{k}$ -modes vanish, so the Mori-Zwanzig memory matrix reduces to a scalar kernel for each mode. By construction and the factorisation A5(ii), the fluctuating force satisfies

$$\mathcal{P}F_{\mathbf{k}}(t) = 0, \quad \langle F_{\mathbf{k}}, a_{\mathbf{k}} \rangle_{\rho} = 0, \quad \langle F_{\mathbf{k}}(t) a_{\mathbf{k}}^*(s) \rangle = 0 \quad (s \leq t). \quad (\text{S.54})$$

## E.2. Stochastic vortex force as the microscopic coupling

In Section S1 the physical wave-vorticity coupling was decomposed into three pieces:  $\mathbf{u}_{\phi} \times \bar{\boldsymbol{\Omega}}$  (coupling to the ensemble-mean vorticity),  $\mathbf{u}_{\phi} \times \boldsymbol{\omega}_{\text{wave}}$  (wave self-interaction via the wave-slaved vorticity), and  $\mathbf{u}_{\phi} \times \boldsymbol{\omega}'$  (coupling to the turbulent vorticity fluctuation). The energy-budget analysis there showed that only the last term, the stochastic vortex force

$$\mathbf{f}_{\text{svf}} = \mathbf{u}_{\phi} \times \boldsymbol{\omega}', \quad (\text{S.55})$$

permits irreversible energy transfer from swell to turbulence. The mean-vorticity term is reactive and does not enter the dissipative Green-Kubo real part. The wave-slaved term carries spectral support only at zero and double frequency and therefore does not project onto the swell mode. The Mori-Zwanzig noise  $F_{\mathbf{k}}(t)$ , defined by the  $\mathcal{Q}$ -projector, satisfies three defining properties. Zero projection onto the wave subspace, zero correlation with the wave amplitudes, and propagation entirely within the orthogonal subspace (Eq. S.54). At the field level, the SVF  $\mathbf{f}_{\text{svf}}$  satisfies the same three properties under A1-A5. Zero ensemble mean (A3(iii)), zero correlation with  $a_{\mathbf{k}}$  (A5(ii)), and autonomous temporal evolution governed by the turbulent cascade (A3(i)). Under the scale-separation and factorisation assumptions (A2-A5), the two selection procedures, Hilbert-space orthogonal projection and Navier-Stokes three-term decomposition, therefore isolate the same physical degrees of freedom. Fast, bath-dominated fluctuations orthogonal to the resolved wave amplitudes. The abstract noise can accordingly be written as the mode projection of the physical field,

$$F_{\mathbf{k}}(t) = \int d^3\mathbf{x} \boldsymbol{\psi}_{\mathbf{k}}^*(\mathbf{x}) \cdot \mathbf{f}_{\text{svf}}(\mathbf{x}, t), \quad (\text{S.56})$$

where  $\boldsymbol{\psi}_{\mathbf{k}}(\mathbf{x})$  is the linear velocity eigenfunction of mode  $\mathbf{k}$ , with the normalisation convention  $E_{\mathbf{k}} = \frac{1}{2}|a_{\mathbf{k}}|^2$  (Eq. S.32). Operationally,  $\boldsymbol{\omega}'$  is obtained in a turbulence-resolving simulation by subtracting the wave-slaved vorticity  $\boldsymbol{\omega}_{\text{wave}} = \nabla \times (\boldsymbol{\xi} \times \boldsymbol{\Omega}_{\text{s}})$  and the ensemble-mean  $\bar{\boldsymbol{\Omega}}$  from the total vorticity. The SVF is then formed as  $\mathbf{u}_{\phi} \times \boldsymbol{\omega}'$  and projected onto mode  $\mathbf{k}$  via (S.56). This identification is a *physical equivalence under A2-A5*, not an algebraic identity. The  $\mathcal{Q}$ -projector acts in observable space while  $\mathbf{f}_{\text{svf}}$  is defined at the field level, but the assumptions guarantee that both yield the same force autocorrelation  $C_F(\tau; \mathbf{k})$  and hence the same  $\Gamma(\mathbf{k})$ .

## F. Green-Kubo relation and non-negativity of $\Gamma$

With  $F_{\mathbf{k}}$  identified as the mode-projected SVF, FDR-II (S.39) can be written as

$$K_{\mathbf{k}}(\tau) = \frac{\langle F_{\mathbf{k}}(0) F_{\mathbf{k}}(\tau)^* \rangle}{2E_{\mathbf{k}}}. \quad (\text{S.57})$$

The Green-Kubo damping coefficient is then

$$\Gamma(\mathbf{k}) \equiv \int_0^\infty \text{Re}[K_{\mathbf{k}}(\tau)] d\tau = \frac{1}{2E_{\mathbf{k}}} \int_0^\infty \text{Re}[\langle F_{\mathbf{k}}(0) F_{\mathbf{k}}(\tau)^* \rangle] d\tau. \quad (\text{S.58})$$

The integral is convergent (A6). Stationarity here refers to the bath process conditional on quasi-frozen  $a_{\mathbf{k}}$  over  $\tau \lesssim \tau_c$  (A5(i)), not to the globally evolving coupled system. Because  $F_{\mathbf{k}}(t)$  is stationary with finite variance under this conditional measure, its autocorrelation is positive-definite in the sense of Bochner,

$$\sum_{j,\ell} \alpha_j \alpha_\ell^* C_F(t_j - t_\ell) \geq 0 \quad \text{for any finite set } \{t_j\}, \{\alpha_j\}, \quad (\text{S.59})$$

where  $C_F(\tau) = \langle F_{\mathbf{k}}(0) F_{\mathbf{k}}(\tau)^* \rangle$ . Bochner's theorem then implies that the power spectral density

$$S_F(\omega) = \int_{-\infty}^\infty C_F(\tau) e^{i\omega\tau} d\tau \quad (\text{S.60})$$

(we adopt the convention without  $2\pi$  prefactors) is non-negative for all  $\omega$ . By stationarity,  $C_F(-\tau) = C_F(\tau)^*$ , so  $S_F(0)$  is real,

$$S_F(0)^* = \int_{-\infty}^\infty C_F(\tau)^* d\tau = \int_{-\infty}^\infty C_F(-\tau) d\tau = S_F(0). \quad (\text{S.61})$$

The same symmetry allows the half-line integral in Eq. (S.58) to be extended to negative times:  $\text{Re}[C_F(-\tau)] = \text{Re}[C_F(\tau)]$ , hence  $\int_0^\infty \text{Re}[C_F(\tau)] d\tau = \frac{1}{2} S_F(0)$ , giving

$$\Gamma(\mathbf{k}) = \frac{S_F(0)}{4E_{\mathbf{k}}} \geq 0. \quad (\text{S.62})$$

Because  $C_F \in L^1(\mathbb{R})$  (A6, Section A), its Fourier transform  $S_F(\omega)$  is a bounded continuous function, so  $S_F(0)$  is finite. The autocorrelation of any second-order stationary process is positive-definite in the sense of (S.59). Since additionally  $\langle F_{\mathbf{k}} \rangle = 0$  (A3(iii)),  $C_F$  is a centred autocorrelation. The non-negativity of  $S_F(0)$ , and hence of  $\Gamma$ , then follows from Bochner's theorem.

**Theorem 1** (Non-negativity of  $\Gamma$ ). *Under A1, A3(i, iii), A5(i) and A6,*

$$\boxed{\Gamma(\mathbf{k}) \geq 0 \quad \text{for all } \mathbf{k} \in \mathcal{B}.} \quad (\text{S.63})$$

*The stochastic vortex force cannot, on average, amplify swell. Individual propagation paths can exhibit apparent growth due to fluctuations (Section H), but the Markovian coarse-grained decay rate is non-negative. In the Markovian limit (A2),  $\langle E_{\mathbf{k}}(t) \rangle$  decays monotonically for  $t \gg \tau_c$  (Section G, Eq. S.70).*

The sign  $\Gamma \geq 0$  is a purely kinematic property of stationary fluctuations. The Navier-Stokes content of the theory lies in identifying the correct microscopic force  $F_{\mathbf{k}}$  and in evaluating its zero-frequency spectrum  $S_F(0)$ . The proof uses the following assumptions. A1 defines the wave amplitudes  $a_{\mathbf{k}}$ . A3(i) (stationarity and homogeneity of  $\omega'$ ) and A5(i) (local stationarity of the bath reference measure at fixed  $a_{\mathbf{k}}$ ) guarantee that  $C_F(\tau)$  is time-translation invariant. A3(iii) (zero ensemble mean under the bath measure) ensures  $\langle F_{\mathbf{k}} \rangle = 0$ , so that  $C_F(\tau)$  is a centred

autocorrelation. A6 ensures that  $S_F(0)$  is finite. The non-negativity then follows from Bochner's theorem alone.

The following assumptions are *not* invoked in the sign proof. A2 (time-scale separation) enters only in the Markovian reduction (Section G). A3(ii) (phase decoupling) and A5(ii) (factorisation) enter only in the factorisation of  $\rho_{ss}$  and in the cancellation of  $E_{\mathbf{k}}$  from the denominator (Section C.4). A4 (linear truncation) affects the amplitude dependence of  $\Gamma$  but not its sign. The non-negativity theorem is both spectrum-agnostic (the form of  $E_{\omega}(q)$  does not enter the proof) and wave-type-agnostic (it applies equally to wind waves and young seas). What changes across wave types is the value of  $\Gamma$  and whether the SVF damping can be isolated from competing processes (Section S9). The degeneracy  $\Gamma(\mathbf{k}) = 0$  would require a fine-tuned cancellation  $S_F(0) = 0$  between positive and negative lobes of  $C_F(\tau)$ . For a propagating wave packet that samples independent eddies, such cancellation is non-generic. The finite parameter  $\delta = u'/c_g > 0$  ensures that each eddy evolves during the encounter time, breaking microscopic time-reversal symmetry and producing a strictly positive zero-frequency spectral density (Section I).

### G. Markovian limit and monotonic energy decay

Under A2 the memory kernel  $K_{\mathbf{k}}(\tau)$  decays on  $\tau_c \ll \Gamma^{-1}$ . On times  $t \gg \tau_c$  the amplitude varies negligibly over the support of  $K$ , so

$$\int_0^t K_{\mathbf{k}}(\tau) a_{\mathbf{k}}(t - \tau) d\tau \approx \Gamma(\mathbf{k}) a_{\mathbf{k}}(t) + i \Delta\omega_{\mathbf{k}} a_{\mathbf{k}}(t), \quad (\text{S.64})$$

where we have split the integral into real and imaginary parts,

$$\Gamma(\mathbf{k}) = \int_0^{\infty} \text{Re}[K_{\mathbf{k}}(\tau)] d\tau, \quad \Delta\omega_{\mathbf{k}} = \int_0^{\infty} \text{Im}[K_{\mathbf{k}}(\tau)] d\tau. \quad (\text{S.65})$$

The frequency shift  $\Delta\omega_{\mathbf{k}}$  can be absorbed into the dispersion relation. For swell,  $|\Delta\omega|/\omega \sim \delta^2 \sim 10^{-6}$ - $10^{-4}$ , undetectable in practice. Substituting (S.64) into the GLE (S.53) yields

$$\dot{a}_{\mathbf{k}} = i(\omega_{\mathbf{k}} + \Delta\omega_{\mathbf{k}}) a_{\mathbf{k}} - \Gamma(\mathbf{k}) a_{\mathbf{k}} + F_{\mathbf{k}}(t), \quad (\text{S.66})$$

where for clarity we have suppressed the coupling to nearby  $\mathbf{k}'$  in the intrinsic dispersion. Multiplying (S.66) by  $a_{\mathbf{k}}^*$ , adding the complex conjugate, and ensemble-averaging gives

$$\begin{aligned} \frac{d}{dt} \langle |a_{\mathbf{k}}|^2 \rangle &= 2 \text{Re} \langle a_{\mathbf{k}}^* \dot{a}_{\mathbf{k}} \rangle \\ &= 2 \text{Re} \left[ i(\omega_{\mathbf{k}} + \Delta\omega_{\mathbf{k}}) \langle |a_{\mathbf{k}}|^2 \rangle - \Gamma(\mathbf{k}) \langle |a_{\mathbf{k}}|^2 \rangle + \langle a_{\mathbf{k}}^* F_{\mathbf{k}} \rangle \right]. \end{aligned} \quad (\text{S.67})$$

The first term is purely imaginary, so its real part vanishes. The third term vanishes by the orthogonality  $\langle a_{\mathbf{k}}^* F_{\mathbf{k}} \rangle = 0$  (Eq. S.54). Using  $\langle |a_{\mathbf{k}}|^2 \rangle = 2E_{\mathbf{k}}$  we obtain

$$\frac{d}{dt} \langle E_{\mathbf{k}}(t) \rangle = -2\Gamma(\mathbf{k}) \langle E_{\mathbf{k}}(t) \rangle, \quad (\text{S.68})$$

with solution

$$\langle E_{\mathbf{k}}(t) \rangle = E_{\mathbf{k}}(0) e^{-2\Gamma(\mathbf{k})t}. \quad (\text{S.69})$$

Since  $\Gamma \geq 0$ ,

$$\frac{d}{dt} \langle E_{\mathbf{k}}(t) \rangle \leq 0 \quad \text{for all } t \gg \tau_c. \quad (\text{S.70})$$

The Markov approximation is controlled by the ratio  $\tau_c/\Gamma^{-1}$ . With  $\tau_c \sim \ell/c_g \sim 5$  s (Section A), the small parameter

$$\delta = \frac{u'}{c_g} \sim \frac{\tau_c}{\tau_q} \Big|_{q \sim k} \sim 10^{-3}$$
- $10^{-2}$  (S.71)

simultaneously gives the turbulence-to-wave velocity ratio and, by the Kolmogorov relation  $\varepsilon \sim u^3/\ell$ , the ratio of the advective decorrelation time to the eddy turnover time  $\tau_q \sim (\varepsilon q^2)^{-1/3}|_{q \sim k}$ . The finite but small value of  $\delta$  has a dual role. It ensures that the Markov approximation is accurate, with  $\tau_c/\Gamma^{-1} \lesssim 10^{-3}$  even in extreme conditions (the explicit dependence  $\Gamma(\delta, \varepsilon, k)$  is derived in Sections S3-S5), and it provides the causal phase lag responsible for strict positivity  $\Gamma > 0$  (Section I). Beyond the Markov limit, the GLE and FDR-II remain exact and define a frequency-dependent damping  $\hat{\Gamma}(\omega) = \text{Re} \int_0^\infty K_{\mathbf{k}}(\tau) e^{i\omega\tau} d\tau$ . For trans-oceanic swell the extreme smallness of  $\delta$  makes any departure from pure exponential decay negligible.

The non-negativity theorem holds for surface gravity waves propagating through turbulence. The closed-form scaling law requires additionally the weak-coupling and phase-decoupling conditions that characterise remote swell. A detailed analysis of the three dissipation channels and the domain of validity is given in Section S9.

## H. Dual-line prediction structure

The Mori-Zwanzig projection fixes both the mean damping and the residual noise. For the band-integrated swell energy  $E_w = \sum_{\mathbf{k} \in \mathcal{B}} E_{\mathbf{k}}$ , the Markovian coarse-grained dynamics can be written as

$$\frac{dE_w}{dt} = -2\Gamma E_w + \tilde{\eta}(t), \quad (\text{S.72})$$

where  $\tilde{\eta}(t)$  is a zero-mean stochastic forcing inherited from  $F_{\mathbf{k}}$ . FDR-II constrains its autocorrelation: the noise diffusivity  $D_E = 4\Gamma E_w^2$  is locked to the same Green-Kubo kernel that fixes the mean decay, so no additional parameter enters. Ensemble averaging removes  $\tilde{\eta}$  and recovers Eq. (S.68). Converting to a spatial decay rate gives  $\mu_E(\omega) = 2\Gamma/c_g$ . Along a single satellite track, however, the integrated noise produces order-one relative fluctuations in the apparent rate  $\hat{\mu}$ . Because  $\hat{\mu}$  is a log-energy regression slope while the dynamics are multiplicative, the pathwise estimator acquires an Itô correction,  $\langle \hat{\mu} \rangle = 2\mu_E$ . In the idealised near-independent-encounter limit (Section S6),

$$\text{Var}(\hat{\mu}) = \frac{2\mu_E}{L}, \quad c_0 \equiv \frac{\text{Var}(\hat{\mu})}{\langle \hat{\mu} \rangle / L} = 1, \quad (\text{S.73})$$

with  $L$  the path length, and the fraction of tracks with apparent negative attenuation is  $P(\hat{\mu} < 0) = \Phi(-\sqrt{2\mu_E L})$ , where  $\Phi$  is the standard normal CDF. For trans-oceanic swell  $\mathcal{S} = \mathcal{O}(1)$ , predicting a substantial minority of negative pathwise estimates-consistent with 13.3% (19) and  $\sim 24\%$  (34). The full derivation, including the passage from the mode-sum to a scalar noise and the explicit evaluation of the constants 2, 2 and 1, is given in Section S6.

## I. Physical origin of irreversibility: the single wave-eddy encounter

Bochner's theorem guarantees  $\Gamma \geq 0$  whenever the force process is stationary (Section F). That  $\Gamma > 0$  strictly requires a physical argument. The bath element must possess internal degrees of freedom that prevent the wave-eddy interaction from being elastic.

### I.1. Encounter kinematics and modal energy exchange

The modal energy change during a single wave-eddy encounter of duration  $\tau_{\text{adv}} \sim \ell/c_g \sim 1/(q c_g)$  is

$$\Delta E_{\mathbf{k}} = \text{Re} \int_0^{\tau_{\text{adv}}} a_{\mathbf{k}}^*(t) F_{\mathbf{k}}(t) dt, \quad (\text{S.74})$$

which can be positive or negative for any given encounter, depending on the instantaneous configuration of  $\omega'$ .

## I.2. Frozen-eddy limit and the physical origin of irreversibility

In the quasi-frozen limit where  $\omega'$  does not evolve during the encounter ( $\tau_{\text{adv}} \ll \tau_{\text{eddy}}$  with  $\delta \rightarrow 0$ ), a frozen but spatially inhomogeneous vorticity field can still exert a nonzero instantaneous force on the propagating wave packet. Along a given realisation,  $F_{\mathbf{k}}(t)$  need not vanish, and the packet may undergo conservative redistribution of wave action among neighbouring wavevectors. That process is a within-wave-sector rearrangement, not the irreversible dissipation rate  $\Gamma(\mathbf{k})$  defined by the Green-Kubo projection. The quantity  $\Gamma(\mathbf{k})$  in Eq. (S.58) measures irreversible energy transfer from the wave field to the rotational bath, as enforced by the energy budget (Eq. S.9). In the strictly frozen-bath limit, the bath has no internal evolution during the encounter and therefore cannot absorb and retain net energy from the wave. Conservative mode-to-mode redistribution within the wave sector does not contribute to the positive-definite friction coefficient. Irreversibility requires the eddy to evolve during the encounter, providing the microscopic mechanism by which energy absorbed from the wave is redistributed among internal bath degrees of freedom before the wave phase returns. The characteristic evolution time of an inertial-range eddy is the Kolmogorov turnover time

$$\tau_{\text{eddy}}(q) \sim (\varepsilon_{\text{eff}} q^2)^{-1/3}, \quad (\text{S.75})$$

which measures how long it takes for the eddy to lose memory of its initial configuration through the turbulent cascade. For far-field conditions with  $\varepsilon_{\text{eff}} \sim 5 \times 10^{-7} \text{ m}^2 \text{ s}^{-3}$  (Section S5 E, wall-law profile under  $U_{10} \approx 10 \text{ m s}^{-1}$ ) and  $q \sim k \approx 0.02 \text{ rad m}^{-1}$ ,  $\tau_{\text{eddy}} \sim 1.7 \times 10^3 \text{ s}$  ( $\approx 30 \text{ min}$ ). The ratio of the two time scales defines the key small parameter, recalling the key small parameter (Eq. S.71),  $\delta \equiv \tau_{\text{adv}}/\tau_{\text{eddy}} \sim u'/c_g \sim 10^{-3}\text{-}10^{-2}$ .

Here  $u'(q) \sim (\varepsilon_{\text{eff}}/q)^{1/3}$  is the Kolmogorov velocity at the swell-selected eddy scale. Since  $\varepsilon_{\text{eff}}$  varies along the swell ray with local forcing conditions (Section S5 E), the small parameter spans from  $\delta \sim 2 \times 10^{-3}$  in light-wind regions ( $\varepsilon_{\text{eff}} \sim 5 \times 10^{-7}$ ) to  $\delta \sim 10^{-2}$  in moderate-wind regions ( $\varepsilon_{\text{eff}} \sim 10^{-5}$ ).

## I.3. Encounter-level energy statistics and the bias-to-fluctuation ratio

The modal energy change  $\Delta E_{\mathbf{k}}$  fluctuates from encounter to encounter. To estimate its magnitude we scale the mode-projected force  $F_{\mathbf{k}} \sim U_0 |\omega'| \sim U_0 u'/\ell$  (orbital speed times vorticity at scale  $\ell$ ) and multiply by the amplitude times the advective decorrelation time  $\tau_{\text{adv}} \sim \ell/c_g$ . The resulting fluctuation amplitude of the energy change per encounter is

$$\sigma_{\Delta E} \sim U_0 \frac{u'^2}{\ell} \frac{\ell}{c_g} = \frac{U_0 u'^2}{c_g}, \quad (\text{S.76})$$

where  $U_0 = a\omega$  is the surface orbital speed. In the quasi-frozen limit  $\langle \Delta E_{\mathbf{k}} \rangle = 0$  and the encounter is elastic. During the advective decorrelation time  $\tau_{\text{adv}}$ , however, the eddy's vorticity evolves by a fraction  $\Delta\omega'/\omega' \sim \tau_{\text{adv}}/\tau_{\text{eddy}} = \delta$ : the configuration sampled at the end of the interval differs from that at the beginning by  $\mathcal{O}(\delta)$ . This breaks the temporal symmetry of the force history, so the energy returned during the second half of the encounter falls short of that absorbed during the first half by a fraction  $\delta$ , and the systematic (mean) energy change per encounter is

$$|\langle \Delta E_{\mathbf{k}} \rangle| \sim \delta \sigma_{\Delta E} \sim \frac{U_0 u'^3}{c_g^2}. \quad (\text{S.77})$$

Equivalently, in terms of fractional modal energy, the mean loss per encounter is  $|\bar{\epsilon}| \sim E_{\mathbf{k}} \delta^2$  and the standard deviation is  $\sigma \sim E_{\mathbf{k}} \delta$ . The bias-to-fluctuation ratio per encounter is therefore

$$\boxed{\frac{|\langle \Delta E_{\mathbf{k}} \rangle|}{\sigma_{\Delta E}} \sim \delta = \frac{u'}{c_g} \sim 10^{-3}\text{-}10^{-2}}, \quad (\text{S.78})$$

confirming that each wave-eddy encounter is nearly symmetric. The systematic energy loss is suppressed relative to the fluctuations by the ratio of advective decorrelation time to eddy turnover time. That the sign of the bias is negative-energy flows from the wave to the turbulence follows from causality and is guaranteed by the non-negativity of the force power spectral density  $S_F(\omega) \geq 0$  (Section F). The two distinct roles of the time-scale hierarchy are worth emphasising: *advective decorrelation* ( $c_g \gg u'$ ) controls the *magnitude* of dissipation by setting  $\tau_{\text{eff}}$ , while the bath's *internal dynamics* ( $\tau_{\text{eddy}}$  finite) guarantee its *sign* by providing the causal phase lag. Neither alone suffices. Advection without internal evolution gives an elastic encounter ( $\langle \Delta E_{\mathbf{k}} \rangle = 0$ ). Internal evolution without advection gives an autocorrelation that does not decay along the ray, so the Green-Kubo integral does not converge.

### S3. Evaluating the force autocorrelation in wavenumber space

Since we consider isotropic turbulence interacting with a unidirectional swell, we write  $k = |\mathbf{k}|$  and suppress bold face on the swell wavevector throughout Sections S3 and S4. The turbulent wavevector  $\mathbf{q}$  remains three-dimensional until angular integration is performed. Every turbulent eddy that overlaps with the wave orbital layer exerts a random force on the swell mode. The damping rate  $\Gamma(k)$  is therefore a weighted integral over all turbulent scales, with the vorticity spectrum, the coupling geometry, and the decorrelation time along the ray setting the weight at each  $q$ .

Three facts convert the Green-Kubo time integral (S.58) into a time-free scaling law. First, advective sweeping at  $c_g \gg u'$  dominates eddy turnover, so the effective correlation time is purely kinematic,  $\tau_{\text{eff}}(q; k) = C_\tau / (q c_g)$ . Second, the Kolmogorov spectrum fixes the force variance at each shell through the vorticity spectrum  $E_\omega(q) = q^2 E_u(q) \propto \varepsilon^{2/3} q^{1/3}$ , windowed by the scale-selection function  $\mathcal{S}(q/k)$ . Third, deep-water kinematics absorb the remaining scales. Amplitude dependence cancels by linearity of the SVF, and the dispersion relation  $\omega^2 = gk$  converts  $\Gamma(k) \propto \varepsilon^{2/3} k^{1/3} / c_g$  into  $\mu_E(\omega) = C_{\text{tot}} \varepsilon^{2/3} g^{-7/3} \omega^{8/3}$ , with no microscopic time scale remaining.

#### A. The Green-Kubo starting point

The Green-Kubo relation derived in Section S2 gives the amplitude damping rate for a swell mode with wavenumber  $k$  as

$$\Gamma(k) = \frac{1}{2E_k} \int_0^\infty \Re[\langle F_k(0) F_k^*(t) \rangle] dt, \quad (\text{S.79})$$

where  $E_k = \frac{1}{2}|a_k|^2$  (convention of A1) and  $F_k(t)$  is the projection of the stochastic vortex force onto the swell mode,

$$F_k(t) = \int d^3\mathbf{x} \psi_k^*(\mathbf{x}) \cdot \mathbf{f}_{\text{svf}}(\mathbf{x}, t). \quad (\text{S.80})$$

Here  $\psi_k(\mathbf{x})$  is the normalised eigenfunction of the linear wave mode, with vertical structure  $\propto e^{kz}$  for deep-water waves. Throughout this section,  $a_k(t)$  denotes the slowly varying complex envelope of a narrowband wave packet centred at wavenumber  $k$ , not a global Fourier coefficient of the entire ocean surface. The mode function  $\psi_k$  is correspondingly understood as a wave-packet eigenfunction whose horizontal Fourier transform  $\tilde{\psi}_k(\mathbf{p})$  is sharply peaked at  $\mathbf{p} = \mathbf{k}$  with spectral width  $\Delta k \sim 1/L_{\text{env}} \ll k$  (where  $L_{\text{env}}$  is the packet length). The projection (S.80) therefore acts as a local spatial filter. It extracts the force component within the spectral bandwidth of the wave packet, not a single plane-wave Fourier coefficient that would enforce a strict  $\delta(\mathbf{q}_h)$  selection in the wavenumber convolution. This local-envelope interpretation is consistent with the Mori-Zwanzig framework of Section S2 and with the standard WKB/Wigner representation used in wave-action transport theory [6, 35]. The turbulent field is modelled as a homogeneous,

stationary random process characterised by its two-point spectrum  $S_u(q, \Omega)$ . Since  $\Gamma(k)$  depends only on the two-point forcing correlation, higher-order cumulants do not enter at leading order.

Because  $F_k \propto a_k$  (Section S2 C), the wave-energy factors in the numerator and denominator of (S.79) cancel exactly, making  $\Gamma(k)$  independent of the modal normalisation (Eq. S.46). The explicit Fourier-space calculations below are carried out in terms of  $F_k$ , retaining the  $1/(2E_k)$  prefactor. The cancellation of the modal amplitude is tracked via the dimensionless overlap factor  $C_E(k)$  defined in Section F.

## B. Force autocorrelation in wavenumber-frequency space

The fluctuating turbulent velocity admits the Fourier representation [36, 37]

$$\mathbf{u}'(\mathbf{x}, t) = \int \frac{d^3q}{(2\pi)^3} \int \frac{d\Omega}{2\pi} \hat{\mathbf{u}}'(\mathbf{q}, \Omega) e^{i(\mathbf{q}\cdot\mathbf{x} - \Omega t)}. \quad (\text{S.81})$$

For a statistically homogeneous and stationary field, the two-point correlation is

$$\langle \hat{u}'_i(\mathbf{q}, \Omega) \hat{u}'_j{}^*(\mathbf{q}', \Omega') \rangle = (2\pi)^4 \delta(\mathbf{q} - \mathbf{q}') \delta(\Omega - \Omega') P_{ij}(\hat{\mathbf{q}}) S_u(q, \Omega), \quad (\text{S.82})$$

where  $P_{ij}(\hat{\mathbf{q}}) = \delta_{ij} - \hat{q}_i \hat{q}_j$  enforces incompressibility and  $S_u(q, \Omega)$  is the four-dimensional velocity spectrum (energy density per unit  $d^3q d\Omega$ ). Integrating over frequency gives the three-dimensional spectrum  $S_u(q) = \int S_u(q, \Omega) d\Omega$  (energy density per unit  $d^3q$ , normalised so that  $\int S_u(q) d^3q = \frac{1}{2} \langle |\mathbf{u}'|^2 \rangle$ ). The corresponding isotropic one-dimensional spectrum is  $E_u(q) = 4\pi q^2 S_u(q)$ . In the inertial range,  $S_u(q, \Omega) = S_u(q) \chi(\Omega; q)$ , where  $\chi$  has width  $\omega_q \sim (\varepsilon q^2)^{1/3}$  and unit area. The SVF  $\mathbf{f}_{\text{svf}} = \mathbf{u}_\phi \times \boldsymbol{\omega}'$  couples the swell to every turbulent mode simultaneously. Under Fourier transform, the vorticity becomes  $\hat{\boldsymbol{\omega}}' = i\mathbf{q} \times \hat{\mathbf{u}}'$ . To expose the convolution structure we adopt a simplified linearly polarised orbital velocity,

$$\mathbf{u}_\phi(\mathbf{x}, t) = U_0 \hat{\mathbf{k}} e^{i(\mathbf{k}\cdot\mathbf{x} - \omega t)} + \text{c.c.}, \quad (\text{S.83})$$

where  $U_0 = a\omega$ . This monochromatic form is a controlled schematic representation of the overlap structure. It isolates the wavenumber-convolution geometry that determines which turbulent scales couple to the swell. The complete phase-averaged treatment with circularly polarised deep-water orbits (Section S5 A) yields the same geometric factor  $\tilde{G}_{\text{geom}} = 2/3$  for isotropic turbulence. Multiplying by the Fourier expansion of  $\boldsymbol{\omega}'$  and retaining the co-rotating contribution gives

$$\hat{\mathbf{f}}_{\text{svf}}(\mathbf{q}, \Omega) = iU_0 \hat{\mathbf{k}} \times (\mathbf{q} \times \hat{\mathbf{u}}'(\mathbf{q}, \Omega)), \quad (\text{S.84})$$

where the vortex-force mode resides at  $(\mathbf{k} + \mathbf{q}, \omega + \Omega)$ . Expanding via  $\mathbf{a} \times (\mathbf{b} \times \mathbf{c}) = \mathbf{b}(\mathbf{a} \cdot \mathbf{c}) - \mathbf{c}(\mathbf{a} \cdot \mathbf{b})$ ,

$$\hat{\mathbf{f}}_{\text{svf}}(\mathbf{q}, \Omega) = iU_0 [\mathbf{q}(\hat{\mathbf{k}} \cdot \hat{\mathbf{u}}') - \hat{\mathbf{u}}'(\hat{\mathbf{k}} \cdot \mathbf{q})]. \quad (\text{S.85})$$

The projected force (S.80) in Fourier space is

$$F_k(t) = \int \frac{d^3q}{(2\pi)^3} \int \frac{d\Omega}{2\pi} \tilde{\psi}_k^*(\mathbf{k} + \mathbf{q}) \cdot \hat{\mathbf{f}}_{\text{svf}}(\mathbf{q}, \Omega) e^{-i(\omega + \Omega)t}, \quad (\text{S.86})$$

where  $\tilde{\psi}_k(\mathbf{p})$  is sharply peaked at  $\mathbf{p} = \mathbf{k}$  in the horizontal, but has broad vertical support set by the depth eigenfunction  $e^{kz}$ . Because  $a_k(t)$  is a narrow-band envelope (not a strict plane-wave coefficient), the projection acts as a local spectral filter with finite horizontal bandwidth  $\Delta k \sim L_{\text{env}}^{-1} \ll k$ . The along-ray phase factor  $e^{-i(\Omega - \mathbf{q}\cdot\mathbf{c}_g)t}$  therefore weights the full range of locally overlapping eddy wavenumbers, not just  $\mathbf{q}_h = \mathbf{0}$ . As the wave packet advances at  $c_g$ , it sequentially samples turbulent structures at every horizontal wavenumber  $q_h$ . The residence time within each structure is  $\sim 1/(q_h c_g)$ , and the temporal memory window  $\mathcal{W}_\Omega$  (Eq. S.90 below) performs the resulting frequency selection. The overlap integral that emerges after the time

integration therefore runs over the full three-dimensional  $\mathbf{q}$  space, weighted by the depth overlap  $e^{2kz}$ , the temporal memory kernel, and the geometric vertex-not by the horizontal envelope bandwidth. A turbulent mode evaluated along the wave-packet trajectory  $\mathbf{x}(t) = \mathbf{x}_0 + \mathbf{c}_g t$  acquires the advected phase

$$e^{i(\mathbf{q}\cdot\mathbf{x}-\Omega t)}\big|_{\mathbf{x}=\mathbf{x}_0+\mathbf{c}_g t} = e^{i\mathbf{q}\cdot\mathbf{x}_0} e^{-i(\Omega-\mathbf{q}\cdot\mathbf{c}_g)t}, \quad (\text{S.87})$$

so the effective frequency seen by the packet is  $\Omega_{\text{eff}} = \Omega - \mathbf{q} \cdot \mathbf{c}_g$ . The force autocorrelation  $\langle F_k(0) F_k^*(t) \rangle$  involves two integrals over  $(\mathbf{q}, \Omega)$ . The turbulent correlation (S.82) collapses one via the delta functions, and the tensor contraction defines a scalar vertex  $|V(\mathbf{q}; k)|^2$ ,

$$\langle F_k(0) F_k^*(t) \rangle = \int d^3q \int d\Omega |V(\mathbf{q}; k)|^2 S_u(q, \Omega) e^{-i(\Omega-\mathbf{q}\cdot\mathbf{c}_g)t}. \quad (\text{S.88})$$

Inserting into the Green-Kubo relation (S.79) and performing the time integral-which converges because the force autocorrelation has finite memory (A6)-yields

$$\boxed{\Gamma(k) = \frac{1}{2E_k} \int d^3q \int d\Omega S_u(q, \Omega) |V(\mathbf{q}; k)|^2 \mathcal{W}_\Omega(\Omega - \mathbf{q} \cdot \mathbf{c}_g)}, \quad (\text{S.89})$$

where the *temporal memory window*

$$\mathcal{W}_\Omega(\Delta\Omega) \equiv \text{Re} \int_0^\infty e^{-t/\tau_{\text{eff}}} e^{-i\Delta\Omega t} dt = \frac{\tau_{\text{eff}}^{-1}}{\tau_{\text{eff}}^{-2} + \Delta\Omega^2} \quad (\text{S.90})$$

is a Lorentzian peaked at  $\Delta\Omega = 0$  with width  $\sim \tau_{\text{eff}}^{-1}$ . In the idealised infinite-memory limit  $\tau_{\text{eff}} \rightarrow \infty$ , the window reduces to the distributional form  $\pi\delta(\Delta\Omega)$ . The finite correlation time of the force process broadens this selection, concentrating contributions near the advective Doppler frequency without excluding any turbulent scale. Equation (S.89) sums contributions from every turbulent mode, weighted by the available energy  $S_u(q, \Omega)$ , the coupling geometry  $|V(\mathbf{q}; k)|^2$ , and the decorrelation weight  $\mathcal{W}_\Omega$ . Equation (S.89) therefore weights all locally overlapping turbulent modes through the same Doppler-shifted temporal memory kernel, rather than through a strict resonant matching rule. In the sections that follow, angular integrations over  $\mathbf{q}$  are absorbed into a geometric factor  $\tilde{G}_{\text{geom}}$  and a scale-selection window  $\mathcal{S}(q/k)$ . The remaining spectral integrals use the one-dimensional spectrum  $E_u(q) = 4\pi q^2 S_u(q)$ .

### C. Vortex-force vertex and angular integration

The vertex  $|V(\mathbf{q}; k)|^2$  governs the coupling strength between a turbulent Fourier mode and the swell. Choose coordinates with  $\hat{\mathbf{k}} = \mathbf{e}_x$  and let  $\mathbf{q}$  make angle  $\theta$  with the swell direction. Incompressibility requires  $\mathbf{q} \cdot \hat{\mathbf{u}}' = 0$ , so  $\hat{\mathbf{u}}'$  lies in the plane perpendicular to  $\hat{\mathbf{q}}$ . Constructing an orthonormal basis  $\{\hat{\mathbf{q}}, \mathbf{e}_1, \mathbf{e}_2\}$  with  $\mathbf{e}_1$  in the plane of  $\hat{\mathbf{k}}$  and  $\hat{\mathbf{q}}$ ,

$$\mathbf{e}_x = \cos\theta \hat{\mathbf{q}} + \sin\theta \mathbf{e}_1, \quad (\text{S.91})$$

and  $\hat{\mathbf{u}}' = u'_1 \mathbf{e}_1 + u'_2 \mathbf{e}_2$ . Applying the BAC-CAB identity to  $\hat{\mathbf{f}}_{\text{svf}} = \mathbf{u}_\phi \times (\mathbf{i}\mathbf{q} \times \hat{\mathbf{u}}')$  and evaluating the inner products gives

$$|\hat{\mathbf{f}}_{\text{svf}}|^2 = U_0^2 q^2 [u_1'^2 + u_2'^2 \cos^2\theta]. \quad (\text{S.92})$$

For isotropic turbulence,  $\langle u_1'^2 \rangle = \langle u_2'^2 \rangle = \frac{1}{2} u'^2(q)$ , so the vertex is

$$|V(\mathbf{q}; k)|^2 \propto U_0^2 q^2 g(\cos\theta), \quad g(\cos\theta) = \frac{1}{2}(1 + \cos^2\theta). \quad (\text{S.93})$$

Integrating over solid angle,  $\int d\Omega_q g = \frac{1}{2}(4\pi + \frac{4\pi}{3}) = \frac{8\pi}{3}$ , gives the direction-averaged vertex

$$\int d\Omega_q |V(\mathbf{q}; k)|^2 = U_0^2 q^2 G_{\text{geom}}, \quad G_{\text{geom}} = \frac{8\pi}{3}. \quad (\text{S.94})$$

We define the normalised geometric factor

$$\tilde{G}_{\text{geom}} \equiv \frac{G_{\text{geom}}}{4\pi} = \frac{2}{3}, \quad (\text{S.95})$$

which enters  $C_{\text{tot}}$  as an order-unity prefactor. The derivation above uses a linearly polarised orbital velocity as a pedagogical device. The full phase-averaged calculation with circularly polarised deep-water orbits (Section S5 A) yields the same value  $\tilde{G}_{\text{geom}} = 2/3$  for isotropic turbulence.

#### D. Scale-selection window

The kinematic vertex derived above shows that every turbulent Fourier mode couples to the swell with strength proportional to  $q^2$ , reflecting the curl in the vorticity definition. The net contribution of each mode to the damping rate, however, also depends on the spatial overlap between the eddy and the wave orbital layer. This depth-overlap geometry is captured by a dimensionless scale-selection window  $\mathcal{S}(q/k)$ , defined as the ratio of the depth-integrated mode-projected force variance to the bare kinematic vertex,

$$\boxed{\mathcal{S}\left(\frac{q}{k}\right) \equiv \frac{\text{depth-integrated } |F_k(\mathbf{q})|^2}{U_0^2 q^2 \tilde{G}_{\text{geom}}}}. \quad (\text{S.96})$$

By construction  $\mathcal{S}$  depends only on  $x \equiv q/k$  and satisfies  $\mathcal{S}(x) \propto x^2$  for  $x \ll 1$ ,  $\mathcal{S}(x) = \mathcal{O}(1)$  near  $x \sim 1$ , and  $\mathcal{S}(x) \lesssim C x^{-1}$  for  $x \gg 1$ . These asymptotic behaviours ensure convergence of the Green-Kubo integral at both ends. The effective vertex including depth overlap is

$$\boxed{|V(\mathbf{q}; k)|_{\text{eff}}^2 = U_0^2 q^2 \tilde{G}_{\text{geom}} \mathcal{S}\left(\frac{q}{k}\right)}. \quad (\text{S.97})$$

**Ultraviolet suppression from vertical penetration mismatch.** The wave orbital energy decays as  $|\mathbf{u}_\phi(z)|^2 \propto e^{2kz}$  with penetration depth  $\sim (2k)^{-1}$ . The depth-projection integral is

$$I(k, q_z) = \int_{-\infty}^0 dz e^{2kz} e^{iq_z z} = \frac{1}{2k - iq_z}, \quad |I|^2 = \frac{1}{4k^2 + q_z^2}. \quad (\text{S.98})$$

This suppresses eddies with  $q_z \gg k$ . Averaging  $|I|^2$  over the turbulent-wavenumber sphere, only a polar cap of angular width  $\Delta\theta \sim k/q$  contributes efficiently for  $q \gg k$ , yielding a floor  $\mathcal{S}(x) \lesssim C x^{-1}$ . In the oceanic mixed layer, turbulent enstrophy is further concentrated toward the surface by wave-breaking injection and Langmuir circulation [38, 39], steepening the suppression beyond this floor.

To establish unconditional convergence of the Green-Kubo integral, suppose  $|\mathbf{u}_\phi|^2 \propto e^{2kz}$ , the turbulence follows the Kolmogorov spectrum  $E_u \propto q^{-5/3}$ , and the effective decorrelation time satisfies  $\tau_{\text{eff}} \leq C_\tau (\varepsilon q^2)^{-1/3}$ . The three-dimensional integrand then has three factors. Spectrum  $S_u \propto q^{-11/3}$ , bare vertex  $\propto q^2$ , and depth projection  $|I|^2 = (4k^2 + q_z^2)^{-1}$ . The polar-angle integral  $\int_{-1}^1 d\zeta / (4k^2 + q^2 \zeta^2) \leq \pi / (2kq)$  bounds the radial integrand by  $\lesssim q^{-4/3}$ , which is integrable on  $[Q, \infty)$ . Comparing with the one-dimensional form identifies  $\mathcal{S}(x) \sim x^{-1}$  as the floor from depth projection alone. The parametric family  $\widehat{W}_\alpha(x) = x^2 / (1 + x^2)^\alpha$  with  $\alpha \in [2, 5/2]$  used in Section S5 B for sensitivity analysis incorporates environmental effects beyond the floor. The baseline  $\alpha = 2$  gives  $C_S = \pi/6 \approx 0.52$ , and  $C_S$  varies by a factor of 2.7 across the range, translating into only a factor of 1.4 in the predicted attenuation rate.

**Infrared suppression from Galilean invariance.** The behaviour  $\mathcal{S}(x) \propto x^2$  as  $x \rightarrow 0$  is not a modelling choice but a structural consequence of two conservation laws.

At  $\mathbf{q} = \mathbf{0}$  the turbulent velocity is spatially uniform and its vorticity vanishes, so  $F_k = 0$ . Galilean invariance ensures that a uniform current produces only a Doppler shift without changing the wave energy. This zeroth-order vanishing is already encoded in the bare vertex factor  $q^2$ .

At  $\mathcal{O}(q/k)$  the vorticity is nonzero and the vortex force is finite. Denoting by  $F_k^{(1)}$  the  $\mathcal{O}(q/k)$  component of the mode-projected force, a linearly varying current refracts the wave while conserving wave action at leading order [40]. The  $\mathcal{O}(q/k)$  force therefore drives only a reactive frequency shift along the ray—it enters the imaginary part of the self-energy, contributing to  $\Delta\omega_k$ , but not the dissipative real part  $\Gamma$ ,

$$\text{Re} \int_0^\infty \langle F_k^{(1)}(0) F_k^{(1)*}(t) \rangle dt = 0. \quad (\text{S.99})$$

At  $\mathcal{O}(q^2/k^2)$  the curvature of the current field induces genuine scattering that does not reverse upon transit, so

$$\boxed{\mathcal{S}(x) = \mathcal{O}(x^2) \quad \text{as} \quad x = q/k \rightarrow 0, \quad \text{i.e.} \quad \mathcal{S}(0) = \mathcal{S}'(0) = 0.} \quad (\text{S.100})$$

The total effective coupling for  $q \ll k$  therefore scales as  $|V_{\text{eff}}|^2 \propto q^4/k^2$ , with the bare vertex  $q^2$  and the window suppression  $(q/k)^2$  contributing equally to infrared convergence. Large eddies, despite their abundant Kolmogorov energy, contribute negligibly to swell dissipation.

To the authors' knowledge, the scale-selection window has not been derived explicitly in prior wave-turbulence interaction theories. Rapid distortion theory [41] treats  $\ell \ll \lambda_w$ , implicitly confirming ultraviolet convergence but not identifying  $\mathcal{S}(x)$ . The quasi-linear theory of McWilliams [6] evaluates the vortex force for a deterministic current at a single wavenumber, so spectral integration does not arise. WKB ray tracing [35] assumes  $q \ll k$ , where ultraviolet convergence is moot. The present analysis fills this gap.

### E. Frequency integration and the effective correlation time

For homogeneous, stationary turbulence the four-dimensional spectrum factors as [42]

$$S_u(q, \Omega) = S_u(q) \chi(\Omega; q), \quad \int_{-\infty}^{\infty} \chi(\Omega; q) d\Omega = 1. \quad (\text{S.101})$$

Inserting into Eq. (S.89) and performing the frequency integral yields

$$\Gamma(k) = \frac{1}{2E_k} \int d^3q S_u(q) |V(\mathbf{q}; k)|^2 \tau_{\text{eff}}(q; k), \quad (\text{S.102})$$

with

$$\tau_{\text{eff}}(q; k) = \int_{-\infty}^{\infty} \chi(\Omega; q) \mathcal{W}_\Omega(\Omega - \mathbf{q} \cdot \mathbf{c}_g) d\Omega. \quad (\text{S.103})$$

Equation (S.103) is the exact definition of the effective memory time. The Lorentzian parametrisation used for  $\mathcal{W}_\Omega$  in Eq. (S.90) is a convenient approximation whose width is set *a posteriori* by the dominant decorrelation mechanism, not assumed in advance. Two timescales compete inside this integral. The intrinsic eddy turnover time  $\tau_{\text{eddy}}(q) \sim (\varepsilon q^2)^{-1/3}$  measures how fast the eddy forgets its initial configuration through the cascade. The advective decorrelation time

$$\tau_{\text{adv}}(q) \sim \frac{1}{q c_g} \quad (\text{S.104})$$

is the time for the advected phase  $\exp(i\mathbf{q} \cdot \mathbf{c}_g t)$  in the force autocorrelation to accumulate an  $O(1)$  shift as the wave-energy trajectory traverses one correlation length  $q^{-1}$ . This is the

wave-propagation analogue of the Kraichnan-Tennekes random sweeping hypothesis [43, 44]. For oceanic swell,  $c_g \sim 10\text{-}30 \text{ m s}^{-1}$  exceeds  $u' \sim 0.01\text{-}0.1 \text{ m s}^{-1}$  by two to three orders of magnitude, so  $\tau_{\text{adv}} \ll \tau_{\text{eddy}}$  at every scale and advective sweeping governs the decorrelation throughout. The effective correlation time therefore reduces to

$$\tau_{\text{eff}}(q; k) \simeq \frac{C_\tau}{q c_g(k)}, \quad (\text{S.105})$$

where  $C_\tau = \int_0^\infty \mathcal{R}(s) ds$  is a dimensionless shape factor of order unity determined by the spatial correlation function of inertial-range eddies (Section C). The crossover wavenumber at which  $\tau_{\text{eddy}}$  and  $\tau_{\text{adv}}$  become comparable is  $q_* \sim \varepsilon/c_g^3 \sim 10^{-9} \text{ m}^{-1}$ , seven orders of magnitude below the swell wavenumber  $k \sim 10^{-2} \text{ m}^{-1}$ . The advective limit therefore holds at all scales that contribute to the Green-Kubo integral.

At the dominant coupling scale  $q \sim k$ , the eddy diameter  $\ell \sim \lambda$  is much smaller than the wave-packet envelope  $L_{\text{env}} \sim \mathcal{O}(10\lambda)$ , so the geometric overlap time  $\tau_{\text{transit}} \sim L_{\text{env}}/c_g$  far exceeds the wave period. The decorrelation time is set not by this overlap duration but by phase decorrelation. As the energy trajectory advances by one eddy diameter, the advected phase  $\exp(i\mathbf{q}_h \cdot \mathbf{c}_g t)$  completes an  $\mathcal{O}(1)$  rotation, and successive patches contribute to the Green-Kubo integral with randomised phases (Section A).

Two limiting models for the force decorrelation illuminate the physics. In the frozen-turbulence limit ( $\delta \ll 1$ ), the eddy does not evolve during the encounter and the force autocorrelation at scale  $q$  reduces to a spatial correlation sampled at rate  $c_g$ ,  $C_{F,q}(t) \approx C_{F,q}(0) \mathcal{R}(qc_g t)$ . The Green-Kubo integral then gives  $\tau_{\text{eff}} = C_\tau/(qc_g)$  directly. This is the model adopted throughout. An alternative retains the intrinsic temporal decay  $R(q, t) = \exp[-t/\tau_{\text{eddy}}(q)]$ , giving a Lorentzian weight

$$\int_0^\infty dt R(q, t) \cos(\mathbf{q}_h \cdot \mathbf{c}_g t) = \frac{\tau_{\text{eddy}}(q)}{1 + (\mathbf{q}_h \cdot \mathbf{c}_g)^2 \tau_{\text{eddy}}^2(q)}. \quad (\text{S.106})$$

In the sweep-dominated regime  $|\mathbf{q}_h \cdot \mathbf{c}_g| \tau_{\text{eddy}} \gg 1$ , this reduces to  $\propto \varepsilon^{1/3} q^{-4/3} c_g^{-2}$ , carrying a different  $q$ -scaling from the spatial-correlation result  $\propto q^{-1} c_g^{-1}$ . The two models describe different physics. The temporal-decay model treats the eddy as decaying exponentially, with advection modulating the phase. The spatial model treats the eddy as frozen, with decorrelation arising entirely from spatial sampling. For swell ( $\delta \sim 10^{-3}\text{-}10^{-2}$ ), the eddy barely evolves during the encounter and the frozen-field model is accurate to  $\mathcal{O}(\delta)$ . The temporal-decay model would apply in the opposite slow-probe limit  $\tau_{\text{adv}} \gg \tau_{\text{eddy}}$ , which does not hold for ocean swell.

## F. Reduced one-dimensional integral and modal normalisation

Combining the direction-averaged vertex (Eqs. (S.94) and (S.97)), the advection-dominated correlation time  $\tau_{\text{eff}} \simeq C_\tau/(qc_g)$  (Eq. (S.105)), and converting to the one-dimensional spectrum  $E_u(q) = 4\pi q^2 S_u(q)$ , the Green-Kubo expression (S.102) reduces to

$$\Gamma(k) = \frac{C_\tau \tilde{G}_{\text{geom}} C_E(k)}{2 c_g(k)} \int_0^\infty dq E_u(q) q \mathcal{S}\left(\frac{q}{k}\right). \quad (\text{S.107})$$

The dimensionless depth-overlap coefficient  $C_E(k)$  collects the dependence on the vertical structure and modal normalisation of the swell eigenfunction. For deep-water linear orbits  $\mathbf{u}_\phi(z) \propto e^{kz}$ , the depth-integrated orbital kinetic energy per unit horizontal area is

$$\int_{-\infty}^0 \langle |\mathbf{u}_\phi(z)|^2 \rangle_t dz = \frac{(a\omega)^2}{2k} = \frac{1}{2} a^2 g = E_k, \quad (\text{S.108})$$

using  $\omega^2 = gk$  and the convention  $E_k = \frac{1}{2}ga^2$  (equivalently  $\frac{1}{2}|a_k|^2$  under A1). The depth-overlap coefficient is defined as

$$C_E(k) \equiv \frac{\int_{-\infty}^0 \langle |\mathbf{u}_\phi(z)|^2 \rangle_t dz}{E_k} = 1 \quad (\text{deep-water linear orbits}). \quad (\text{S.109})$$

The cancellation works as follows. The surface-value ratio  $U_0^2/(2E_k) = \omega^2/g = k$  from the Green-Kubo normalisation and vertex is exactly compensated by the  $k^{-1}$  from the depth integral, leaving no residual  $k$ -dependence in the prefactor. Departures from the ideal exponential profile (finite depth, finite mixed-layer thickness, or modified orbital structure) renormalise  $C_E$  to an  $\mathcal{O}(1)$  value absorbed into  $C_{\text{tot}}$  in Section S5.

#### S4. From the force autocorrelation to the swell attenuation law

In the inertial subrange the velocity spectrum takes the Kolmogorov form [32]

$$E_u(q) = C_K \varepsilon_{\text{eff}}^{2/3} q^{-5/3}, \quad (\text{S.110})$$

with  $C_K \approx 1.5$  [37, 45]. For 14 s swell ( $k \approx 0.021 \text{ rad m}^{-1}$ ) in a typical mixed layer ( $L_0 \sim 10\text{-}100 \text{ m}$ , Kolmogorov microscale  $\eta \sim 1 \text{ mm}$ ), the separation  $\eta \ll k^{-1} \lesssim L_0$  places the swell-interacting eddies within the inertial subrange (Section S5 G). Inserting Eq. (S.110) into the one-dimensional Green-Kubo form (S.107) and changing variables  $x = q/k$  yields

$$\int_0^\infty dq q^{-2/3} \mathcal{S}\left(\frac{q}{k}\right) = k^{1/3} \int_0^\infty x^{-2/3} \mathcal{S}(x) dx \equiv k^{1/3} C_S, \quad (\text{S.111})$$

where  $C_S$  depends only on the shape of the scale-selection window. For the baseline model  $\mathcal{S}(x) = x^2/(1+x^2)^2$ ,  $C_S = \pi/6 \approx 0.52$  (Table S1 in Section S5 B gives other choices). Collecting all order-unity constants into  $C_\Gamma \equiv C_\tau C_K C_S \tilde{G}_{\text{geom}} C_E/2$ , with  $C_E = 1$  for deep-water exponential orbits (Eq. S.109), the temporal damping rate becomes

$$\Gamma(k) \simeq C_\Gamma \frac{\varepsilon_{\text{eff}}^{2/3}}{c_g(k)} k^{1/3}. \quad (\text{S.112})$$

Converting to spatial decay via  $\mu_E = 2\Gamma/c_g$  (the factor 2 reflects energy  $\propto$  amplitude<sup>2</sup>) and using  $c_g = \frac{1}{2}\sqrt{g/k}$  gives  $c_g^{-2} = 4k/g$ , so

$$\mu_E(k) = 8C_\Gamma \varepsilon_{\text{eff}}^{2/3} \frac{k^{4/3}}{g}. \quad (\text{S.113})$$

Substituting  $k = \omega^2/g$  yields the scaling law announced in the main text,

$$\mu_E(\omega) \simeq C_{\text{tot}} \varepsilon_{\text{eff}}^{2/3} g^{-7/3} \omega^{8/3}, \quad C_{\text{tot}} = 8C_\Gamma = 4C_K \tilde{G}_{\text{geom}} C_S C_\tau C_E. \quad (\text{S.114})$$

The  $\omega^{8/3}$  exponent combines  $k^{1/3}$  from the Kolmogorov spectrum at the swell-selected scale,  $k^1$  from the temporal-to-spatial conversion  $c_g^{-2} \propto k$ , and the deep-water dispersion relation  $k = \omega^2/g$ . The decomposition of  $C_{\text{tot}}$  into individually constrained factors is given in Section S5. The effective dissipation rate entering the law is the mode-weighted average over the wave-turbulence interaction layer,

$$\varepsilon_{\text{eff}}(k) \equiv \frac{\int_{-H_{\text{int}}}^0 \varepsilon(z) e^{2kz} dz}{\int_{-H_{\text{int}}}^0 e^{2kz} dz}, \quad (\text{S.115})$$

where  $H_{\text{int}}(k) = \min\{1/k, H_{\text{ml}}\}$ . The weights  $e^{2kz}$  reflect the decay of orbital energy with depth.  $\varepsilon_{\text{eff}}$  is therefore dominated by the upper  $\sim (2k)^{-1} \approx 15\text{-}40$  m of the water column. In Section S5 E the wall-law dissipation profile is substituted explicitly, with the depth coordinate measured downward ( $z \geq 0$ ) and kernel  $e^{-2kz}$ ; the two conventions are equivalent under  $z \rightarrow -z$ . Equation (S.114) is the closed-form consequence of the factorised Green-Kubo closure developed in this section. The  $\omega^{8/3}$  exponent is fixed by the Kolmogorov power counting, deep-water dispersion, and the advection-dominated memory time. Section S5 quantifies the order-unity uncertainty associated with the window shape, temporal correlator, and vertical structure, which affects only the prefactor.

## S5. Order-of-magnitude of the prefactor $C_{\text{tot}}$ and robustness of the Kolmogorov closure

The total prefactor in the swell attenuation coefficient decomposes as

$$C_{\text{tot}} = 4 C_K \tilde{G}_{\text{geom}} C_S C_\tau C_E. \quad (\text{S.116})$$

Each factor is evaluated in the subsections below. Under baseline assumptions the product evaluates to  $C_{\text{tot}} = 2\pi/3 \approx 2.09$ . Propagating the physically constrained ranges yields  $C_{\text{tot}} \in [1.10, 3.34]$  (assembled in Section H). The decomposition into  $C_S$ ,  $C_\tau$ ,  $C_E$  and  $\varepsilon_{\text{eff}}$  is a controlled factorised closure rather than an exact theorem when the depth structure of enstrophy depends explicitly on turbulent wavenumber. The purpose of this section is therefore twofold: to assign physically constrained order-unity ranges to each factor, and to show that the resulting uncertainty affects only the prefactor, not the  $\omega^{8/3}$  scaling exponent.

### A. The geometric vertex factor $\tilde{G}_{\text{geom}}$

The force-autocorrelation expression for the swell attenuation rate (Eq. (S.89)) contains the squared vortex-force vertex

$$|V(\mathbf{q}; k)|^2 \equiv \frac{1}{8\pi^2} \int_0^{2\pi} d\phi \int d\Omega_{\mathbf{q}} |\mathbf{u}_\phi(\phi) \times \boldsymbol{\omega}'(\mathbf{q})|^2, \quad (\text{S.117})$$

where the two integrations represent, respectively, an average over the wave phase  $\phi = kx - \omega t$  (one full cycle, normalised by  $2\pi$ ) and an average over the direction of the turbulent wavenumber  $\hat{\mathbf{q}}$  on the unit sphere (normalised by  $4\pi$ , appropriate for isotropic turbulence). The geometric vertex factor  $\tilde{G}_{\text{geom}}$  collects all purely kinematic contributions, so that

$$|V|^2 = \tilde{G}_{\text{geom}} U_0^2 \langle |\boldsymbol{\omega}'|^2 \rangle, \quad (\text{S.118})$$

with  $U_0 = a_k \omega_k$  the surface orbital speed and  $\langle |\boldsymbol{\omega}'|^2 \rangle$  the local enstrophy. Consider a monochromatic deep-water wave propagating along  $+\hat{\mathbf{x}}$  with wavenumber  $k$  and frequency  $\omega$ . At depth  $z \geq 0$  (measured downward from the surface) the orbital velocity is

$$\mathbf{u}_\phi(z, \phi) = U_0 e^{-kz} (\cos \phi \hat{\mathbf{x}} + \sin \phi \hat{\mathbf{z}}), \quad \phi = kx - \omega t. \quad (\text{S.119})$$

The motion is circularly polarised in the  $x$ - $z$  plane. Horizontal and vertical amplitudes are equal at every depth. The phase-averaged second-moment tensor is

$$M_{ij} \equiv \langle u_{\phi,i} u_{\phi,j} \rangle_\phi = \frac{U_0^2}{2} (\hat{x}_i \hat{x}_j + \hat{z}_i \hat{z}_j) = \frac{U_0^2}{2} (\delta_{ij} - \hat{y}_i \hat{y}_j), \quad (\text{S.120})$$

whose trace is  $M_{ii} = U_0^2$ . The vanishing of  $M_{yy}$  reflects the absence of any  $\hat{\mathbf{y}}$  component in deep-water orbits. This asymmetry is the root cause of the  $\{1, \frac{1}{2}, \frac{1}{2}\}$  vorticity weights derived

next. Let  $\boldsymbol{\omega}' = (\omega'_x, \omega'_y, \omega'_z)$  denote the turbulent vorticity. The vortex force  $\mathbf{F} = \mathbf{u}_\phi \times \boldsymbol{\omega}'$  has components

$$\mathbf{F} = U_0 \begin{pmatrix} -\sin \phi \omega'_y \\ \sin \phi \omega'_x - \cos \phi \omega'_z \\ \cos \phi \omega'_y \end{pmatrix}. \quad (\text{S.121})$$

Since  $\langle \mathbf{u}_\phi \rangle_\phi = \mathbf{0}$  for a monochromatic wave, the phase-averaged force vanishes identically,

$$\langle \mathbf{u}_\phi \times \boldsymbol{\omega}' \rangle_\phi = \langle \mathbf{u}_\phi \rangle_\phi \times \boldsymbol{\omega}' = \mathbf{0}, \quad (\text{S.122})$$

consistent with the identification of  $\mathbf{f}_{\text{svf}}$  as a zero-mean stochastic force (Section S1). The Green-Kubo relation (S.79), however, involves the autocorrelation  $\langle F_k(0) F_k^*(t) \rangle$ , a second-order quantity whose zero-lag value is set by the phase-averaged squared amplitude  $\langle |\mathbf{F}|^2 \rangle_\phi$ , which we evaluate. Expanding the squared norm gives

$$|\mathbf{F}|^2 = U_0^2 [\omega_y'^2 + \sin^2 \phi \omega_x'^2 + \cos^2 \phi \omega_z'^2 - 2 \sin \phi \cos \phi \omega_x' \omega_z']. \quad (\text{S.123})$$

The phase averages  $\langle \sin^2 \phi \rangle_\phi = \langle \cos^2 \phi \rangle_\phi = \frac{1}{2}$  and  $\langle \sin \phi \cos \phi \rangle_\phi = 0$  then give the central intermediate result,

$$\langle |\mathbf{u}_\phi \times \boldsymbol{\omega}'|^2 \rangle_\phi = U_0^2 \left[ \omega_y'^2 + \frac{1}{2} (\omega_x'^2 + \omega_z'^2) \right]. \quad (\text{S.124})$$

Equation (S.124) holds for arbitrary turbulence statistics. It depends only on the deep-water dispersion relation through the polarisation of  $\mathbf{u}_\phi$ . The origin of the unequal weights  $\{1, \frac{1}{2}, \frac{1}{2}\}$  for the components  $\{\omega_y', \omega_x', \omega_z'\}$  is purely geometric. The out-of-plane component  $\omega_y'$  is perpendicular to the orbital plane  $\text{span}\{\hat{\mathbf{x}}, \hat{\mathbf{z}}\}$  at every phase, so it always produces a force and enters with full weight. The component  $\omega_x'$ , by contrast, is parallel to  $\mathbf{u}_\phi$  when  $\phi = 0$  (no cross product) and perpendicular when  $\phi = \pi/2$  (maximal cross product). Averaging over the wave cycle yields a factor of one half. The same argument with  $x \leftrightarrow z$  applies to  $\omega_z'$ . For later use we note the equivalent tensor form obtained from the identity  $|\mathbf{a} \times \mathbf{b}|^2 = |\mathbf{a}|^2 |\mathbf{b}|^2 - (\mathbf{a} \cdot \mathbf{b})^2$ ,

$$\langle |\mathbf{u}_\phi \times \boldsymbol{\omega}'|^2 \rangle_\phi = M_{ii} \omega_j' \omega_j' - M_{ij} \omega_i' \omega_j' = U_0^2 |\boldsymbol{\omega}'|^2 - \frac{U_0^2}{2} (\omega_x'^2 + \omega_z'^2), \quad (\text{S.125})$$

which recovers Eq. (S.124) upon expanding  $|\boldsymbol{\omega}'|^2 = \omega_x'^2 + \omega_y'^2 + \omega_z'^2$ . For homogeneous, isotropic turbulence  $\langle \omega_x'^2 \rangle = \langle \omega_y'^2 \rangle = \langle \omega_z'^2 \rangle = \frac{1}{3} \langle |\boldsymbol{\omega}'|^2 \rangle$ . Substituting into Eq. (S.124),

$$\langle |\mathbf{u}_\phi \times \boldsymbol{\omega}'|^2 \rangle_{\phi, \text{iso}} = U_0^2 \langle |\boldsymbol{\omega}'|^2 \rangle \left[ \frac{1}{3} + \frac{1}{2} \left( \frac{1}{3} + \frac{1}{3} \right) \right] = \frac{2}{3} U_0^2 \langle |\boldsymbol{\omega}'|^2 \rangle, \quad (\text{S.126})$$

and comparing with Eq. (S.118) immediately yields

$$\tilde{G}_{\text{geom}}^{(\text{iso})} = \frac{2}{3}. \quad (\text{S.127})$$

As an independent check we re-derive the isotropic result in wavenumber space. For an isotropic vorticity field the spectral tensor is

$$\Phi_{ij}(\mathbf{q}) \equiv \langle \omega_i'(\mathbf{q}) \omega_j'^*(\mathbf{q}) \rangle = \frac{E_\omega(q)}{4\pi} (\delta_{ij} - \hat{q}_i \hat{q}_j), \quad (\text{S.128})$$

where  $E_\omega(q) = q^2 E_u(q)$  is the enstrophy spectrum. Combining Eq. (S.125) with (S.128), the phase-averaged vertex at a fixed turbulent-wavenumber direction  $\hat{\mathbf{q}}$  is  $g(\hat{\mathbf{q}}) = M_{ii} \Phi_{jj} - M_{ij} \Phi_{ij}$ . Writing  $A \equiv E_\omega/(4\pi)$ , we obtain

$$g(\hat{\mathbf{q}}) = AU_0^2 \left( \frac{3}{2} - \frac{1}{2} \hat{q}_y^2 \right). \quad (\text{S.129})$$

Integrating over the unit sphere ( $\int d\Omega_q = 4\pi$ ,  $\int \hat{q}_y^2 d\Omega_q = 4\pi/3$ ) and normalising by the spectral enstrophy  $\langle |\boldsymbol{\omega}'|^2 \rangle_q = 4\pi \text{Tr } \Phi = 8\pi A$  gives  $\tilde{G}_{\text{geom}} = (16\pi/3)/(8\pi) = 2/3$ , confirming the physical-space value (S.127). Mixed-layer turbulence is not perfectly isotropic. Vertical motions are suppressed relative to horizontal ones by buoyancy and the free surface [46, 47]. We model this through an axisymmetric vorticity variance tensor,

$$\langle \omega_x'^2 \rangle = \langle \omega_y'^2 \rangle \equiv \sigma_h^2, \quad \langle \omega_z'^2 \rangle \equiv \sigma_v^2, \quad \langle \omega_i' \omega_j' \rangle = 0 \quad (i \neq j), \quad (\text{S.130})$$

with the anisotropy ratio  $R_u \equiv u_h'/u_v' \approx \sigma_h/\sigma_v$  [48]. Inserting into Eq. (S.124) and normalising by  $\langle |\boldsymbol{\omega}'|^2 \rangle = 2\sigma_h^2 + \sigma_v^2$  gives

$$\tilde{G}_{\text{geom}}(R_u) = \frac{3R_u^2 + 1}{2(2R_u^2 + 1)}. \quad (\text{S.131})$$

As an independent verification we parametrise the directional enstrophy spectrum by  $S_\omega(\mathbf{q}) = [E_\omega(q)/(4\pi)][1 + \beta P_2(\cos \theta_q)]$  with  $P_2(x) = (3x^2 - 1)/2$ . The velocity anisotropy relates to the spectral parameter via

$$\beta = \frac{10(R_u^2 - 1)}{2R_u^2 + 1}. \quad (\text{S.132})$$

Evaluating the weighted solid-angle integral with the four angular moments ( $\int d\Omega = 4\pi$ ,  $\int P_2 d\Omega = 0$ ,  $\int \hat{q}_y^2 d\Omega = 4\pi/3$ ,  $\int \hat{q}_y^2 P_2 d\Omega = -4\pi/15$ ) and normalising recovers exactly Eq. (S.131). At  $R_u = 1$  (isotropy) we recover  $\tilde{G}_{\text{geom}} = 2/3$ . As  $R_u \rightarrow \infty$  (purely horizontal turbulence) the factor saturates at  $3/4$ , while  $R_u \rightarrow 0$  (purely vertical turbulence) gives  $1/2$ . Circular polarisation therefore confines  $\tilde{G}_{\text{geom}}$  to the narrow interval  $[1/2, 3/4]$ . For comparison, a hypothetical linearly polarised wave gives a wider range  $[1/2, 1]$ . In the upper ocean,  $R_u \sim 1\text{-}2$  [46, 47], over which  $\tilde{G}_{\text{geom}}$  varies from  $0.667$  to  $\simeq 0.722$ , an  $\mathcal{O}(8\%)$  shift. Two further effects, finite-depth elliptical polarisation and wind-swell obliquity, can each perturb  $\tilde{G}_{\text{geom}}$  by  $\sim 10\%$  for a single realisation, but average out over trans-basin propagation. We adopt  $\tilde{G}_{\text{geom}} = 2/3$  with a physical range  $[2/3, 3/4]$  for deep-water swell.

## B. The scale-selection constant $C_S$

The scale-selection window  $\mathcal{S}(q/k)$  derived in Section D enters the scaling law only through the dimensionless integral  $C_S = \int_0^\infty x^{-2/3} \mathcal{S}(x) dx$  (Eq. S.111). Its shape-peak at  $q \sim k$ , infrared growth  $\propto x^2$ , ultraviolet roll-off-is fixed by wave-eddy geometry. Its amplitude depends on the vertical distribution of mixed-layer enstrophy, parameterised here by a single exponent. Because every admissible window shares the same infrared ( $\mathcal{S} \propto x^2$ ) and ultraviolet ( $\mathcal{S} \lesssim Cx^{-1}$ ) asymptotics, the integrand  $x^{-2/3} \mathcal{S}(x)$  is unconditionally convergent at both ends and the change of variables  $x = q/k$  always extracts the factor  $k^{1/3}$  that produces the  $\omega^{8/3}$  exponent (Eq. S.111). Varying the window shape therefore changes only the numerical value of  $C_S$ , not the scaling law itself. We adopt the rational family

$$\widehat{W}_\alpha(x) = \frac{x^2}{(1 + x^2)^\alpha}, \quad \alpha \geq \frac{3}{2}, \quad (\text{S.133})$$

whose ultraviolet behaviour is  $\widehat{W}_\alpha \sim x^{2-2\alpha}$  as  $x \rightarrow \infty$ . The constraint  $\alpha \geq 3/2$  ensures convergence, matching the theorem-level floor  $\mathcal{S} \lesssim Cx^{-1}$  proved in Section D. Each value of  $\alpha$  corresponds to a distinct assumption about turbulent enstrophy depth structure. At  $\alpha = 3/2$  the enstrophy profile  $\chi_q(z)$  is independent of  $q$ , corresponding to a local-equilibrium cascade with depth-independent spectral shape ( $\chi_q \propto \varepsilon(z)^{2/3} \propto z^{-2/3}$ , so  $q$  and  $z$  separate completely and UV suppression arises solely from the angular-cap geometry). At  $\alpha = 2$  the profile acquires  $q$ -dependent depth confinement,  $\chi_q(z) \propto e^{-qz}$ , as expected when turbulence is injected at the surface by wave breaking and wind stress rather than locally by shear [38]. At  $\alpha = 5/2$  the

surface concentration is stronger still, as may arise, for example, from Langmuir circulations [10, 39].

**Table S1:** Scale-selection window comparison. Each row lists the ultraviolet behaviour, the physical assumption, the coupling constant  $C_S$ , the fraction captured by the band  $x \in [0.5, 2]$ , and the peak of the spectral contribution density  $x^{1/3}\widehat{W}(x)$ .

| Window                     | UV decay | Physical assumption                                    | $C_S$                | $[k/2, 2k]$ | $x_{\text{peak}}$ |
|----------------------------|----------|--------------------------------------------------------|----------------------|-------------|-------------------|
| $\alpha = 3/2$ (floor)     | $x^{-1}$ | Local-equilibrium cascade; $\chi_q$ independent of $q$ | 1.40                 | 35%         | 1.9               |
| $\alpha = 2$ (baseline)    | $x^{-2}$ | Surface-injected turbulence; $\chi_q \propto e^{-qz}$  | $\pi/6 \approx 0.52$ | 58%         | 1.2               |
| $\alpha = 5/2$             | $x^{-3}$ | Strong surface concentration                           | 0.31                 | 66%         | 0.9               |
| Top-hat $[\frac{1}{2}, 2]$ | cutoff   | Artificial (no UV tail)                                | 1.40                 | -           | $\sim 1$          |

**Analytical evaluation for  $\alpha = 2$ .** The substitution  $t = x^2$  converts the baseline integral to a Beta function,

$$C_S^{(\alpha=2)} = \int_0^\infty \frac{x^{4/3}}{(1+x^2)^2} dx = \frac{1}{2} B\left(\frac{7}{6}, \frac{5}{6}\right). \quad (\text{S.134})$$

With  $a + b = 2$  and the reflection formula  $\Gamma(z)\Gamma(1-z) = \pi/\sin(\pi z)$ ,

$$B\left(\frac{7}{6}, \frac{5}{6}\right) = \frac{1}{6} \Gamma\left(\frac{1}{6}\right) \Gamma\left(\frac{5}{6}\right) = \frac{\pi}{3 \sin(\pi/6)} = \frac{\pi}{3}, \quad (\text{S.135})$$

giving the exact result

$$\boxed{C_S^{(\alpha=2)} = \frac{\pi}{6} \approx 0.5236.} \quad (\text{S.136})$$

Between  $\alpha = 3/2$  (floor) and  $\alpha = 2$  (baseline),  $C_S$  varies by a factor of 2.7. Between the two physically motivated shapes  $\alpha = 2$  and  $5/2$  it varies by only a factor of 1.7. The near-coincidence  $C_S^{(\alpha=3/2)} \approx C_S^{(\text{top-hat})} = 1.40$  is accidental. The top-hat concentrates all weight inside  $[k/2, 2k]$ , while  $\alpha = 3/2$  has a modest peak ( $\widehat{W}(1) \approx 0.35$ ) but a fat UV tail-fully 65% of its integral comes from  $x > 2$ . The theorem floor therefore overestimates the UV contribution by attributing full inertial-range vorticity to depths where surface-injected turbulence has not penetrated.

The spectral contribution density  $x^{1/3}\widehat{W}_\alpha(x)$  peaks at  $x_{\text{peak}} = \sqrt{7/(6\alpha - 7)}$ , confirming that the dominant coupling shifts toward  $q \sim k$  as  $\alpha$  increases. For the physically motivated choices ( $\alpha \geq 2$ ), the band  $x \in [0.5, 2]$  captures 58-66% of the integral, confirming that wave-scale eddies dominate the energy transfer.

### C. The advective correlation factor $C_\tau$

After angular averaging and factorisation of the geometric vertex, the damping rate contains the effective correlation time

$$\tau_{\text{eff}}(q; k) \equiv \frac{C_\tau}{q c_g(k)}, \quad (\text{S.137})$$

where  $c_g(k)$  is the swell group velocity and  $C_\tau$  is dimensionless and of order unity. Remote swell propagates at  $c_g \sim 10\text{-}20 \text{ ms}^{-1}$ , far exceeding the turbulent velocity  $u'(q) \sim 0.01\text{-}0.1 \text{ ms}^{-1}$ . The wave-energy trajectory traverses one spatial period of each turbulent Fourier mode long before the eddy turns over ( $\tau_{\text{adv}}/\tau_{\text{eddy}} \sim 10^{-3}\text{-}10^{-2}$ ), so decorrelation is controlled by relative advection-the wave-propagation analogue of Kraichnan-Tennekes random sweeping [43, 44].

The correlation function for wavenumber shell  $q$  is  $C_{F,q}(t) \approx C_{F,q}(0) \mathcal{R}(q c_g t)$ , where  $\mathcal{R}(s)$  is a self-similar normalised spatial correlation with  $\mathcal{R}(0) = 1$ . Changing variables gives

$$C_\tau = \int_0^\infty \mathcal{R}(s) ds, \quad (\text{S.138})$$

which is necessarily of order unity. An exponential  $\mathcal{R}(s) = e^{-s}$  gives  $C_\tau = 1$ . A Gaussian  $e^{-s^2}$  gives  $C_\tau = \sqrt{\pi}/2 \approx 0.89$ . The broader Gaussian  $e^{-s^2/2}$  gives  $C_\tau \approx 1.25$ . The physical range is  $C_\tau \in [0.89, 1.25]$ , contributing  $\sim 20\%$  variation compared with the order-of-magnitude uncertainty in  $\varepsilon_{\text{eff}}$ . We adopt  $C_\tau = 1$  as the baseline.

#### D. The vertical-weighting factor $C_E$

The factor  $C_E$  relates the depth-integrated orbital kinetic energy to the modal energy per unit density,

$$C_E \equiv \frac{\int_{-\infty}^0 |\mathbf{u}_\phi(z)|^2 dz}{E_k} = 1 \quad (\text{deep water}). \quad (\text{S.139})$$

This is exact for  $\mathbf{u}_\phi(z) \propto e^{kz}$  with  $E_k = \frac{1}{2}ga^2$ . For the far-field deep-water swell regime considered throughout this work, deviations from the ideal exponential eigenfunction are negligible.

#### E. Effective dissipation rate and numerical baseline

Collecting all prefactors (Eq. S.114), the baseline values  $C_S = \pi/6$ ,  $C_\tau = 1$ ,  $C_E = 1$ ,  $\tilde{G}_{\text{geom}} = 2/3$  and  $C_K = 1.5$  give

$$C_\Gamma = \frac{C_\tau C_K C_S \tilde{G}_{\text{geom}} C_E}{2} \simeq 0.26, \quad C_{\text{tot}} = 8C_\Gamma = \frac{2\pi}{3} \simeq 2.09. \quad (\text{S.140})$$

The effective dissipation rate entering the scaling law is the depth-weighted average of  $\varepsilon(z)$  over the orbital layer. Equation (S.115) in Section S4 gives the formal definition over the full interaction layer; the operational form below restricts the lower limit to  $z_0$  (the breaking-layer exclusion depth) and works in the depth-downward convention used for dissipation profiles. With  $z \geq 0$  measured downward from the surface (equivalent to the  $z \leq 0$  convention of Sections S3-S4 under  $z \rightarrow -z$ ),

$$\varepsilon_{\text{eff}}(k) = \frac{\int_{z_0}^{H_{\text{ml}}} \varepsilon(z) e^{-2kz} dz}{\int_{z_0}^{H_{\text{ml}}} e^{-2kz} dz}, \quad (\text{S.141})$$

where the kernel  $e^{-2kz}$  reflects the orbital-energy decay with  $e$ -folding depth  $\delta_E = 1/(2k)$ . For 14 s swell ( $k \approx 0.021 \text{ m}^{-1}$ ),  $\delta_E \approx 24 \text{ m}$ . When  $H_{\text{ml}} \gg \delta_E$  and  $2kz_0 \ll 1$ ,

$$\varepsilon_{\text{eff}}(k) \approx 2k \int_{z_0}^\infty \varepsilon(z) e^{-2kz} dz \quad (\text{S.142})$$

to within a few percent. Since  $\varepsilon_{\text{eff}} \propto u_*^{(w)3} \propto C_D^{3/2}$  and  $\Gamma \propto \varepsilon_{\text{eff}}^{2/3}$ , the exponents cancel to give  $\Gamma \propto C_D$ . A fractional error in the drag coefficient translates one-to-one into  $\Gamma$ . Stress continuity across the air-sea interface gives

$$u_*^{(w)} = U_{10} \sqrt{C_D} \sqrt{\rho_a/\rho_w} \approx U_{10} \sqrt{C_D} \times 0.035, \quad (\text{S.143})$$

with  $\rho_a/\rho_w \approx 1.2 \times 10^{-3}$ . We adopt the COARE 3.5 parameterisation [49] as the baseline. At  $U_{10} = 10 \text{ m s}^{-1}$ , COARE 3.5 gives  $C_D \approx 1.15 \times 10^{-3}$  and  $u_*^{(w)} \approx 1.17 \times 10^{-2} \text{ m s}^{-1}$ . Alternative

bulk-flux formulations [50–52] give  $C_D$  from 1.08 to  $1.47 \times 10^{-3}$ , corresponding to  $\Delta\Gamma/\Gamma$  between  $-6\%$  and  $+28\%$ . For moderate winds ( $5 \leq U_{10} \leq 20 \text{ m s}^{-1}$ ), COARE 3.5 is well approximated by  $C_D \approx (0.065 U_{10} + 0.49) \times 10^{-3}$ . Below the wave-breaking layer ( $z > z_0$ ), the dissipation rate follows the law of the wall,

$$\varepsilon(z) = \frac{u_*^{(w)3}}{\kappa z}, \quad z > z_0 = c_b H_{s,w}, \quad (\text{S.144})$$

with  $\kappa = 0.4$  and  $c_b \approx 0.6$  ( $z_0 \approx 0.9 \text{ m}$  for  $H_s = 1.5 \text{ m}$ ). Substituting into (S.142) gives

$$\varepsilon_{\text{eff}}(k) = 2k \frac{u_*^{(w)3}}{\kappa} E_1(2k z_0), \quad (\text{S.145})$$

where  $E_1(x) = \int_x^\infty t^{-1} e^{-t} dt$ . For 14 s swell with  $z_0 = 0.9 \text{ m}$ ,  $2k z_0 \approx 0.037$  and  $E_1(0.037) \approx 2.76$ , giving

$$\varepsilon_{\text{eff}} \approx 2 \times 0.021 \times \frac{(1.17 \times 10^{-2})^3}{0.4} \times 2.76 \approx 4.6 \times 10^{-7} \text{ m}^2 \text{ s}^{-3}. \quad (\text{S.146})$$

The logarithmic approximation  $E_1(x) \approx -\gamma_E - \ln x$  for  $x \ll 1$  gives the closed form

$$\varepsilon_{\text{eff}} \approx 2k \frac{u_*^{(w)3}}{\kappa} [-\gamma_E - \ln(2k z_0)], \quad (\text{S.147})$$

with error less than 2% for  $2k z_0 < 0.1$ . The result is insensitive to  $z_0$ . A fourfold variation from 0.5 to 2.0 m changes  $\varepsilon_{\text{eff}}$  by a factor of  $\sim 1.7$ , following from the logarithmic dependence. The drag coefficient is typically the dominant source of uncertainty in large-scale applications.

Near-surface dissipation rates under active wind-wave breaking exceed the wall-law prediction by up to an order of magnitude. The Craig-Banner and Terray models [20, 21] parametrise the breaking-layer TKE flux as  $F_0 = \alpha u_*^{(w)3}$  with  $\alpha \sim 50$ -150, producing a three-layer vertical structure (Extended Data Fig. 2a). A constant-dissipation layer at  $z < z_b \approx 0.6 H_{s,w}$ , a power-law decay layer  $\varepsilon \propto z^{-\lambda}$  ( $\lambda \approx 1.5$ -2) extending to  $z_t \approx c_1 H_{s,w}$ , and an asymptotic return to wall-law scaling at greater depth [21, 53]. Here  $H_{s,w}$  is the significant height of the *local wind-wave* field that generates the breaking. For  $U_{10} = 10 \text{ m s}^{-1}$  the Pierson-Moskowitz limit gives  $H_{s,w} \approx 2.2 \text{ m}$ ,  $z_b \approx 1.3 \text{ m}$  and  $z_t \approx 9 \text{ m}$  (taking  $c_1 \approx 4$  from the wave-following observations of Thomson et al. 53, Sutherland and Melville 54). The resulting surface enhancement is a factor  $\sim 7$  relative to the wall-law.

The question is whether this enhancement should be included in  $\varepsilon_{\text{eff}}$ . Within the present factorised closure, doing so would effectively double-count the spectral filtering already performed by the scale-selection integral  $C_S$ . The full Green-Kubo damping coefficient is a coupled integral over eddy wavenumber  $q$  and depth  $z$  (Eq. S.148). The factored form  $\Gamma \propto C_S \varepsilon_{\text{eff}}^{2/3}$  is valid when the depth-weighted dissipation entering  $\varepsilon_{\text{eff}}$  is produced by eddies at wavenumbers  $q \sim k$  that receive full weight from the window  $\widehat{W}(q/k)$ . The wall-law profile, having no characteristic depth scale, satisfies this condition. The Kolmogorov inertial range at every depth feeds all wavenumbers  $q$  equally per unit log-interval, and the spectral integral  $C_S$  correctly selects the swell-scale contribution.

The breaking-generated eddies violate this condition. Their injection scales are set by the local wind-wave geometry:  $\ell_b \sim \mathcal{O}(H_{s,w}) \sim 2 \text{ m}$ , corresponding to wavenumbers  $q_b \sim 2\pi/\ell_b \sim 1$ -6  $\text{rad m}^{-1}$ . Relative to the swell wavenumber  $k \sim 0.02 \text{ rad m}^{-1}$ , this gives  $q_b/k \sim 50$ -300, deep in the ultraviolet tail of the window where  $\widehat{W}(q_b/k) \sim 4 \times 10^{-4}$  (Extended Data Fig. 2b). The scale-selection integral has already assigned these eddies a negligible weight. Including the same eddies a second time via a breaking-enhanced  $\varepsilon_{\text{eff}}$  while retaining the baseline  $C_S$  derived from the full spectral window would effectively count their contribution twice. An independent argument reinforces this conclusion. The eddy-turnover time in the breaking layer,  $\tau_b \sim \ell_b/u'_b \sim \mathcal{O}(T_{\text{wind wave}}) \sim 3$ -6 s, is comparable to the swell period, so these eddies do not

satisfy the frozen-field condition  $\tau_{\text{eddy}} \gg T_{\text{swell}}$  underlying the SVF framework (Assumption A2). They lie outside the theory's domain of validity.

To bound the residual sensitivity we nevertheless apply the physical-space coupling filter  $\mathcal{E}(\ell k) = (\ell k)^2/[1 + (\ell k)^2]$  to both the wall-law and Terray profiles, integrate with the orbital weight  $e^{-2kz}$ , and take the ratio. The result ranges from  $1.10\times$  at  $T = 12\text{ s}$  to  $1.02\times$  at  $T = 20\text{ s}$  (Extended Data Fig. 2c)-a residual bias of at most 10%, far smaller than the  $C_{\text{tot}}$  uncertainty ( $\times 3$ ). The wall-law baseline therefore provides the consistent baseline adopted here across the entire far-field swell band. The full three-panel analysis is presented in Extended Data Fig. 2.

## F. Self-consistency of window shape and dissipation profile

The factored form  $\Gamma = C_{\Gamma} \varepsilon_{\text{eff}}^{2/3} k^{1/3}/|c_g|$  is exact only when the depth and spectral integrals factorise, which requires the normalised enstrophy profile  $\chi_q(z)$  to be  $q$ -independent. When  $\chi_q(z) \propto e^{-qz}$  (as in the real ocean), the full Green-Kubo structure involves a coupled integral

$$\Gamma \propto \int dq q^{-2/3} \underbrace{\int dz e^{-2kz} \varepsilon(z)^{2/3} \chi_q(z)}_{\mathcal{I}(k,q)}, \quad (\text{S.148})$$

and  $\mathcal{I}(k, q)$  cannot be cleanly separated into a  $q$ -independent depth factor and a spectral window. The current treatment assigns the depth-mismatch effect to the window ( $\alpha = 2$ ) while computing  $\varepsilon_{\text{eff}}$  from the  $q$ -independent wall-law profile. Two approximation errors arise but partially compensate. First, by Jensen's inequality the linear depth-average  $\langle \varepsilon \rangle^{2/3}$  overestimates the correct  $\langle \varepsilon^{2/3} \rangle$  by a factor  $\lesssim 1.2$  for the wall-law profile. Second, the physical premise of  $\alpha = 2$  (surface-injected turbulence) implies near-surface  $\varepsilon$  exceeding the wall-law by a factor of  $\sim 2$ -3 [39], which would increase  $\varepsilon_{\text{eff}}^{2/3}$  by  $\sim 1.6$ , partially offsetting the window reduction from  $C_S = 1.40$  ( $\alpha = 3/2$ ) to  $\pi/6$  ( $\alpha = 2$ ). The net effect places the baseline within a factor of  $\sim 2$  of the self-consistent Langmuir-enhanced alternative, and the  $\omega^{8/3}$  exponent is unaffected. The wall-law baseline is conservative. It underestimates  $\varepsilon$  itself, and this dominates the Jensen overestimate, so our predictions represent a lower bound on the attenuation rate.

## G. Validity of Kolmogorov scaling at swell-selected eddy scales

The  $\omega^{8/3}$  scaling exponent requires Kolmogorov scaling  $E_u(q) \propto \varepsilon^{2/3} q^{-5/3}$  only at eddy wavenumbers  $q \sim k$ , where the dissipation kernel peaks. The spectral contribution density  $d\Gamma/d\ln q$  peaks near  $q/k \approx 1$ , where the eddy horizontal scale matches the orbital penetration depth and geometric overlap is maximised. The half-decade band  $0.5 \leq q/k \leq 2$  captures the majority of the total attenuation rate (58-66% depending on window shape). For swell wavelengths  $\lambda \approx 200$ -500 m, the selected eddy scales are  $\ell_h \approx 30$ -80 m. What must be justified is not a universal  $k^{-5/3}$  law for all mixed-layer motions at these scales, but the use of  $E_u(q) \propto \varepsilon^{2/3} q^{-5/3}$  over the narrow swell-selected band  $q \sim k$  that carries most of the Green-Kubo weight. For typical upper-ocean conditions ( $\varepsilon \sim 10^{-8}$ - $10^{-7} \text{ m}^2 \text{ s}^{-3}$ ,  $N \sim 10^{-3} \text{ s}^{-1}$ ), the Ozmidov wavenumber  $k_O = (N^3/\varepsilon)^{1/2} \approx 0.1$ - $0.3 \text{ rad m}^{-1}$ . The swell-selected wavenumbers  $q \sim k \approx (1$ - $3) \times 10^{-2} \text{ rad m}^{-1}$  fall below  $k_O$  by roughly one decade. However, the *horizontal* energy spectrum maintains an approximately continuous  $\varepsilon^{2/3} k_h^{-5/3}$  form across  $k_O$ , without evidence for an order-one break over the swell-selected band. The unified framework of Kunze [55] provides the theoretical basis. This spectral continuity is confirmed by towed ocean microstructure measurements [56], atmospheric data [57], and DNS of stratified turbulence [58, 59]. The orbital penetration depth  $1/k \approx 30$ -80 m is comparable to or smaller than the mixed-layer depth, so the interaction occurs predominantly within the surface mixed layer, where the buoyancy frequency is  $N_{\text{ml}} \sim 10^{-4} \text{ s}^{-1}$ . The local Ozmidov length scale is then  $L_O = (\varepsilon/N_{\text{ml}}^3)^{1/2} \approx 300 \text{ m}$ , exceeding the orbital penetration depth by a factor of 3-10. The swell-selected eddies therefore reside within the locally isotropic regime

where the standard Kolmogorov spectrum applies without appeal to the Kunze framework. The turbulent Reynolds number

$$\text{Re}_\ell \equiv \frac{\varepsilon^{1/3}}{\nu k^{4/3}} \quad (\text{S.149})$$

is of order  $10^6$  for 14-s swell, confirming a well-developed inertial subrange at the relevant scales [37]. Within the mixed layer, local isotropy is assured. Below it, the horizontal spectrum maintains the same  $\varepsilon^{2/3} k_h^{-5/3}$  form continuously across  $k_O$ .

## H. Assembly of the total prefactor

| Factor                    | Baseline                                | Physical range          | Source                |
|---------------------------|-----------------------------------------|-------------------------|-----------------------|
| Numerical coefficient     | 4                                       | -                       | deep-water dispersion |
| $C_K$                     | 1.5                                     | 1.5-1.7                 | experiments/DNS       |
| $\tilde{G}_{\text{geom}}$ | 2/3                                     | 2/3-3/4                 | Section A             |
| $C_S$                     | $\pi/6 \approx 0.52$                    | 0.31- $\pi/6$           | Section B             |
| $C_\tau$                  | 1                                       | 0.89-1.25               | Section C             |
| $C_E$                     | 1                                       | 1 (deep-water baseline) | Section D             |
| $C_{\text{tot}}$          | <b><math>2\pi/3 \approx 2.09</math></b> | <b>[1.10, 3.34]</b>     | Eq. (S.116)           |

The standard value  $C_K = 1.5$  [45] is adopted as the baseline. High-resolution DNS compilations report values up to 1.7 [60]. For circularly polarised deep-water waves with  $R_u \sim 1$ -2, the geometric factor is  $\tilde{G}_{\text{geom}} \in [2/3, 3/4]$ . The coupling constant ranges from  $C_S = \pi/6$  (surface-injected turbulence,  $\alpha = 2$ ) to 0.31 (strong surface concentration,  $\alpha = 5/2$ ). The  $\alpha = 3/2$  case ( $C_S = 1.40$ ) is retained in Section B as a theorem-level UV-convergence floor, not as the physical upper bound. For the far-field mixed layer the prefactor range is restricted to  $\alpha \in [2, 5/2]$ . Together with  $C_\tau \in [0.89, 1.25]$  and  $C_E = 1$ ,

$$C_{\text{tot}}^{(\text{phys})} \in [4 \times 1.5 \times \frac{2}{3} \times 0.31 \times 0.89, 4 \times 1.7 \times \frac{3}{4} \times \frac{\pi}{6} \times 1.25] \approx [1.10, 3.34]. \quad (\text{S.150})$$

The baseline value  $C_{\text{tot}} = 4 \times 1.5 \times (2/3) \times (\pi/6) \times 1 \times 1 = 2\pi/3 \approx 2.09$  sits near the geometric mean of this range. The wider uncertainty compared with the geometric and correlation factors ( $\tilde{G}_{\text{geom}}$  and  $C_\tau$  together contribute  $< 30\%$  variation) is dominated by the coupling constant  $C_S$ , which reflects the physical ambiguity in the UV exponent  $\alpha$ .

The distinction between the scaling exponent and the prefactor is central to the theory's predictive status. The  $\omega^{8/3}$  exponent follows from the power-counting  $-5/3 + 2 - 1 = -2/3$  and the deep-water dispersion relation alone. It is independent of the window shape  $\alpha$ , the turbulent correlator, the depth profile of  $\varepsilon$ , and any  $\mathcal{O}(1)$  prefactor. The prefactor  $C_{\text{tot}} \in [1.10, 3.34]$  is a controlled parametrisation of the remaining geometric and environmental uncertainties, not a free parameter. Each factor is independently constrained by turbulence measurements, wave kinematics, or analytical integration. The residual prefactor uncertainty is dwarfed by the order-of-magnitude environmental variability in  $\varepsilon_{\text{eff}}$  along real propagation paths (Section E).

## S6. Random-walk theory and intrinsic variance closure

Satellite retrievals resolve individual rays and return a finite-length attenuation estimator  $\hat{\mu}_i$ , rather than the local ensemble-mean rate  $\mu_E(\omega)$  that enters the Green-Kubo theory. The distinction matters.  $\mu_E$  is controlled only by the *integral* of the mode-projected force autocorrelation (equivalently the zero-frequency spectral density  $S_F(0)$ ), whereas the variance of  $\hat{\mu}_i$  depends on the *shape* of the autocorrelation through a long-run variance factor (Section B).

Because wave-eddy encounters act multiplicatively on the wave energy and are nearly symmetric ( $|\bar{\varepsilon}|/\sigma \sim \delta \ll 1$ , Section I),  $N \sim 10^5$  encounters accumulate along a trans-oceanic path,

producing a log-energy random walk. Under weak dependence (short-memory mixing), the central-limit statistics yield

$$\hat{\mu}_i \sim \mathcal{N}\left(2\mu_{E,i}, \frac{2\mu_{E,i}}{L_i} \mathcal{R}_i + \sigma_{\text{meas}}^2\right), \quad (\text{S.151})$$

where  $L_i$  is the propagation distance,  $\sigma_{\text{meas}}^2$  is an estimator-level additive variance accounting for observational methodology noise (not encounter-level stochastic forcing), and  $\mathcal{R}_i = 1$  recovers the near-independent-encounter baseline (with  $\mathcal{R}_i \neq 1$  capturing inter-encounter correlations). For homogeneous along-ray conditions the observable mean reduces to  $2\mu_{E,i}$ . In the data-facing formulation used in the main text and in Section A it is replaced by the path-averaged observable mean  $\mu_{\text{model},i}$ . The remainder of this section derives the factor of 2 in the mean, the intrinsic variance coefficient  $c_0$ , and its renormalisation by inter-encounter correlations.

### A. Random walk in logarithmic energy

Let  $E_k(x)$  denote the modal energy of the swell component with wavenumber  $k$  along a ray parametrised by distance  $x$ . The logarithmic spatial attenuation rate is defined as

$$\hat{\mu} = -\frac{1}{L} \ln \frac{E_k(L)}{E_k(0)}. \quad (\text{S.152})$$

The logarithmic definition retains exact additivity. Multiplicative energy changes along successive segments become additive increments in  $\ln E_k$ , making it the natural variable for a random-walk formulation. We partition the ray into  $N$  segments of length  $\ell_{\text{corr}}$ , the advective decorrelation length of the projected vorticity field along the ray ( $\ell_{\text{corr}} \sim \tau_c c_g$ , comparable to the force correlation length). This length serves as the baseline coarse-graining step. The observable ratio  $c_0$  is independent of this choice (see the coarse-graining remark below Eq. (S.167)). The distinct *integral correlation length*  $\ell_{\text{int}}$  of the increment process is introduced in Section B and governs the variance renormalisation when successive increments are not independent.

$$N = \frac{L}{\ell_{\text{corr}}}. \quad (\text{S.153})$$

For swell wavelengths of a few hundred metres and upper-ocean turbulence with integral scales of order tens of metres,  $N \sim 10^4$ - $10^5$  over a trans-oceanic path. Let

$$\Delta\varepsilon_n \equiv \ln \frac{E_n}{E_{n-1}} \quad (\text{S.154})$$

denote the logarithmic energy increment in the  $n$ th segment, so that

$$\hat{\mu} = -\frac{1}{L} \sum_{n=1}^N \Delta\varepsilon_n. \quad (\text{S.155})$$

To connect the random-walk increments to the microscopic force statistics, we introduce the *fractional energy change* per encounter,

$$\xi_n \equiv \frac{\Delta E_n}{E_{n-1}} = \frac{E_n - E_{n-1}}{E_{n-1}}, \quad (\text{S.156})$$

where  $\Delta E_n$  is the energy change accumulated in the  $n$ th segment. The log-energy increment is then

$$\Delta\varepsilon_n = \ln(1 + \xi_n) = \xi_n - \frac{1}{2}\xi_n^2 + \mathcal{O}(\xi_n^3). \quad (\text{S.157})$$

In the weak-coupling limit  $\delta \ll 1$ , each  $\xi_n$  is  $\mathcal{O}(\delta)$ , so the expansion is well controlled. We compute the mean and variance of  $\xi$  through complementary steps. The variance uses only bath

statistics (no FDR), while the mean requires FDR-II from Section S2. Both are then linked through the common integral  $I_F$ . During the  $n$ th encounter, the wave-energy trajectory traverses one spatial period of the dominant turbulent Fourier mode in the advective decorrelation time  $\tau_{\text{adv}} = \ell_{\text{corr}}/c_g$ . The modal energy  $E_k = \frac{1}{2}|a_k|^2$  (the same convention as Section S2) evolves under the GLE derived in Section S2 (Eq. (S.53)). In the weak-probe limit (A4,  $\delta \ll 1$ ), the mode amplitude varies negligibly during  $\tau_{\text{adv}}$ , and the instantaneous rate of energy change due to the mode-projected stochastic vortex force  $F_k$  is

$$\dot{W}_k(t) = \left. \frac{dE_k}{dt} \right|_{\text{SVF}} = \text{Re}[a_k^* F_k(t)]. \quad (\text{S.158})$$

Here  $F_k(t) = \int \psi_k^*(\mathbf{x}) \cdot \mathbf{f}_{\text{svf}}(\mathbf{x}, t) d^3x$  is the mode-projected force (Eq. (S.36)),  $\psi_k$  is the normalised mode function, and Eq. (S.158) follows from  $dE_k/dt = \text{Re}[a_k^* da_k/dt]$  restricted to the SVF contribution. The fractional energy change per encounter is then

$$\xi_n = \frac{1}{E_k} \int_0^{\tau_{\text{adv}}} \dot{W}_k(t) dt = \frac{1}{E_k} \int_0^{\tau_{\text{adv}}} \text{Re}[a_k^* F_k(t)] dt. \quad (\text{S.159})$$

We first compute the variance of  $\xi_n$  using only bath statistics (assumptions A3, A5-no FDR-II required). The variance is

$$\text{Var}(\xi) = \frac{1}{E_k^2} \int_0^{\tau_{\text{adv}}} \int_0^{\tau_{\text{adv}}} C_{\dot{W}}(t-t') dt dt', \quad (\text{S.160})$$

where  $C_{\dot{W}}(\tau) \equiv \langle \dot{W}_k(0) \dot{W}_k(\tau) \rangle$  is the autocorrelation of the energy transfer rate. We express  $C_{\dot{W}}$  in terms of the mode-projected force autocorrelation

$$C_F(\tau) \equiv \langle F_k(0) F_k^*(\tau) \rangle. \quad (\text{S.161})$$

From (S.158),

$$C_{\dot{W}}(\tau) = \langle \text{Re}[a_k^* F_k(0)] \text{Re}[a_k^* F_k(\tau)] \rangle. \quad (\text{S.162})$$

To evaluate this, we use the identity  $\text{Re}(z_1) \text{Re}(z_2) = \frac{1}{2} \text{Re}(z_1 z_2^*) + \frac{1}{2} \text{Re}(z_1 z_2)$  with  $z_1 = a_k^* F_k(0)$  and  $z_2 = a_k^* F_k(\tau)$ ,

$$z_1 z_2^* = |a_k|^2 F_k(0) F_k^*(\tau), \quad \langle z_1 z_2^* \rangle = 2E_k C_F(\tau), \quad (\text{S.163})$$

$$z_1 z_2 = (a_k^*)^2 F_k(0) F_k(\tau), \quad \langle z_1 z_2 \rangle = 0. \quad (\text{S.164})$$

The vanishing of the second average requires care because  $F_k$  itself is proportional to  $a_k$  (through the orbital velocity  $\mathbf{u}_\phi \propto a_k$  in the SVF). Writing  $F_k(t) = a_k \eta_k(t)$  where  $\eta_k$  depends only on the bath, one has  $z_1 z_2 = |a_k|^4 \eta_k(0) \eta_k(\tau)$ , and the question reduces to whether the pseudo-correlation  $\langle \eta_k(0) \eta_k(\tau) \rangle$  vanishes. It does, as a hard symmetry consequence of real-valuedness and translational invariance of a homogeneous bath field, not as an assumption about the wave phase. Specifically,  $\eta_k$  is the Fourier coefficient at wavevector  $\mathbf{k} \neq \mathbf{0}$  of a real, statistically homogeneous field along the ray. For an ideal plane-wave mode in a strictly homogeneous bath,  $\langle \hat{X}_{\mathbf{k}} \hat{X}_{\mathbf{k}'} \rangle \propto \delta(\mathbf{k} + \mathbf{k}')$  (pseudo-spectrum), whereas  $\langle \hat{X}_{\mathbf{k}} \hat{X}_{\mathbf{k}'}^* \rangle \propto \delta(\mathbf{k} - \mathbf{k}')$  (Hermitian spectrum). Setting  $\mathbf{k}' = \mathbf{k} \neq \mathbf{0}$  yields  $\delta(2\mathbf{k}) = 0$  and hence  $\langle \eta_k(0) \eta_k(\tau) \rangle = 0$ . For a finite-bandwidth wave packet, the pseudo-correlation is not identically zero but is suppressed by the spectral bandwidth ratio  $\Delta k/k \ll 1$  (narrow-band assumption A1). It therefore contributes only at higher order in the weak-coupling expansion. The complex process  $\eta_k$  is therefore *proper* (circularly symmetric) to leading order, and the pseudo-correlation is negligible as a consequence of translational invariance and narrow bandwidth-not as an assumption about the wave phase.<sup>3</sup> Substituting (S.163)-(S.164)

<sup>3</sup>In the ideal plane-wave limit, the pseudo-spectral density  $S_{\eta\eta}(\omega) = \int \langle \eta_k(0) \eta_k(\tau) \rangle e^{i\omega\tau} d\tau$  vanishes identically for  $k \neq 0$ , which is the standard properness condition for complex Fourier modes of a real homogeneous field. For finite bandwidth, the residual scales as  $\mathcal{O}(\Delta k/k)$  and is therefore negligible at leading order in the joint narrow-band ( $\Delta k/k \ll 1$ ) and weak-coupling ( $\delta \ll 1$ ) approximation adopted throughout.

into (S.162),

$$\boxed{C_{\dot{W}}(\tau) = E_k \operatorname{Re} C_F(\tau)}. \quad (\text{S.165})$$

This is the key bridge equation.  $\dot{W}_k = \operatorname{Re}[a_k^* F_k]$  is bilinear in the mode amplitude and the bath force. The properness identity contributes  $|a_k|^2 = 2E_k$  from  $\langle z_1 z_2^* \rangle$ , while the factor  $\frac{1}{2}$  from  $\operatorname{Re}(z_1)\operatorname{Re}(z_2) = \frac{1}{2}\operatorname{Re}(z_1 z_2^*) + \dots$  gives the net coefficient  $E_k$ . Inserting (S.165) into (S.160) and applying the Green-Kubo long-time approximation (see the coarse-graining remark below),

$$\begin{aligned} \operatorname{Var}(\xi) &= \frac{1}{E_k^2} 2\tau_{\text{adv}} \int_0^\infty C_{\dot{W}}(\tau) d\tau \\ &= \frac{1}{E_k^2} 2\tau_{\text{adv}} E_k \underbrace{\int_0^\infty \operatorname{Re} C_F(\tau) d\tau}_{\equiv I_F} \\ &= \frac{2\tau_{\text{adv}} I_F}{E_k}. \end{aligned} \quad (\text{S.166})$$

Writing  $\operatorname{Var}(\xi) = \beta_\xi \delta^2$ ,

$$\beta_\xi = \frac{2\tau_{\text{adv}} I_F}{E_k \delta^2}. \quad (\text{S.167})$$

*Independence of the coarse-graining scale.* The identification of one step with  $\ell_{\text{corr}}$  is a coarse-graining convenience. More generally, define a mesoscale step of length  $L_0 \gg c_g \tau_c$ , with duration  $\Delta t = L_0/c_g \gg \tau_c$ . Both the mean and variance of the cumulative increment scale linearly with  $\Delta t$ , so in the observable ratio  $c_0 = \sigma_{\delta\mu}^2 L / \langle \hat{\mu} \rangle$  the arbitrary length  $L_0$  cancels identically. Hence  $c_0 = D/\Gamma$  is a property of the force-autocorrelation shape, not of the chosen step size. We may set  $L_0 = \ell_{\text{corr}}$  without affecting the result.

So far, only stationarity (A3 (i)), factorisation (A5), and rapid decorrelation (A6) have been used. The mean of  $\xi$  requires FDR-II (Eq. (S.39)) and the Markov limit (Section S2 G). The ensemble-mean energy evolution in the Markov limit is (Eq. (S.68)),

$$\frac{d}{dt} \langle E_k \rangle = -2\Gamma(k) \langle E_k \rangle, \quad (\text{S.168})$$

where the Green-Kubo damping coefficient is (Eq. (S.58)),

$$\Gamma(k) = \int_0^\infty \operatorname{Re} K_k(\tau) d\tau = \frac{1}{2E_k} \int_0^\infty \operatorname{Re} C_F(\tau) d\tau = \frac{I_F}{2E_k}. \quad (\text{S.169})$$

Equation (S.169) gives the important relation

$$I_F = 2E_k \Gamma. \quad (\text{S.170})$$

Over one encounter of duration  $\tau_{\text{adv}}$ , the mean energy change is

$$\langle \Delta E \rangle = -2\Gamma E_k \tau_{\text{adv}} + \mathcal{O}(\delta^3 / \sqrt{N_{\text{mode}}}) + \mathcal{O}(\delta^4), \quad (\text{S.171})$$

so that

$$\langle \xi \rangle = \frac{\langle \Delta E \rangle}{E_k} = -2\Gamma \tau_{\text{adv}}. \quad (\text{S.172})$$

Writing  $\langle \xi \rangle = -\alpha \delta^2$ ,

$$\alpha = \frac{2\Gamma \tau_{\text{adv}}}{\delta^2}. \quad (\text{S.173})$$

Combining the two results and using (S.170) to eliminate  $I_F$  from (S.167),

$$\beta_\xi = \frac{2\tau_{\text{adv}}}{E_k \delta^2} \cdot 2E_k \Gamma = \frac{4\Gamma \tau_{\text{adv}}}{\delta^2}. \quad (\text{S.174})$$

Comparing with (S.173),

$$\boxed{\frac{\alpha}{\beta_\xi} = \frac{2\Gamma\tau_{\text{adv}}/\delta^2}{4\Gamma\tau_{\text{adv}}/\delta^2} = \frac{1}{2}}. \quad (\text{S.175})$$

This ratio is fixed entirely by FDR-II and the multiplicative coupling structure. It is independent of  $\delta$ ,  $\ell_{\text{corr}}$ , the specific form of  $C_F(\tau)$ , and the wave energy  $E_k$ . The factor  $1/2$  can be traced as follows. FDR-II gives  $\Gamma = I_F/(2E_k)$  (Eq. S.169), so the mean obeys  $|\langle\xi\rangle| = 2\Gamma\tau_{\text{adv}}$ . The power autocorrelation  $C_{\dot{W}} = E_k \text{Re} C_F$  (Eq. S.165) carries a factor of  $E_k$ . Substituting  $I_F = 2E_k\Gamma$  into the variance gives  $\text{Var}(\xi) = 2\tau_{\text{adv}}I_F/E_k = 4\Gamma\tau_{\text{adv}}$ . Hence  $\alpha \propto 2\Gamma$  and  $\beta_\xi \propto 4\Gamma$ , giving  $\alpha = \beta_\xi/2$ : FDR-II links the mean and variance of the encounter-level fractional loss through the same force autocorrelation.

With the  $\xi$ -level statistics in hand, we pass to the log-energy increment  $\Delta\varepsilon = \ln(1 + \xi)$  using the expansion (S.157). To leading order in  $\delta$ ,

$$\begin{aligned} \langle\Delta\varepsilon\rangle &= \langle\xi\rangle - \frac{1}{2}\langle\xi^2\rangle + \mathcal{O}(\delta^3/\sqrt{N_{\text{mode}}}) + \mathcal{O}(\delta^4) \\ &= -\alpha\delta^2 - \frac{1}{2}\beta_\xi\delta^2 + \mathcal{O}(\delta^3/\sqrt{N_{\text{mode}}}) + \mathcal{O}(\delta^4), \end{aligned} \quad (\text{S.176})$$

where we used  $\langle\xi^2\rangle = \text{Var}(\xi) + \langle\xi\rangle^2 = \beta_\xi\delta^2 + \mathcal{O}(\delta^4)$ . The variance is

$$\text{Var}(\Delta\varepsilon) = \text{Var}(\xi) + \mathcal{O}(\delta^3/\sqrt{N_{\text{mode}}}) + \mathcal{O}(\delta^4) = \beta_\xi\delta^2 + \mathcal{O}(\delta^3/\sqrt{N_{\text{mode}}}) + \mathcal{O}(\delta^4). \quad (\text{S.177})$$

The remainder is small because  $\xi$  is the sum of contributions from  $\mathcal{O}(N_{\text{mode}}) \gg 1$  weakly dependent turbulent Fourier components of the mode-projected force. Under A6 (finite memory) this sum is asymptotically Gaussian by the central limit theorem. In particular the third cumulant  $\kappa_3(\xi) = \mathcal{O}(\delta^3/\sqrt{N_{\text{mode}}})$  is negligible and the leading cross-covariance  $\text{Cov}(\xi, \xi^2)$  is parametrically suppressed, so non-Gaussian corrections are smaller than the retained  $\mathcal{O}(\delta^2)$  terms. Writing  $\langle\Delta\varepsilon\rangle = -A\delta^2$  and  $\text{Var}(\Delta\varepsilon) = B\delta^2$ , we identify,

$$A = \alpha + \frac{1}{2}\beta_\xi, \quad B = \beta_\xi. \quad (\text{S.178})$$

The coefficient  $A$  receives two contributions:  $\alpha$ , the *physical drift* through the FDR-II linear-response mechanism, and  $\frac{1}{2}\beta_\xi$ , the *Itô correction*-the geometric effect of noise in multiplicative dynamics, analogous to the  $-\frac{1}{2}\sigma^2$  correction in geometric Brownian motion. The ratio of the physical drift to the Itô correction is  $\alpha/(\beta_\xi/2) = 1$ . Half of the total log-energy decay comes from the noise-induced correction and half from the physical damping. The pathwise estimator (S.155) has mean

$$\langle\hat{\mu}(\omega)\rangle = \frac{A\delta^2}{\ell_{\text{corr}}} \quad (\text{S.179})$$

and variance

$$\text{Var}(\hat{\mu}) = \frac{B\delta^2}{L\ell_{\text{corr}}} + \mathcal{O}(\delta^4). \quad (\text{S.180})$$

Because the coarse-graining scale is chosen as  $\ell_{\text{corr}} \sim \tau_c c_g$  (comparable to the force correlation length), the coefficients  $A$  and  $B$  each absorb an  $\mathcal{O}(1)$  shape-dependent factor from the Green-Kubo integral replacement (see the coarse-graining remark above). These shape factors cancel identically in any ratio of  $B$  to  $A$ , so the predictions that follow ( $c_0 = B/A$ , the signal-to-noise ratio, and the negative-attenuation probability) are all independent of this approximation. Dividing (S.180) by (S.179) eliminates both  $\delta$  and  $\ell_{\text{corr}}$ ,

$$\text{Var}(\hat{\mu}) = \frac{B}{A} \frac{\langle\hat{\mu}(\omega)\rangle}{L} + \mathcal{O}(\delta^2). \quad (\text{S.181})$$

Defining  $c_0 \equiv B/A$ ,

$$\boxed{\text{Var}(\hat{\mu}) = c_0 \frac{\langle\hat{\mu}(\omega)\rangle}{L}, \quad c_0 = \frac{B}{A} = \frac{\beta_\xi}{\alpha + \frac{1}{2}\beta_\xi} + \mathcal{O}(\delta^2)}. \quad (\text{S.182})$$

The same microscopic force autocorrelation that fixes the ensemble-mean attenuation  $\mu_E(\omega)$  also determines the pathwise variance. No new degrees of freedom enter at the level of scatter. The cancellation of  $\ell_{\text{corr}}$  between numerator and denominator in (S.181) is structurally significant. The ratio  $\text{Var}(\hat{\mu})/\langle\hat{\mu}\rangle$  does not depend on the poorly constrained spatial correlation scale of the vorticity field. Both the mean and the variance per unit length scale as  $\ell_{\text{corr}}^{-1}$ . Their ratio depends only on  $c_0$  and the propagation distance  $L$ . Substituting  $\alpha = \beta_\xi/2$  (Eq. S.175) into (S.178),

$$A = \frac{\beta_\xi}{2} + \frac{\beta_\xi}{2} = \beta_\xi, \quad B = \beta_\xi, \quad (\text{S.183})$$

so that

$$c_0 = \frac{B}{A} = \frac{\beta_\xi}{\beta_\xi} = 1 + \mathcal{O}(\delta^2). \quad (\text{S.184})$$

The logical chain is. The variance of  $\xi$  uses only bath statistics (A3, A5, A6) and gives  $\text{Var}(\xi) = 2\tau_{\text{adv}}I_F/E_k$ , the mean uses FDR-II and gives  $|\langle\xi\rangle| = 2\Gamma\tau_{\text{adv}}$ , FDR-II bridges the two via  $I_F = 2E_k\Gamma$ , fixing  $\alpha = \beta_\xi/2$ . The Itô correction from passing to  $\Delta\varepsilon = \ln(1 + \xi)$  yields  $A = \beta_\xi$ , hence  $c_0 = B/A = 1$ . This result requires no specific parametric form for  $C_F(\tau)$ . It follows from FDR-II and the multiplicative coupling structure alone. Because  $F_k$  is bilinear in  $a_k$  (via  $\mathbf{u}_\varphi \propto a_k$ ), the force autocorrelation factorises as  $C_F(\tau) = 2E_k G_k(\tau)$  (Eq. (S.44)), where  $G_k$  depends only on the bath statistics. Hence  $c_0 = 1$  is independent of wave amplitude.

The coefficients 2 (mean), 2 (variance), and 1 (their ratio) are analytic results at leading nontrivial order in the weak-coupling expansion  $\delta = u'/c_g \ll 1$ . They are not empirical fits, not large- $L$  approximations, and not assumptions. They follow from FDR-II, the bilinear coupling structure, and the Ito correction, with corrections entering at  $\mathcal{O}(\delta^2) \sim 10^{-6}$ - $10^{-4}$ . The fixed-design Monte Carlo simulations of Section D provide a numerical consistency check of this leading-order prediction.

The baseline  $c_0 = 1$  applies to the finite-length log-endpoint estimator  $\hat{\mu} = -[\ln E(L) - \ln E(0)]/L$ . Satellite retrievals typically fit an OLS regression slope through  $M$  distance- $H_s$  measurements along the track. For a Brownian log-energy process observed at  $M$  equally spaced points over length  $L$ , the intrinsic variance of the OLS slope is

$$\text{Var}(\hat{\mu}_{\text{OLS}} \mid \text{intrinsic}) = f(M) \frac{2\mu_E}{L}, \quad f(M) = \frac{6}{5} \frac{M^2 + 1}{M(M + 1)}, \quad (\text{S.185})$$

with  $f(2) = f(3) = 1$  and  $f(M) \rightarrow 6/5$  as  $M \rightarrow \infty$ . The inflation in the dense-sampling limit arises because intermediate points of a random walk add correlated noise without proportionate signal gain. The relevant  $M$  is the number of *effectively independent distance measurements* along the regression, not the total number of along-track  $H_s$  samples. In the Jiang et al. altimeter method [34, 61], each satellite overpass contributes one effective distance point (possibly averaged from several 7 km along-track samples), and a typical event is tracked over  $M \sim 3$ -6 overpasses, giving  $f(M) \approx 1.00$ - $1.06$ . The Stopa et al. SAR analysis [19] requires at least 15 imagettes from 5 satellite passes per track, giving effective  $M \sim 5$ -15 and  $f(M) \approx 1.04$ - $1.13$ . In the present 241-track dataset,  $n_{\text{points}}$  ranges from 13 to 609 (median 117), but these are densely sampled along-track  $H_s$  values from  $\sim 3$ -5 independent overpasses, so the effective  $M$  for the regression is of the same order as in the Jiang sample. At these low effective  $M$  values  $f(M)$  lies between 1.00 and 1.13, corresponding to at most a 13% variance inflation over the endpoint baseline. This correction is an order of magnitude smaller than the width of the  $c_{0,\text{MLE}}$  95% confidence interval (0.60) and is absorbed into the empirical  $c_0$ . The measurement-noise contribution to the regression variance scales as  $\sigma_{\ln E}^2/S_{xx}$  and decreases with increasing  $M$ , remaining subdominant for  $M \gtrsim 5$  (Section C).

## B. Variance renormalisation from inter-encounter correlations

The baseline prediction  $c_0 = 1$  (Eq. S.184) was obtained under the idealisation that the log-energy increments  $\{\Delta\varepsilon_n\}$  over successive decorrelation segments are independent and identically distributed. Here we relax this assumption and quantify how weak dependence along the ray modifies the intrinsic estimator variance while leaving the ensemble-mean drift unchanged. It is essential to distinguish two objects.

(i) The *ensemble-mean* damping rate  $\Gamma(k)$  (and the corresponding spatial attenuation rate  $\mu_E = 2\Gamma/c_g$ ) is defined by the Green-Kubo relation

$$\Gamma(k) = \frac{1}{2E_k} \int_0^\infty \text{Re} \langle F_k(0) F_k^*(t) \rangle dt = \frac{S_F(0)}{4E_k} \geq 0, \quad (\text{S.186})$$

where  $F_k(t)$  is the mode-projected stochastic vortex force and  $S_F$  is its power spectral density. Equation (S.186) depends only on the *integral* of the force autocorrelation (equivalently the zero-frequency spectral weight  $S_F(0)$ ) and thus already incorporates the full temporal/spatial correlation structure of the turbulent bath. No discretisation into “encounters” is required to define  $\Gamma$ .

(ii) The *pathwise* satellite estimator  $\hat{\mu}$  is a finite-length average of a fluctuating quantity and therefore has a nontrivial variance. The variance depends not only on the integral of an autocorrelation function but also on its *shape* through a long-run variance (integrated correlation length/time). This is where inter-encounter dependence enters. Let  $L$  denote the effective propagation distance and write the log-energy change as

$$\Delta\varepsilon(L) \equiv \ln E(L) - \ln E(0) = \int_0^L \dot{\varepsilon}(s) ds, \quad \hat{\mu} \equiv -\frac{\Delta\varepsilon(L)}{L}, \quad (\text{S.187})$$

where  $\dot{\varepsilon}(s) = d \ln E / ds$  is the instantaneous log-energy decay rate along the ray. For a stationary, short-memory process  $\dot{\varepsilon}$  with autocovariance  $C_{\dot{\varepsilon}}(r) = \text{Cov}(\dot{\varepsilon}(s), \dot{\varepsilon}(s+r))$ , the variance of  $\hat{\mu}$  admits the exact representation

$$\text{Var}(\hat{\mu}) = \frac{1}{L^2} \int_0^L \int_0^L C_{\dot{\varepsilon}}(s-s') ds ds'. \quad (\text{S.188})$$

If  $L$  is large compared with the correlation length of  $C_{\dot{\varepsilon}}$ , the standard long-run variance reduction gives

$$\text{Var}(\hat{\mu}) \simeq \frac{1}{L} \int_{-\infty}^{\infty} C_{\dot{\varepsilon}}(r) dr. \quad (\text{S.189})$$

Equation (S.189) is the continuous analogue of the central-limit scaling for weakly dependent sequences. To connect with the encounter-level derivation of Eq. (S.184), partition the ray into segments of length  $\ell_{\text{corr}}$  (the advective decorrelation length) and define

$$\Delta\varepsilon_n \equiv \int_{(n-1)\ell_{\text{corr}}}^{n\ell_{\text{corr}}} \dot{\varepsilon}(s) ds, \quad N \equiv L/\ell_{\text{corr}}. \quad (\text{S.190})$$

Then  $\Delta\varepsilon(L) = \sum_{n=1}^N \Delta\varepsilon_n$  and

$$\text{Var}(\hat{\mu}) = \frac{1}{L^2} \text{Var}\left(\sum_{n=1}^N \Delta\varepsilon_n\right). \quad (\text{S.191})$$

Let

$$\rho_m \equiv \frac{\text{Cov}(\Delta\varepsilon_n, \Delta\varepsilon_{n+m})}{\text{Var}(\Delta\varepsilon_n)}, \quad m \geq 1, \quad (\text{S.192})$$

and assume short-memory mixing  $\sum_{m \geq 1} |\rho_m| < \infty$  so that the long-run variance exists. A standard calculation yields

$$\text{Var}(\hat{\mu}) = \frac{\text{Var}(\Delta\varepsilon_n)}{L \ell_{\text{corr}}} \left(1 + 2 \sum_{m=1}^{\infty} \rho_m\right) \equiv \frac{\text{Var}(\Delta\varepsilon_n)}{L \ell_{\text{corr}}} \mathcal{R}, \quad (\text{S.193})$$

where

$$\mathcal{R} \equiv 1 + 2 \sum_{m=1}^{\infty} \rho_m \quad (\text{S.194})$$

is the discrete long-run variance renormalisation factor. In the near-independent-encounter limit,  $\rho_m = 0$  for  $m \geq 1$  and  $\mathcal{R} = 1$ . In the leading-order FDR-II/Ito framework (Section S6, Methods),

$$\langle \hat{\mu} \rangle = 2\mu_E, \quad \text{Var}(\hat{\mu}) = \frac{2\mu_E}{L} \quad (\text{near-independent encounters}), \quad (\text{S.195})$$

so that the intrinsic noise-to-signal coefficient is  $c_0 = \sigma_{\hat{\mu}}^2 / (\langle \hat{\mu} \rangle / L) = 1$ . With weak dependence the mean remains unchanged (linearity of expectation), but the variance is multiplied by  $\mathcal{R}$ ,

$$\text{Var}(\hat{\mu}) = \frac{2\mu_E}{L} \mathcal{R}, \quad \boxed{c_0 = \mathcal{R}}. \quad (\text{S.196})$$

Thus correlations renormalise the *second moment* only. The first-moment prediction  $\mu_E$  is unaffected because it is fixed by the Green-Kubo coefficient  $\Gamma$  in Eq. (S.186).

A simple closure expresses  $\mathcal{R}$  in terms of an integral correlation length along the ray. Inter-encounter dependence of the increments  $\Delta\varepsilon_n$  is inherited from the spatial organisation of the mode-projected SVF along the trajectory. Because  $\varepsilon$  is bilinear in the swell mode and the mode-projected force, its covariance generally involves fourth-order bath statistics. Under a Gaussian or quasi-Gaussian closure for the turbulent field (consistent with the leading-order Green-Kubo framework, Sections S2-S4), the increment correlations can be parametrised by a normalised spatial correlation function  $R(r)$  of an appropriate projected bath field along the ray, giving the approximation  $\rho_m \approx R(m\ell_{\text{corr}})$  for  $m \geq 1$ .

Using  $R(-r) = R(r)$  and  $\rho_0 \equiv 1$ , we may rewrite  $\mathcal{R} \simeq \sum_{m=-\infty}^{\infty} R(m\ell_{\text{corr}})$  and approximate the sum by a Riemann integral,

$$\mathcal{R} \simeq \frac{1}{\ell_{\text{corr}}} \int_{-\infty}^{\infty} R(r) dr \equiv \frac{\ell_{\text{int}}}{\ell_{\text{corr}}}, \quad (\text{S.197})$$

where

$$\ell_{\text{int}} \equiv \int_{-\infty}^{\infty} R(r) dr \quad (\text{S.198})$$

is the integral correlation length along the ray. Hence

$$\boxed{c_0 = \frac{\ell_{\text{int}}}{\ell_{\text{corr}}}}. \quad (\text{S.199})$$

This closure makes explicit that the remaining uncertainty in  $c_0$  is controlled by an integrated correlation length, i.e. by the *shape* of the relevant correlation function, not by its value at zero lag. The sign and magnitude of the correction are controlled by the ratio  $\mathcal{R} = \ell_{\text{int}}/\ell_{\text{corr}}$ :

(i)  $\mathcal{R} = 1$  ( $c_0 = 1$ ):  $R(r)$  decays rapidly and the chosen coarse-graining scale  $\ell_{\text{corr}}$  matches the integral scale. Successive encounters are effectively independent.

(ii)  $\mathcal{R} > 1$  ( $c_0 > 1$ ):  $R(r)$  has a slowly decaying positive tail, so  $\ell_{\text{int}} > \ell_{\text{corr}}$ . Physically, this occurs when the ray remains within a coherent large-scale structure for many consecutive segments, producing positively correlated increments. Large-scale intermittency of the dissipation rate can act similarly.

(iii)  $\mathcal{R} < 1$  ( $c_0 < 1$ ):  $R(r)$  crosses zero and develops a negative lobe, reducing  $\ell_{\text{int}}$  by cancellation. Along a one-dimensional transect through a vorticity-dominated field, rapid sign alternation can produce such negative lobes even when the velocity field itself remains positively correlated.

The integral scale  $\ell_{\text{int}}$  is controlled primarily by the low-wavenumber rollover and by any sign changes of  $R(r)$ , rather than by inertial-range power laws alone. In particular, for the relevant

stationary along-ray process with one-dimensional spectrum  $\Phi(q)$ ,  $\ell_{\text{int}}$  is proportional to  $\Phi(0^+)$  via the Wiener-Khinchin theorem. Hence the value of  $\ell_{\text{int}}$  is set by the energy-injection range and by cancellation in  $R(r)$ , not by the inertial-subrange exponent. Our inferred negative-rate fractions are consistent with  $c_0 = \mathcal{O}(1)$  and in fact suggest  $c_0 \lesssim 1$ , i.e. a modest variance reduction relative to the near-independent-encounter baseline.

All distribution-level predictions can be written in terms of  $c_0$ : the signal-to-noise ratio  $\mathcal{S} = \sqrt{\langle \hat{\mu} \rangle L} / c_0$ , the negative-rate fraction  $P(\hat{\mu} < 0) = \Phi(-\mathcal{S})$ , and the deterministic emergence scale  $L_{\text{det}} = c_0 / \langle \hat{\mu} \rangle$ . The FDR-II baseline  $c_0 = 1$  provides a reference value. The factor  $\mathcal{R}$  parametrises the remaining uncertainty associated with spatial organisation and weak dependence along the ray. Direct measurement of  $\mathcal{R}$  (equivalently  $\ell_{\text{int}}$ ) from wave-resolving DNS or high-resolution ocean simulations would close this last degree of freedom and yield a fully *a priori* prediction of the intrinsic estimator variance.

At the adopted observational lower bound  $\sigma_{\text{meas}} = 0.63 \times 10^{-7} \text{ m}^{-1}$ , the two-parameter likelihood analysis (Extended Data Fig. 7) yields  $c_{0,\text{MLE}} = 0.78$  with a 95% confidence interval [0.56, 1.16], corresponding to

$$\mathcal{R} = c_0 \approx 0.78, \quad \mathcal{R} \in [0.56, 1.16] \text{ (95\% CI)}. \quad (\text{S.200})$$

This value is conditional on the assumed  $\sigma_{\text{meas}}$ . Because  $c_0$  and  $\sigma_{\text{meas}}$  are partially degenerate in the likelihood—they trade off along a ridge that preserves the total predictive variance (Extended Data Fig. 8a in the main text)—a joint profile over both parameters at  $\beta = 1$  yields a data-driven  $\sigma_{\text{meas}} \approx 1.2 \times 10^{-7} \text{ m}^{-1}$  with  $c_0$  near zero. The adopted  $\sigma_{\text{meas}} = 0.63 \times 10^{-7} \text{ m}^{-1}$  is a lower bound reflecting observational errors alone. The excess in the data-driven estimate is attributable to residual  $\varepsilon_{\text{eff}}$  prediction error. The reported  $c_{0,\text{MLE}} = 0.78$  should therefore be interpreted, within the adopted additive variance decomposition and the lower-bound choice of  $\sigma_{\text{meas}}$ , as a conditional upper bound on the true intrinsic variance coefficient, since it absorbs whatever non-intrinsic scatter is not captured by  $\sigma_{\text{meas}}$ . The first-moment prediction  $\beta = 1$  is unaffected: it lies within the 95% CI regardless of how the variance budget is partitioned (Extended Data Fig. 8b,c).

If the true intrinsic  $c_0$  does lie below 1, a physical mechanism is needed. Along-ray encounter correlations provide one. The renormalisation  $c_0 = \mathcal{R}$  with  $\mathcal{R} < 1$  (by construction  $\mathcal{R} \geq 0$ , since it is a long-run variance ratio) does not require anomalous variance suppression. It only implies that the along-ray correlation function is not a purely monotonic positive kernel, so that partial cancellation in the correlation integral reduces  $\ell_{\text{int}}$  below  $\ell_{\text{corr}}$ . This is plausible in the wave-driven upper ocean, where Langmuir turbulence can organise into counter-rotating vortical structures [10]. Depending on ray orientation, along-ray transects may then exhibit alternating-sign contributions and partial cancellation in the correlation integral. Large-eddy simulations show irregular cell patterns with finite spatial and temporal correlation scales rather than a single universal correlation shape [62]. Reviews of upper-ocean turbulence likewise emphasise that surface-wave effects drive substantial departures from the classical shear-only picture of boundary-layer mixing [22, 63].

A simple illustration is provided by an oscillatory correlation model, for example  $R(r) \propto e^{-|r|/\ell_c} \cos(\kappa r)$ , whose negative side-lobes reduce the correlation integral and can therefore produce  $\mathcal{R} < 1$ . At the conditional value  $c_0 \approx 0.78$ , only a modest oscillatory component is required; stronger cancellation would yield smaller  $\mathcal{R}$ , but the qualitative picture is unchanged.

### C. Signal-to-noise ratio and deterministic emergence scale

The Green-Kubo theory determines the *ensemble-mean* energy decay rate  $\mu_E$  through  $d\langle E \rangle / dx = -2\mu_E \langle E \rangle$ . Satellite altimeters, however, do not observe  $\mu_E$  directly. They return a finite-length *log-endpoint* attenuation estimator

$$\hat{\mu} \equiv -\frac{1}{L} \ln \frac{E(L)}{E(0)}, \quad (\text{S.201})$$

whose mean differs from  $\mu_E$  by the leading-order Itô correction. In the weak-coupling Markov limit (Section A),

$$\langle \hat{\mu} \rangle = 2\mu_E, \quad \text{Var}(\hat{\mu}) = \frac{2\mu_E}{L} c_0 \quad (c_0 = 1 \text{ for near-independent encounters}), \quad (\text{S.202})$$

so that the *detectability* of single-track decay is naturally quantified at the estimator level by the signal-to-noise ratio

$$\mathcal{S} \equiv \frac{\langle \hat{\mu} \rangle}{\sqrt{\text{Var}(\hat{\mu})}} = \sqrt{\frac{\langle \hat{\mu} \rangle L}{c_0}} = \frac{2\mu_E}{\sqrt{2\mu_E/L}} = \sqrt{2\mu_E L}. \quad (\text{S.203})$$

The appearance of  $2\mu_E$  is therefore not a redefinition of the physical damping rate. It reflects the mapping from the underlying energy-space drift  $\mu_E$  to the observed log-endpoint estimator  $\hat{\mu}$  under multiplicative noise.

Setting  $\mathcal{S} = 1$  defines the *deterministic emergence scale*  $L_{\text{det}}$  at which the cumulative regression signal becomes comparable to the cumulative intrinsic scatter,

$$L_{\text{det}} = \frac{c_0}{\langle \hat{\mu} \rangle} = \frac{c_0}{2\mu_E} \xrightarrow{c_0=1} \frac{1}{2\mu_E}. \quad (\text{S.204})$$

Thus  $L_{\text{det}}$  is an estimator-level detectability threshold. It should not be conflated with the ensemble-mean energy  $e$ -folding distance  $\mu_E^{-1}$ . For  $c_0 = 1$ ,  $L_{\text{det}}$  is half the energy  $e$ -folding distance because  $\hat{\mu}$  is defined in log-energy and inherits the Itô drift. From the encounter-level scalings of Section I,  $|\bar{\epsilon}| \sim E\delta^2$  and  $\sigma \sim E\delta$ , so  $\mathcal{S} = 1$  requires  $N^* = c_0\delta^{-2}$  encounters and hence  $L_{\text{det}} = c_0 \ell_{\text{corr}} \delta^{-2}$ . Using  $\langle \hat{\mu} \rangle \sim \delta^2/\ell_{\text{corr}}$  (Eq. S.179) recovers identically

$$L_{\text{det}} = \frac{c_0 \ell_{\text{corr}}}{\delta^2} = \frac{c_0}{\langle \hat{\mu} \rangle}. \quad (\text{S.205})$$

For deep-water swell of period  $T = 15$  s:  $k \approx 0.018$  rad m $^{-1}$ ,  $\ell_{\text{corr}} \sim 1/k \approx 60$  m. A trans-oceanic ray of length  $L \sim 10^4$  km traverses

$$N \approx \frac{10^7 \text{ m}}{60 \text{ m}} \approx 1.7 \times 10^5 \quad (\text{S.206})$$

near-independent encounters. Inserting  $\bar{\mu}_{\text{obs}} = 0.8 \times 10^{-7} \text{ m}^{-1}$  (corresponding to  $\mu_E \approx 0.40 \times 10^{-7} \text{ m}^{-1}$ ) and  $c_0 = 1$ ,

$$L_{\text{det}} = \frac{c_0}{\bar{\mu}_{\text{obs}}} \sim \frac{1}{0.8 \times 10^{-7}} \approx 1.25 \times 10^7 \text{ m} = 12,500 \text{ km}, \quad (\text{S.207})$$

and the signal-to-noise ratio for a 10 000 km path is

$$\mathcal{S} = \sqrt{\frac{\bar{\mu}_{\text{obs}} L}{c_0}} \approx \sqrt{\frac{0.8 \times 10^{-7} \times 10^7}{1}} \approx 0.89. \quad (\text{S.208})$$

This places typical trans-oceanic swell in the marginal-detection regime ( $\mathcal{S} \lesssim 1$ ). The predicted negative-estimate fraction is

$$P(\hat{\mu}_i < 0) = \Phi(-\mathcal{S}) \approx \Phi(-0.89) \approx 19\%, \quad (\text{S.209})$$

consistent with the observed ranges of 24% [34] and 13% [19]. Because the scaling law links  $\mu_E$  to independently measurable environmental quantities, the SNR can be written explicitly as

$$\mathcal{S}(\varepsilon_{\text{eff}}, \omega, L) = \sqrt{2C_{\text{tot}} \varepsilon_{\text{eff}}^{2/3} g^{-7/3} \omega^{8/3} L}, \quad (\text{S.210})$$

making transparent three routes to higher detectability, stronger turbulence, shorter-period swell, and longer paths, each explored in Extended Data Fig. 5. Note that  $\mathcal{S}$  here is the intrinsic SNR under spatially uniform  $\varepsilon_{\text{eff}}$ . Environmental variability along individual tracks inflates the effective variance, so the realised  $\mathcal{S}_{\text{obs}} \leq \mathcal{S}$  and  $P_{\text{obs}}(\hat{\mu} < 0) \geq \Phi(-\mathcal{S})$ . Over the far-field wind range  $u_{10} \approx 3\text{--}8 \text{ m s}^{-1}$  ( $\varepsilon_{\text{eff}} \sim 10^{-8}\text{--}10^{-6} \text{ m}^2 \text{ s}^{-3}$ ), the 15 s swell SNR rises from  $\mathcal{S} \approx 0.4$  to  $\approx 1.2$  and the intrinsic negative-estimate fraction decreases from  $\sim 34\%$  to  $\sim 11\%$ . Both the Jiang and Stopa datasets fall on or below the theoretical curves, consistent with additional scatter from along-path environmental variability. At fixed turbulence and path length, the  $\omega^{8/3}$  dependence gives  $\mathcal{S} \propto \omega^{4/3}$ , so 12 s swell has roughly double the SNR of 18 s swell. The small parameter  $\delta = u'/c_g$  spans  $10^{-3}\text{--}10^{-2}$  across the swell band (Extended Data Fig. 5c). The  $\mathcal{S} \sim \mathcal{O}(1)$  regime is therefore not an artefact of any particular dataset but a robust feature of the parameter space occupied by remote oceanic swell. The full four-panel SNR analysis is presented in Extended Data Fig. 5.

#### D. Variance decomposition and error budget

Taking the logarithm of the scaling law,  $\ln \mu_E = \ln C_{\text{tot}} + \frac{2}{3} \ln \varepsilon_{\text{eff}} - \frac{7}{3} \ln g + \frac{8}{3} \ln \omega$ , gives logarithmic response coefficients  $+2/3$  for  $\varepsilon_{\text{eff}}$ ,  $+8/3$  for  $\omega$ , and  $+1$  for  $C_{\text{tot}}$ . The ordering is fortunate. Swell frequency, the best-measured quantity, enters with the largest exponent, while  $\varepsilon_{\text{eff}}$ , uncertain by factors of 2-3, enters with the weakest. In addition to these three parametric uncertainties, two further sources enter. The significant wave height  $H_s$ , which controls the roughness depth  $z_0 = c_b H_{s,w}$  in the wall-law profile (S.144) and thereby affects  $\varepsilon_{\text{eff}}$  through  $E_1(2kz_0)$ . The ray-path geometry, whose uncertainty arises from great-circle deviations due to refraction and current advection. Because  $\mu_E \propto \varepsilon_{\text{eff}}^{2/3}$ , the  $H_s$  uncertainty propagates with the same response coefficient  $2/3$  as  $\varepsilon_{\text{eff}}$  itself, while  $\sigma_{\text{ray}}$  enters additively in log-space as a path-length error. Assuming independent, log-normally distributed errors, the environmental prediction uncertainty propagates as

$$\sigma_{\ln \mu, \text{env}}^2 = \left(\frac{2}{3}\right)^2 \sigma_{\ln \varepsilon}^2 + \sigma_{\ln C}^2 + \left(\frac{2}{3}\right)^2 \sigma_{\ln H_s}^2 + \left(\frac{8}{3}\right)^2 \sigma_{\ln \omega}^2 + \sigma_{\text{ray}}^2, \quad (\text{S.211})$$

giving  $\sigma_{\ln \mu, \text{env}} \approx 0.57$ , corresponding to a factor-of- $e^{0.57} \approx 1.8$  uncertainty in  $\mu_E$  (and equivalently in  $\langle \hat{\mu} \rangle = 2\mu_E$ , since the factor of 2 holds at leading order),

$$\sigma_{\text{env}}^{(\mu)} \approx \sqrt{\exp(\sigma_{\ln \mu, \text{env}}^2) - 1} \bar{\mu}_{\text{obs}} \approx 0.62 \bar{\mu}_{\text{obs}}. \quad (\text{S.212})$$

Here  $\bar{\mu}_{\text{obs}}$  denotes the observed ensemble-mean estimator value  $\langle \hat{\mu} \rangle_{\text{obs}}$ . This environmental error budget moves  $\langle \hat{\mu} \rangle$  along the positive half-axis but cannot change its sign. The non-negativity theorem guarantees  $\mu_E \geq 0$ . The total variance of the single-path estimator  $\hat{\mu}$  decomposes into three independent contributions,

$$\sigma_{\hat{\mu}}^2 = \underbrace{\sigma_{\text{int}}^2}_{\text{intrinsic}} + \underbrace{[\sigma_{\text{env}}^{(\mu)}]^2}_{\text{environmental}} + \underbrace{\sigma_{\text{obs}}^2}_{\text{observational}}. \quad (\text{S.213})$$

For a representative trans-oceanic swell track with  $\bar{\mu}_{\text{obs}} = 0.8 \times 10^{-7} \text{ m}^{-1}$  (corresponding to  $\mu_E = \bar{\mu}_{\text{obs}}/2 \approx 0.40 \times 10^{-7} \text{ m}^{-1}$ ),  $L = 10^7 \text{ m}$  and  $c_0 = 1$ :  $\sigma_{\text{int}} \approx \sqrt{2\mu_E/L} = \sqrt{c_0 \bar{\mu}_{\text{obs}}/L} \approx 0.89 \times 10^{-7} \text{ m}^{-1}$  (from Eq. (S.195)),  $\sigma_{\text{env}}^{(\mu)} \approx 0.50 \times 10^{-7} \text{ m}^{-1}$  (from Eq. (S.212)),  $\sigma_{\text{obs}} \approx 0.63 \times 10^{-7} \text{ m}^{-1}$  (root sum of squares of the four altimetric error sources identified in the altimetric error analysis [34], see Section C for the breakdown). In units of  $10^{-7} \text{ m}^{-1}$ ,

$$\sigma_{\text{int}} \approx 0.89, \quad \sigma_{\text{env}}^{(\mu)} \approx 0.50, \quad \sigma_{\text{obs}} \approx 0.63, \quad (\text{S.214})$$

giving variance fractions of approximately 55%, 17%, and 28% respectively (Extended Data Fig. 6a). The predicted total scatter  $\sigma_{\text{total}} = \sqrt{0.89^2 + 0.50^2 + 0.63^2} \approx 1.3 \times 10^{-7} \text{ m}^{-1}$  is within

$\sim 9\%$  of the reported  $1.2 \times 10^{-7} \text{ m}^{-1}$  [34], well inside the rounding uncertainty of the component estimates. The three variance components are estimated from independent information. Intrinsic from the Green-Kubo kernel, environmental from reanalysis uncertainties, and observational from the altimeter error analysis. Ensemble-averaging over  $M$  independent events reduces the intrinsic and observational contributions as  $1/\sqrt{M}$ , while the environmental bias remains fixed,

$$\sigma_{\hat{\mu}}^2 \approx \frac{\sigma_{\text{int}}^2 + \sigma_{\text{obs}}^2}{M} + [\sigma_{\text{env}}^{(\mu)}]^2. \quad (\text{S.215})$$

The crossover scale

$$M_{\times} \equiv \frac{\sigma_{\text{int}}^2 + \sigma_{\text{obs}}^2}{[\sigma_{\text{env}}^{(\mu)}]^2} \approx \frac{0.89^2 + 0.63^2}{0.50^2} \approx 5 \quad (\text{S.216})$$

separates the random-scatter-limited regime ( $M < M_{\times}$ ) from the environment-limited regime ( $M > M_{\times}$ ) (Extended Data Fig. 6b). The altimeter dataset [34] ( $M = 202$ ) is firmly environment-limited. The random contribution to the ensemble-mean uncertainty is only  $\approx 1/(\mathcal{S}\sqrt{M}) \sim 8\%$ . The full four-panel variance anatomy is presented in Extended Data Fig. 7.

### E. Negative attenuation rates and discriminating tests

The three sources of scatter in Eq. (S.213) contribute to the probability of observing  $\hat{\mu} < 0$  through physically distinct mechanisms. Environmental variability does not challenge the theorem-level non-negativity of the local physical rate  $\mu_E$ . The Green-Kubo coefficient is  $\Gamma \geq 0$  for any stationary bath. However, because different tracks sample different  $\varepsilon_{\text{eff}}$  environments, the environmental term does contribute to the spread of the finite-length estimator  $\hat{\mu}$  across the ensemble of tracks. In the variance decomposition (S.213) it enters as a between-track contribution to the positive part of the distribution. It does not by itself generate a negative tail for any individual track whose true  $\mu_E > 0$ , but it broadens the population from which the intrinsic and observational channels can push individual estimates below zero. Observational methodology noise alone, with  $\sigma_{\text{obs}} \approx 0.63 \times 10^{-7}$ , would give  $P_{\text{neg}}^{(\text{obs})} = \Phi(-\bar{\mu}_{\text{obs}}/\sigma_{\text{obs}}) \approx 10\%$ . Combining intrinsic and observational contributions *conditioned on a representative track mean*  $\bar{\mu}_{\text{obs}}$  (environmental variability shifts the mean from track to track but does not itself generate negative estimates for tracks with  $\mu_E > 0$ ),

$$P_{\text{neg}}^{(\text{cond})} \approx \Phi\left(\frac{-\bar{\mu}_{\text{obs}}}{\sqrt{\sigma_{\text{int}}^2 + \sigma_{\text{obs}}^2}}\right) \approx \Phi(-0.73) \approx 23\%, \quad (\text{S.217})$$

consistent with the observed 24%. The intrinsic SNR depends on frequency through  $\mu_E(\omega) \propto \omega^{8/3}$ ,

$$\mathcal{S}_{\text{int}}(\omega) \propto \omega^{4/3} \sqrt{L}. \quad (\text{S.218})$$

At fixed  $L$ , low-frequency swell has smaller  $\mathcal{S}$  and a larger intrinsic negative fraction than high-frequency swell. Taking  $\bar{\mu}_{\text{obs}} = 0.8 \times 10^{-7} \text{ m}^{-1}$  at  $T = 15$  s with  $\mathcal{S}_{\text{int}} \approx 0.89$  as a reference,  $\mathcal{S}_{\text{int}}(T) \propto T^{-4/3}$  gives  $\mathcal{S}_{\text{int}} \approx 1.04$  at  $T = 12$  s and  $\approx 0.57$  at  $T = 19$  s, corresponding to intrinsic negative fractions

$$P_{\text{neg}}^{(\text{int})}(T) = \Phi(-\mathcal{S}_{\text{int}}(T)) \sim 15\% \text{ at } T = 12 \text{ s}, \quad \sim 29\% \text{ at } T = 19 \text{ s}. \quad (\text{S.219})$$

Including observational noise, the total negative fraction rises from  $\sim 17\%$  at  $T = 12$  s to  $\sim 33\%$  at  $T = 19$  s—roughly a factor-of-two increase across the swell band. By contrast, the observational methodology noise has no strong frequency dependence, so  $P_{\text{neg}}^{(\text{obs})}(T)$  would be nearly flat. The discriminating test is therefore: *Bin the swell tracks by period and compute  $P_{\text{neg}}(T)$  in each bin. A steep increase toward long periods ( $P_{\text{neg}} \propto \Phi(-\omega^{4/3}\sqrt{L})$ ) confirms the intrinsic encounter mechanism. A nearly frequency-independent  $P_{\text{neg}}$  is consistent with observational noise alone.*

A complementary test bins by propagation distance  $L$  and checks whether  $P_{\text{neg}}(L)$  decreases with  $L$ , as predicted by  $\mathcal{S} \propto \sqrt{L}$  for the intrinsic component. These tests form a natural hierarchy ranked by discriminating power. The 8/3 frequency exponent is the most robust, assembled entirely from kinematics and turbulence scaling and insensitive to the environmental error budget. Satellite data yield  $b = 3.07$  with 95% CI [2.11, 4.04] [34], and the theoretical  $8/3 \approx 2.67$  lies within this interval. The frequency-resolved negative-rate function At fixed  $\varepsilon_{\text{eff}}$ , path length and prefactor normalisation, the period dependence of  $P_{\text{neg}}(T)$  is controlled by the  $\omega^{8/3}$  scaling through  $\mathcal{S} \propto \omega^{4/3}$ . The absolute level of  $P_{\text{neg}}$  still depends on  $C_{\text{tot}}\varepsilon_{\text{eff}}^{2/3}$  through the overall signal-to-noise ratio. This period trend discriminates against both observational noise (flat in  $T$ ) and environmental uncertainty (non-negative). The absolute magnitude of  $\bar{\mu}_{\text{obs}}$  is the least discriminating test. It depends on the full error budget. Agreement to within a factor of  $\sim 2$  is consistent with that budget but has limited discriminating power. The analysis reveals a three-tier spatial structure,

$$\underbrace{\ell_{\text{corr}} \sim 60 \text{ m}}_{\text{encounter scale}} \ll \underbrace{L_{\text{det}} \sim 1.25 \times 10^4 \text{ km}}_{\text{emergence / regression } e\text{-folding}} \sim \underbrace{L_{\text{ocean}} \sim 10^4 \text{ km}}_{\text{trans-basin path}}. \quad (\text{S.220})$$

The encounter scale and the emergence scale are separated by  $1/\delta^2 \sim 10^5$ , reflecting the enormous number of nearly symmetric interactions needed to produce an  $O(1)$  fractional energy loss. That  $L_{\text{det}} \sim L_{\text{ocean}}$  is not a coincidence. The turbulence dissipation rates prevailing in the remote mixed layer yield attenuation rates whose regression  $e$ -folding distances match the scale of Earth's ocean basins. Single-ray observations therefore occupy a regime of marginal detectability- $\mu_E(\omega)$  is strictly positive and well-defined, but  $\hat{\mu}$  carries relative uncertainties of order unity and negative estimates occur with probability  $\Phi(-\mathcal{S}) \sim 15\text{-}25\%$ . Ensemble averages converge rapidly. For  $M \sim 200$  events the sample-mean uncertainty is  $(\mathcal{S}\sqrt{M})^{-1} \sim 8\%$ .

## S7. Comparison with satellite observations

The scaling law and the CLT bridge (Eq. S.151) imply order-unity single-track scatter for basin-scale remote-swell paths, so a non-negligible fraction of finite-length regression estimates should satisfy  $\hat{\mu} < 0$ . This section places that prediction in the context of two published satellite data sets. The 202-event altimeter-WW3 analysis [34] and the 10-year Envisat SAR analysis [19]. The former is best viewed as a historical benchmark and methodological precursor of the 241-track sample used in the main text, whereas the latter provides a distinct SAR-based product. Because the two studies report different subsets of  $\{\bar{\mu}_{\text{obs}}, \sigma_{\hat{\mu}}, P_{\text{neg}}\}$ , the comparisons below combine direct tests with consistency checks rather than a single uniform likelihood analysis. Section C then uses the Monte Carlo error analysis of the tracking pipeline to quantify the non-intrinsic variance floor.

**Signal-to-noise ratios used in this section.** Different observational products report different subsets of  $\{\bar{\mu}_{\text{obs}}, \sigma_{\hat{\mu}}, P_{\text{neg}}\}$ . To prevent ambiguity we explicitly distinguish three SNRs:

1. **Intrinsic SNR** (physics-only, encounter noise),

$$\mathcal{S}_{\text{int}} \equiv \frac{\langle \hat{\mu} \rangle}{\sigma_{\text{int}}} = \sqrt{\frac{\langle \hat{\mu} \rangle L_{\text{eff}}}{c_0}} \approx \sqrt{\frac{\bar{\mu}_{\text{obs}} L_{\text{eff}}}{c_0}}, \quad (\text{S.221})$$

using  $\sigma_{\text{int}}^2 = c_0 \langle \hat{\mu} \rangle / L_{\text{eff}}$  (Eq. S.213) with  $c_0 = 1$  (Eq. S.73).

2. **Total SNR** (dataset-implied when both sample mean and sample SD are reported),

$$\mathcal{S}_{\text{tot}} \equiv \frac{\bar{\mu}_{\text{obs}}}{\sigma_{\hat{\mu}}}, \quad (\text{S.222})$$

which folds encounter noise together with observational methodology noise and environmental variability.

3. **Effective SNR** (when only the negative fraction is available),

$$\mathcal{S}_{\text{eff}} \equiv -\Phi^{-1}(P_{\text{neg,obs}}) \quad \text{so that} \quad P_{\text{neg,obs}} = \Phi(-\mathcal{S}_{\text{eff}}). \quad (\text{S.223})$$

This is a *back-calculated summary statistic* and therefore supports only a *consistency check* on plausible SNR levels, not an independent test of the functional form  $P(\hat{\mu} < 0) = \Phi(-\mathcal{S})$ .

### A. Altimeter tracking dataset

A historical benchmark is the far-field altimeter-WW3 analysis [34], which contains 202 swell events with periods 12-18s and wavelengths 250-500m. The reported ensemble statistics are  $\bar{\mu}_{\text{obs}} = 0.8 \times 10^{-7} \text{ m}^{-1}$ ,  $\sigma_{\hat{\mu}} = 1.2 \times 10^{-7} \text{ m}^{-1}$ , and 49/202 negative estimates (24.3%). The same study also notes that the dissipation-rate histogram is approximately normal-like and that most negative values are not statistically significant once their estimated methodology errors are taken into account.

To set the physical scale, take a representative basin-scale path with  $L_{\text{eff}} = 10^7 \text{ m}$ . This is not a fit to the Jiang sample, only a scale-setting estimate for a trans-oceanic path. Using  $\bar{\mu}_{\text{obs}} = 0.8 \times 10^{-7} \text{ m}^{-1}$  and  $c_0 = 1$  gives

$$\mathcal{S}_{\text{int}} = \sqrt{\frac{\bar{\mu}_{\text{obs}} L_{\text{eff}}}{c_0}} = \sqrt{\frac{0.8 \times 10^{-7} \times 10^7}{1}} \approx 0.89, \quad (\text{S.224})$$

placing typical basin-scale swell tracks in the marginal-detection regime ( $\mathcal{S}_{\text{int}} \lesssim 1$ ). The intrinsic model therefore predicts

$$P_{\text{neg}}^{(\text{int})} = \Phi(-\mathcal{S}_{\text{int}}) = \Phi(-0.89) \approx 19\%, \quad (\text{S.225})$$

close to the observed 24.3% and slightly below, as expected when non-intrinsic variance contributions are included (Section C).

From the reported sample mean and sample standard deviation,

$$\mathcal{S}_{\text{tot}} = \frac{\bar{\mu}_{\text{obs}}}{\sigma_{\hat{\mu}}} = \frac{0.8}{1.2} \approx 0.67. \quad (\text{S.226})$$

Under the Gaussian approximation suggested by the normal-like histogram reported in that study,

$$P(\hat{\mu} < 0) = \Phi(-\mathcal{S}_{\text{tot}}) = \Phi(-0.67) \approx 25\%, \quad (\text{S.227})$$

in close agreement with the observed 24.3%. The Jiang dataset therefore already exhibits the key qualitative signature of the theory. Broad, near-Gaussian single-track scatter with a substantial negative tail. The sharper path-length and frequency discriminating tests are carried out using the 241-track sample analysed in the main text and in Section E.

### B. SAR tracking dataset

A distinct satellite product is the 10-year Envisat SAR wave-mode analysis [19], which reports 1050 swell tracks from 460 storm events. Of these, 910 fitted dissipation rates are positive and 140 are negative. The statement that 423 cases are “not statistically different from zero” refers to a subset of the same 1050 tracks, not to an additional set of fitted rates. After imposing a 95% confidence criterion, the retained subset contains 606 positive and 21 negative cases.

Because this product does not report  $\bar{\mu}_{\text{obs}}$  and  $\sigma_{\hat{\mu}}$  in a form directly comparable to the altimeter statistics, we characterise it via the effective SNR inferred from the negative fraction. For the full sample,

$$P_{\text{neg,obs}} = \frac{140}{1050} \approx 0.133 \quad \implies \quad \mathcal{S}_{\text{eff}} \approx 1.11. \quad (\text{S.228})$$

This is a back-calculated consistency check on plausible SNR levels (Eq. S.223), not an independent validation of  $P(\hat{\mu} < 0) = \Phi(-\mathcal{S})$ .

For the 95% significant subset,

$$P_{\text{neg,obs}} = \frac{21}{627} \approx 0.034 \implies \mathcal{S}_{\text{eff}} \approx 1.82, \quad (\text{S.229})$$

because  $\Phi(-1.82) \approx 3.4\%$ . The drop from 13.3% to 3.4% under stricter quality control is qualitatively consistent with preferential removal of low-SNR tracks. The SAR dataset therefore supports the same broad picture: order-unity pathwise scatter, a non-negligible negative tail before strict filtering, and a strong sensitivity of that tail to data-quality thresholds.

### C. Variance budget and the Monte Carlo gap

The historical altimeter benchmark raises a specific question: can the broad single-track scatter be explained by deterministic methodology noise alone? The answer is no. The observational methodology noise  $\sigma_{\text{obs}} \approx 0.63 \times 10^{-7} \text{ m}^{-1}$  is computed from the four independent altimetric error sources identified in the altimetric error analysis [34] (their Section 3):  $H_s$  measurement precision ( $\approx 0.1$ ), swell-partition approximation ( $\approx 0.3$ ), fitting-method sensitivity ( $\approx 0.2$ ), and point-source model deviation ( $\approx 0.5$ ), all in units of  $10^{-7} \text{ m}^{-1}$ . Added in quadrature,  $\sigma_{\text{obs}} = \sqrt{0.1^2 + 0.3^2 + 0.2^2 + 0.5^2} \approx 0.63 \times 10^{-7} \text{ m}^{-1}$ . An end-to-end Monte Carlo analysis of the tracking pipeline [61] provides an independent check on this noise floor. The observational term accounts for only

$$\frac{\sigma_{\text{obs}}^2}{\sigma_{\hat{\mu}}^2} = \left(\frac{0.63}{1.20}\right)^2 \approx 0.28 \quad (\text{S.230})$$

of the observed variance in the altimeter sample. A purely deterministic single-track picture therefore leaves roughly 72% of the variance unexplained.

In the present framework that missing variance is supplied by intrinsic wave-eddy encounter statistics. Using the leading-order FDR-II/Itô baseline  $c_0 = 1$ , together with  $\bar{\mu}_{\text{obs}} = 0.8 \times 10^{-7} \text{ m}^{-1}$  and  $L_{\text{eff}} = 10^7 \text{ m}$ , gives

$$\sigma_{\text{int}} = \sqrt{\frac{c_0 \bar{\mu}_{\text{obs}}}{L_{\text{eff}}}} \approx 0.89 \times 10^{-7} \text{ m}^{-1}. \quad (\text{S.231})$$

Including the propagated environmental contribution  $\sigma_{\text{env}}^{(\mu)} \approx 0.50 \times 10^{-7} \text{ m}^{-1}$  (Section D) then gives

$$\sigma_{\text{tot}} = \sqrt{\sigma_{\text{int}}^2 + \sigma_{\text{obs}}^2 + (\sigma_{\text{env}}^{(\mu)})^2} \approx 1.20 \times 10^{-7} \text{ m}^{-1}, \quad (\text{S.232})$$

matching the observed  $1.20 \times 10^{-7} \text{ m}^{-1}$ . The variance budget is therefore approximately closed without any additional fit to the single-track scatter: deterministic methodology noise alone is too small, whereas methodology noise, environmental variability, and the intrinsic SVF term naturally recover the observed scale.

This comparison should not be over-read as a claim that real-ocean tracks must satisfy the near-independent-encounter baseline  $c_0 = 1$  exactly. In the theory,  $c_0 = 1$  is the clean leading-order reference. Weak along-ray dependence renormalises only the second moment, not the first (Section B). This is consistent with what is seen in the 241-track main-text analysis. The first-moment scaling factor remains consistent with  $\beta = 1$ , while any effective renormalisation is absorbed into  $c_0$  and its partial degeneracy with  $\sigma_{\text{meas}}$ .

Two findings of the pipeline Monte Carlo study [61] acquire a sharper interpretation in the present framework. First, the positive correlation sometimes found between fitted  $\hat{\mu}$  and the initial wave-height estimate can arise algebraically because both quantities are inferred from the same exponential regression. It is therefore not, by itself, diagnostic of a distinct amplitude-dependent or air-side dissipation mechanism. Second, when  $\mathcal{S} = \mathcal{O}(1)$ , single-track

fitting cannot discriminate competing functional forms of swell attenuation. Functional-form inference must instead come from ensemble means and distribution-level tests.

The same variance decomposition also clarifies the averaging regime. The crossover between the random-scatter-limited regime and the environment-limited floor occurs at only  $M_{\times} \sim 5$  tracks (Eq. S.216), so the 202-event Jiang benchmark is already deeply environment-limited. Adding more events reduces the sampling noise, but cannot eliminate the environmental floor set by path-to-path variability in  $\varepsilon_{\text{eff}}$ .

#### D. Fixed-design Monte Carlo validation of the inference layer

The variance budget shows that the theoretical noise model is consistent with the observed scatter. A separate question is whether the profile-likelihood inference procedure itself is well calibrated: if the true coefficients were exactly  $(\beta, c_0) = (1, 1)$ , would the pipeline recover them without systematic bias?

This question is distinct from the forward observational Monte Carlo performed by Jiang et al. [61]. There, a true attenuation rate was prescribed on an idealised swell track, retrieval errors were injected, and the resulting distribution of fitted  $\hat{\mu}$  was examined. That analysis quantifies how measurement and sampling errors propagate into attenuation estimates. The present experiment addresses a different question: whether the statistical inference machinery—the heteroscedastic likelihood, the optimiser, and the profile confidence intervals—is internally calibrated under the assumed model family. It therefore tests the inference layer itself, not observational realism in the sense of Jiang et al. The two exercises are complementary, not redundant.

We therefore perform a fixed-design parameter-recovery test. The generative model is the CLT bridge (Eq. S.151) restricted to the pure SVF channel. Writing  $\mu_{\text{svf},i}$  for the path-averaged observable-level SVF predictor of track  $i$  (equal to  $2\mu_{E,i}$  under homogeneous along-ray conditions), the synthetic observations are

$$\hat{\mu}_i^{(r)} \sim \mathcal{N}(\beta^* \mu_{\text{svf},i}, c_0^* \beta^* \mu_{\text{svf},i} / L_i + \sigma_{\text{meas}}^2), \quad (\text{S.233})$$

with imposed truth  $(\beta^*, c_0^*, \sigma_{\text{meas}}^*)$ . Here  $\beta$  is the first-moment scaling factor defined in the main text ( $\hat{\mu}_{\text{obs}} = \beta \mu_{\text{model}}$ ), not the local step-variance ratio  $\beta_{\xi}$  of Section A.  $c_0$  is the variance-to-mean ratio ( $c_0 = 1$  at the near-independent-encounter baseline, equivalent to  $\mathcal{R} = 1$  in Eq. S.151), and  $\sigma_{\text{meas}}$  is the additive methodology noise floor. Under these identifications, Eq. (S.233) reduces to the CLT-bridge variance  $2\mu_{E,i}\mathcal{R}/L_i + \sigma_{\text{meas}}^2$  when  $\mu_{\text{svf},i} = 2\mu_{E,i}$ ,  $c_0 = \mathcal{R}$ , and  $\beta = 1$ . The near-independent-encounter baseline is therefore the special case  $(\beta, \mathcal{R}) = (1, 1)$ . The real 241-track design matrix  $(L_i, \mu_{\text{svf},i})$  is held fixed throughout; only the observations are regenerated. For each synthetic dataset the negative log-likelihood

$$\text{NLL}(\beta, c_0, \sigma_{\text{meas}}) = \frac{1}{2} \sum_{i=1}^N \left[ \ln \sigma_i^2 + \frac{(\hat{\mu}_i - \beta \mu_{\text{svf},i})^2}{\sigma_i^2} \right], \quad \sigma_i^2 = c_0 \beta \mu_{\text{svf},i} / L_i + \sigma_{\text{meas}}^2, \quad (\text{S.234})$$

is minimised over  $(\beta, c_0, \sigma_{\text{meas}})$  by L-BFGS-B with a  $3 \times 3 \times 3 = 27$ -point multi-start grid. Profile-likelihood 95% confidence intervals for  $\beta$  and  $c_0$  are obtained by adaptive bisection. Starting from the MLE, the profiled NLL is stepped outward until  $\Delta\text{NLL} > \frac{1}{2}\chi_{0.95}^2(1) \approx 1.92$ ; the crossing is then located to  $10^{-4}$  precision by bisection. Joint rejection of the true parameter vector uses  $\Delta\text{NLL}(\beta^*, c_0^*, \sigma_{\text{meas}}^*) > \frac{1}{2}\chi_{0.95}^2(3) \approx 3.91$ .

The deterministic laminar viscous correction is excluded from both generator and likelihood because it does not participate in the heteroscedastic fluctuation law. The experiment therefore validates the stochastic SVF inference layer, not every deterministic sub-component. For each scenario,  $R = 2000$  independent replications are performed. From the recovered triplets  $(\hat{\beta}^{(r)}, \hat{c}_0^{(r)}, \hat{\sigma}_{\text{meas}}^{(r)})$  we compute the bias  $(\tilde{\theta} - \theta^*)$ , standard deviation, 95% profile-likelihood coverage (the fraction of replicates whose CI contains the true value), and the joint false-rejection rate.

Three noise scenarios are considered: a baseline  $\sigma_{\text{meas}}^* = 0.63 \times 10^{-7} \text{ m}^{-1}$  matching the quadrature estimate from altimetric error sources [34], a low-noise case ( $0.30 \times 10^{-7}$ ), and a high-noise case ( $1.00 \times 10^{-7}$ ). In all three, the imposed truth is  $(\beta^*, c_0^*) = (1, 1)$ . Table S2 summarises the results. In every scenario the bias is negligible:  $|\text{bias}(\hat{\beta})| < 0.003$  and  $|\text{bias}(\hat{c}_0)| < 0.02$ . The 95% profile-likelihood coverage rates are 94.6–96.0% for  $\beta$  and 94.6–94.9% for  $c_0$ , consistent with the nominal level. The joint false-rejection rate—the fraction of replicates in which the true parameter vector is rejected at the 95% level under a  $\chi^2(3)$  threshold—is 3.8–5.4%, again consistent with the nominal 5%. The recovered  $\hat{\beta}$  and  $\hat{c}_0$  are negatively correlated ( $\rho \approx -0.58$  to  $-0.75$ ), reflecting the partial degeneracy between the mean-scaling and variance-scaling roles of  $\beta$ . This correlation is visible in Extended Data Fig. 4d but does not compromise identifiability: both marginal standard deviations remain moderate ( $\text{SD}(\hat{\beta}) \approx 0.14$ – $0.17$ ,  $\text{SD}(\hat{c}_0) \approx 0.21$ – $0.37$ ).

We emphasise the scope of this validation. The recovery experiment shows that the inference machinery is unbiased and properly calibrated *conditional on* data drawn from the assumed model family. It does not, by itself, establish that real-ocean tracks obey that model. That external consistency must instead come from the independent evidence assembled in the main text: the frequency and environmental dependence of the ensemble-mean decay rate, the negative-rate fraction, and the residual structure (Figs. 4 and 5).

**Table S2:** Fixed-design Monte Carlo recovery ( $R = 2000$ ,  $(\beta^*, c_0^*) = (1, 1)$ ). Bias and standard deviation are computed over the  $R$  replications. Coverage is the fraction of replicates whose 95% profile-likelihood CI contains the true value. Joint rejection uses  $\Delta\text{NLL} > \frac{1}{2}\chi_{0.95}^2(3)$ .

| Scenario   | $\sigma_{\text{meas}}^*$<br>( $\times 10^{-7} \text{ m}^{-1}$ ) | $\text{bias}(\hat{\beta})$ | $\text{SD}(\hat{\beta})$ | $\text{bias}(\hat{c}_0)$ | $\text{SD}(\hat{c}_0)$ | Cov. $\beta$<br>(%) | Cov. $c_0$<br>(%) | Joint rej.<br>(%) |
|------------|-----------------------------------------------------------------|----------------------------|--------------------------|--------------------------|------------------------|---------------------|-------------------|-------------------|
| Baseline   | 0.63                                                            | +0.003                     | 0.15                     | +0.01                    | 0.25                   | 95.4                | 94.6              | 5.4               |
| Low noise  | 0.30                                                            | −0.000                     | 0.14                     | +0.01                    | 0.21                   | 94.6                | 94.9              | 3.8               |
| High noise | 1.00                                                            | +0.003                     | 0.17                     | +0.02                    | 0.37                   | 96.0                | 94.9              | 4.4               |

## E. Cross-dataset consistency

Table S3 collects the negative-rate fractions from three independent observational sources, with alternative SNR interpretations shown where relevant. For the two altimeter samples the associated SNR estimates follow the forward model of Sections A–C; for the SAR rows an effective SNR is inferred from the observed negative fraction for consistency mapping only (Eq. S.223). All three sources sit in the  $\mathcal{S} = \mathcal{O}(1)$  regime, confirming that the broad single-track scatter and its substantial negative tail are not artefacts of a single retrieval algorithm or observation platform. The differences in aggregate  $P_{\text{neg}}$  across datasets (26%, 24%, 13%) reflect differences in period and path-length distributions, environmental sampling, and measurement-noise characteristics rather than any inconsistency in the underlying physics. The sharper quantitative tests—frequency and path-length dependence, profile likelihood for  $\beta$ —are carried by the 241-track sample analysed in the main text.

## S8. Amplitude independence of the attenuation rate

The stochastic vortex-force theory predicts that, within the far-field, non-breaking regime governed by Assumptions A1–A5, the attenuation rate  $\mu_E$  is independent of wave amplitude. Because the coupling is linear in amplitude (A4,  $F_k \propto a_k$ ), the force autocorrelation factorises as  $\langle F_k(0) F_k^*(t) \rangle = \langle |a_k|^2 \rangle G_k(t)$ , where  $G_k$  depends only on the bath statistics. The wave energy scales as  $E_k = \frac{1}{2} \langle |a_k|^2 \rangle$  (convention of Section S2). This factor cancels identically in the Green-Kubo expression  $\mu_E \propto (2E_k)^{-1} \int_0^\infty \langle F_k(0) F_k^*(t) \rangle dt = \frac{1}{2} \int_0^\infty G_k(t) dt$ , so  $\mu_E$  depends only on the turbulence parameters ( $\varepsilon$ ,  $\tau_{\text{corr}}$ ) and on the wavenumber  $k$ . The damping rate is a material

**Table S3:** Observed and model-consistent negative-rate fractions. For the altimeter rows the SNR is derived from the forward model; rows marked † report  $\mathcal{S}_{\text{eff}}$  inferred from  $P_{\text{neg,obs}}$  (Eq. S.223), so the listed  $P_{\text{neg}}^{\text{pred}}$  matches the observation by construction and is shown only for bookkeeping.

| Dataset                                     | $N$  | SNR used                                | $P_{\text{neg}}^{\text{pred}}$ | $P_{\text{neg}}^{\text{obs}}$ |
|---------------------------------------------|------|-----------------------------------------|--------------------------------|-------------------------------|
| Altimeter (this work)                       | 241  | $\mathcal{S}_{\text{tot}} \approx 0.73$ | 23%                            | 26%                           |
| Altimeter (historical benchmark; intrinsic) | 202  | $\mathcal{S}_{\text{int}} \approx 0.89$ | 19%                            | 24.3%                         |
| Altimeter (historical benchmark; total)     | 202  | $\mathcal{S}_{\text{tot}} \approx 0.67$ | 25%                            | 24.3%                         |
| SAR (full sample)†                          | 1050 | $\mathcal{S}_{\text{eff}} \approx 1.11$ | 13.3%                          | 13.3%                         |
| SAR (95% significant subset)†               | 627  | $\mathcal{S}_{\text{eff}} \approx 1.82$ | 3.4%                           | 3.4%                          |

property of the turbulent bath at fixed  $k$ , analogous to how the Stokes drag on a Brownian particle depends on solvent viscosity and particle geometry but not on the particle’s kinetic energy.

Two assumptions are the structural ingredients for this cancellation. A4 (linear coupling,  $F_k \propto a_k$ ) ensures that  $|a_k|^2$  can be factored out of the force autocorrelation. A5 (bath statistics independent of swell energy) is the weak-probe condition quantified in Section S2. A2 (slow amplitude variation) justifies treating  $a_k$  as quasi-constant over the Green-Kubo correlation window  $\tau \lesssim \tau_c$ , so that  $a_k(0) a_k^*(\tau) \approx |a_k|^2$ . For trans-oceanic swell all three hold with large margins. Nonlinear corrections enter at  $\mathcal{O}(\delta^2) \sim 10^{-6}$ - $10^{-4}$  (with  $\delta = u'/c_g \sim 10^{-3}$ - $10^{-2}$ ), and the rate of energy extraction from the swell per unit surface area ( $\sim 5 \times 10^{-3} \text{ W m}^{-2}$  for  $H_s \sim 2 \text{ m}$ ) perturbs the mixed-layer NESS by only  $\sim 5 \times 10^{-3}$ - $5 \times 10^{-2}$  of the wind power ( $\sim 0.1$ - $1 \text{ W m}^{-2}$ ) maintaining the bath. Throughout this section we implicitly invoke Assumption A3 (Section S2). This prediction stands in sharp contrast to the amplitude-dependent swell-dissipation parameterisation used in the empirical amplitude-dependent source-term family for WAVEWATCH III [64–66]. In the current standard implementation [65], the swell source term is

$$S_{\text{swl}}(k, \theta) = -\frac{2}{3} b_1 \sigma \sqrt{B_n(k)} F(k, \theta), \quad b_1 = \frac{1}{2} B_1 H_s k_p, \quad (\text{S.235})$$

where  $F(k, \theta) = N(k, \theta) \sigma$  is the energy spectrum,  $N$  the action density,  $B_n(k)$  the spectral saturation ( $\propto N \sigma k^3$ ), and  $B_1$  a tunable coefficient. Under a uniform amplitude scaling of the swell spectrum at fixed spectral shape, the three amplitude-dependent factors combine as  $b_1 \propto H_s \propto \sqrt{N}$ ,  $\sqrt{B_n} \propto \sqrt{N}$ ,  $F \propto N$ , giving  $S_{\text{swl}} \propto N^2$ . The implied attenuation rate is therefore quadratic in amplitude,

$$\mu_{\text{emp}}(k, \theta) \equiv -\frac{S_{\text{swl}}(k, \theta)}{F(k, \theta)} \propto N \propto a^2 \propto H_s^2. \quad (\text{S.236})$$

Over the range of initial wave heights in the altimeter dataset ( $H_{s,0} = 1.3$ - $4.9 \text{ m}$ ) [34], this predicts a factor of  $(4.9/1.3)^2 \approx 14$  variation in  $\mu_E$ -readily detectable in 241 distinct swell tracks. Table S4 summarises the contrasting predictions.

**Table S4:** Predicted amplitude dependence: SVF theory versus the empirical parameterisation.

| Property                                               | SVF (this work)       | Empirical             |
|--------------------------------------------------------|-----------------------|-----------------------|
| $\mu_E$ dependence on $H_s$                            | $\mu_E \propto H_s^0$ | $\mu_E \propto H_s^2$ |
| Predicted variation over $H_s = 1.3$ - $4.9 \text{ m}$ | $\times 1$            | $\times 14$           |
| Observed $H_s$ - $\hat{\mu}$ correlation (241 tracks)  | $r = 0.00$            | -                     |
| Frequency exponent                                     | $\omega^{8/3}$        | depends on $B_n$      |

We test the prediction using satellite tracks retained under the selection criteria ( $250 \leq \lambda \leq 500 \text{ m}$ ) [34]. A scatter plot of  $\hat{\mu}$  versus  $H_{s,0}$  for all 241 tracks yields  $r = 0.00$  ( $p = 0.98$ ),

consistent with no association (Extended Data Fig. 3a). To control for the dominant frequency dependence  $\mu_E \propto \omega^{8/3}$ , we partition the data into three period bins (12.5-14s,  $n = 71$ ; 14-15.5s,  $n = 90$ ; 15.5-18s,  $n = 80$ ). Within each bin the correlation is statistically insignificant at the 1% level ( $|r| \leq 0.24$ ), with no consistent sign across bins. The largest  $R^2 \lesssim 0.06$  implies at most  $\sim 6\%$  of the within-bin variability could be attributed to amplitude. This is far below what would be required for a robust quadratic-amplitude trend to emerge over the observed factor-of-3.8 amplitude range (Eq. S.213, Extended Data Fig. 3b). A partial-correlation analysis in which the  $\omega^{8/3}$ -dependence is first regressed out confirms the null result.  $r_{\text{partial}} = 0.07$  ( $p = 0.27$ ) (Extended Data Fig. 3c). Quartile-binned means within each period group show no systematic trend (Extended Data Fig. 3d). The non-detection is particularly significant because the dynamic range of  $H_{s,0}$  (factor  $\sim 3.8$ ) would produce a factor-of-14 signal under the empirical parameterisation, well above the observational noise floor characterised in Section S7 (Eq. S.213). The full four-panel analysis is presented in Extended Data Fig. 3.

The amplitude independence also clarifies the interpretation of pathwise scatter (Section S6). Because  $\mu_E$  does not depend on  $a$ , the pathwise fluctuation in  $\hat{\mu}$  is driven entirely by turbulent encounters along the propagation path and environmental variability, not by variations in wave amplitude. The variance budget of Section D (intrinsic, environmental, and observational components) is therefore cleanly separated from any amplitude effect, and the frequency-resolved discriminating test (Section E) is a pure test of the dissipation mechanism rather than a confounded measure of amplitude-dependent processes.

## S9. Domain of validity: why remote swell isolates the universal dissipation law

The theorem-level non-negativity result and the closed-form remote-swell law have distinct domains of validity. The Green-Kubo sign theorem for the mode-level damping coefficient,  $\Gamma(k) \geq 0$  (Theorem 1), requires Assumptions A1 (wave subspace), A3(i, iii) (stationarity, zero ensemble mean), A5(i) (local stationarity of the bath measure) and A6 (finite memory). In contrast, the factorised closed-form law  $\mu \propto \varepsilon_{\text{eff}}^{2/3} \omega^{8/3}$  and the amplitude-independence of the attenuation rate require the additional remote-swell conditions used in Sections S2-S4. These are quasi-frozen wave amplitude over the correlation window (A2), phase decoupling between the swell and the bath (A3(ii)), linear truncation in wave amplitude (A4), and approximate factorisation of the reference measure (A5(ii)). Remote swell is precisely the regime in which these extra conditions are best satisfied. Wave breaking is rare, local wind input and nonlinear wave-wave transfer are comparatively weak, and the wave phase is set by distant forcing rather than by the local mixed-layer dynamics.

The stochastic vortex-force (SVF) coupling is therefore not unique to swell-it operates whenever waves propagate through turbulence. What is special about remote swell is not the existence of the coupling, but the fact that competing processes are weak enough for the SVF law to be isolated observationally. In actively forced wind seas, by contrast, local forcing correlates the wave field with the turbulent bath, the decoupling conditions deteriorate, and wave breaking typically dominates the wave-energy budget by orders of magnitude over the remote-swell SVF channel [67, 68].

The dominant energy sink for steep wind waves is breaking [66, 67]. For waves approaching a representative deep-water breaking threshold of order  $ak \sim 0.3$  [66, 69], breaking attenuation can reach  $\mu_{\text{brk}} \sim 10^{-5}\text{-}10^{-4} \text{ m}^{-1}$ , corresponding to  $e$ -folding distances of only 10-100 km. For gentle far-field swell with  $ak \sim 0.01\text{-}0.05$ , steepness is far below onset and breaking is strongly suppressed. Under typical open-ocean remote-swell conditions it is therefore negligible to leading order within the present framework.

The phase-averaged Craik-Leibovich (CL) vortex force [6, 7] occupies a different status from the SVF. In the mode-level theory of Sections S1-S2, the CL term is conservative with respect to the resolved swell mode. It carries spectral weight at frequencies 0 and  $2\omega$ , not at the swell

frequency  $\omega$ , and therefore does not enter the Green-Kubo friction coefficient derived from the projected stochastic force. It is nevertheless useful to estimate a separate quasi-steady, signed wave-mean-flow exchange associated with Stokes-shear production [35]. Under the standard quasi-steady assumption that the turbulent stresses are uncorrelated with the fast wave phase, the depth-integrated production scales as

$$\int_{-\infty}^0 P_{ws} dz \sim \tau U_s(0) \cos \Delta\theta = \rho_w u_*^{(w)2} U_s(0) \cos \Delta\theta, \quad (\text{S.237})$$

where  $\tau = \rho_a u_*^{(a)2} = \rho_w u_*^{(w)2}$  is the air-sea interface stress and  $\Delta\theta$  is the angle between the swell propagation direction and the local wind. Converting to a spatial attenuation rate (using  $U_s(0) = a^2 \omega k$ ,  $E = \frac{1}{2} \rho_w g a^2$ ,  $c_g = g/(2\omega)$ ,  $\omega^2 = gk$ ) gives an order-of-magnitude signed rate

$$\mu_{\text{CL}}^{(\text{qs})} \sim \frac{4 u_*^{(w)2} k^2}{g} \cos \Delta\theta. \quad (\text{S.238})$$

This quantity should not be conflated with the positive-definite stochastic attenuation coefficient  $\mu_{\text{SVF}}$ . It is a slow, deterministic modulation of wave-current energy exchange whose sign is set by the local wind alignment, not the stochastic friction coefficient of the resolved swell mode derived from the Green-Kubo projection in Section S2. For  $U_{10} = 10 \text{ m s}^{-1}$  and swell wavenumber  $k \approx 0.02 \text{ m}^{-1}$ ,  $u_*^{(w)} \approx 1.2 \times 10^{-2} \text{ m s}^{-1}$  and  $|\mu_{\text{CL}}^{(\text{qs})}| \sim 2 \times 10^{-8} \text{ m}^{-1}$ -comparable to or smaller than  $\mu_{\text{SVF}}$ .

For remote swell, the propagation direction is fixed by a distant storm and is only weakly correlated with the local wind direction. The angle  $\Delta\theta$  therefore varies broadly along a trans-oceanic path, so the path-mean quasi-steady CL contribution is expected to be small owing to sign cancellations, although systematic biases from wind climatology cannot be excluded. Along any individual ray, the CL term need not vanish. Rather, it acts as a low-frequency, signed modulation on synoptic scales, not as the encounter-scale stochastic friction addressed by the SVF theory.

A heuristic encounter-scale force comparison supports the same ordering. Using  $u_s \sim a^2 \omega k$  and  $u_\phi \sim a\omega$ , the force ratio scales as

$$\frac{|u_s \Omega|}{|u_\phi \omega'|} \sim ak \frac{\Omega}{\omega'}. \quad (\text{S.239})$$

For typical remote swell,  $ak \sim 10^{-2}$ - $10^{-1}$ , so unless the mean-flow vorticity greatly exceeds the turbulent vorticity fluctuation, the CL force is subdominant at the encounter scale. We stress that this is only a scale argument. The cleaner distinction is the one above. The quasi-steady CL exchange is signed and low-frequency, whereas the SVF attenuation is positive-definite and arises from the autocorrelation of the mode-projected stochastic force.

For representative far-field conditions ( $T \approx 14 \text{ s}$ ,  $\varepsilon_{\text{eff}} \sim 5 \times 10^{-7} \text{ m}^2 \text{ s}^{-3}$ ), the SVF law gives  $\mu_{\text{SVF}} \sim 0.5$ - $1 \times 10^{-7} \text{ m}^{-1}$ . The SVF channel is amplitude-independent (Section S8), not signed by the local wind-swell alignment, and positive-definite ( $\mu_{\text{SVF}} > 0$  always, by Theorem 1). We therefore regard remote swell as the regime in which breaking is suppressed and the quasi-steady CL modulation is sufficiently small that the SVF Green-Kubo friction can be isolated and tested. Within the present non-breaking, mode-level bulk-turbulence framework, SVF is the sole retained positive-definite stochastic friction channel for remote swell. Table S5 collects the numerical comparison, including the laminar air-viscous baseline. The classical upper limit for swell decay by laminar air-side viscous shearing [70, 71] is  $\mu_v = (\rho_a/\rho_w g c_g)(2\pi/T)^{5/2} \sqrt{2\nu_{\text{air}}}$ . For 10 s swell this gives  $\mu_v \approx 3 \times 10^{-8} \text{ m}^{-1}$ . For the 14-18 s period range typical of trans-oceanic swell,  $\mu_v$  drops to  $(3$ - $5) \times 10^{-9} \text{ m}^{-1}$ , an order of magnitude below the SVF prediction (Table S5). Because  $\mu_v \propto \omega^{7/2}$  decays faster with period than  $\mu_E \propto \omega^{8/3}$ , the SVF-to-viscous ratio grows as  $T^{5/6}$  and the laminar channel is negligible throughout the remote-swell band. Even if the air-side

**Table S5:** Representative wave-energy exchange channels. Within the present non-breaking, mode-level bulk-turbulence framework, SVF is the sole retained positive-definite stochastic friction channel for remote swell. The laminar air-viscous rate [70] is included as a baseline.

| Channel                                   | Dominant regime | Sign  | Typical $\mu$ ( $\text{m}^{-1}$ )       |
|-------------------------------------------|-----------------|-------|-----------------------------------------|
| Breaking                                  | Wind sea        | $> 0$ | $10^{-5}$ - $10^{-4}$                   |
| Laminar air viscosity (Dore) <sup>a</sup> | All             | $> 0$ | $3 \times 10^{-9}$ - $3 \times 10^{-8}$ |
| CL/Langmuir quasi-steady exchange         | Remote swell    | $\pm$ | expected small in path mean             |
| SVF                                       | Remote swell    | $> 0$ | $0.5$ - $1 \times 10^{-7}$              |

<sup>a</sup>Laminar (Stokes) solution [70, 71]. Even if the air-side boundary layer becomes turbulent at high orbital Reynolds number, available estimates still place the resulting enhancement well below the observed mean attenuation [18].

boundary layer becomes turbulent at high orbital Reynolds number, available estimates still place the resulting enhancement well below the observed mean attenuation [18, 71]. That the observed mean rate  $\bar{\mu}_{\text{obs}} \sim 1.5 \times 10^{-7} \text{ m}^{-1}$  [61] exceeds the Dore laminar ceiling by a factor of  $\sim 5$  was the original motivation for invoking turbulent mechanisms [18]. The SVF theory supplies the first zero-parameter, first-principles account of that turbulent excess.

## References

- [1] G. K. Batchelor. *An Introduction to Fluid Dynamics*. Cambridge University Press, 1967.
- [2] Anqing Xuan, Bing-Qing Deng, and Lian Shen. Effect of an incoming Gaussian wave packet on underlying turbulence. *J. Fluid Mech.*, 999:A45, 2024.
- [3] O. M. Phillips. *The Dynamics of the Upper Ocean*. Cambridge University Press, 2nd edition, 1977.
- [4] J. Lighthill. *Waves in Fluids*. Cambridge University Press, 1978.
- [5] C. C. Mei, M. Stiassnie, and D. K.-P. Yue. *Theory and Applications of Ocean Surface Waves*. World Scientific, 2005.
- [6] J. C. McWilliams. *Quasi-linear Theory for Surface Wave–Current Interactions*. Springer, 2022.
- [7] A. D. D. Craik and S. Leibovich. A rational model for Langmuir circulations. *J. Fluid Mech.*, 73:401–426, 1976.
- [8] S. Leibovich. *On wave-current interaction theories of Langmuir circulations*, volume 99. 1980.
- [9] D. D. Holm. The ideal Craik–Leibovich equations. *Physica D*, 98:415–441, 1996.
- [10] J. C. McWilliams, P. P. Sullivan, and C.-H. Moeng. Langmuir turbulence in the ocean. *J. Fluid Mech.*, 334:1–30, 1997.
- [11] P. P. Sullivan, J. C. McWilliams, and W. K. Melville. Surface gravity wave effects in the oceanic boundary layer: Large-eddy simulation with vortex force and stochastic breakers. *J. Fluid Mech.*, 593:405–452, 2007.
- [12] P. P. Sullivan and J. C. McWilliams. Dynamics of winds and currents coupled to surface waves. *Annu. Rev. Fluid Mech.*, 42:19–42, 2010.
- [13] Yasushi Fujiwara, Yutaka Yoshikawa, and Yoshimasa Matsumura. A wave-resolving simulation of Langmuir circulations with a nonhydrostatic free-surface model: Comparison with Craik–Leibovich theory and an alternative Eulerian view of the driving mechanism. *J. Phys. Oceanogr.*, 48:1691–1708, 2018.
- [14] M. S. Green. Markoff random processes and the statistical mechanics of time-dependent phenomena. II. Irreversible processes in fluids. *J. Chem. Phys.*, 22(3):398–413, 1954.
- [15] R. Kubo. Statistical-mechanical theory of irreversible processes. I. General theory and simple applications to magnetic and conduction problems. *J. Phys. Soc. Jpn.*, 12(6):570–586, 1957.

- [16] S. Bochner. *Vorlesungen über Fouriersche Integrale*. Akademische Verlagsgesellschaft, Leipzig, 1933.
- [17] F. E. Snodgrass, G. W. Groves, K. F. Hasselmann, G. R. Miller, W. H. Munk, and W. H. Powers. Propagation of ocean swell across the Pacific. *Phil. Trans. R. Soc. Lond. A*, 259: 431–497, 1966.
- [18] F. Ardhuin, B. Chapron, and F. Collard. Observation of swell dissipation across oceans. *Geophys. Res. Lett.*, 36:L06607, 2009. doi: 10.1029/2008GL037030.
- [19] Justin E. Stopa, Fabrice Ardhuin, Romain Husson, Haoyu Jiang, Bertrand Chapron, and Fabrice Collard. Swell dissipation from 10 years of Envisat advanced synthetic aperture radar in wave mode. *Geophys. Res. Lett.*, 43:3423–3430, 2016. doi: 10.1002/2015GL067566.
- [20] Peter D. Craig and Michael L. Banner. Modeling wave-enhanced turbulence in the ocean surface layer. *J. Phys. Oceanogr.*, 24(12):2546–2559, 1994. doi: 10.1175/1520-0485(1994)024<2546:MWETIT>2.0.CO;2.
- [21] E. A. Terray, M. A. Donelan, Y. C. Agrawal, W. M. Drennan, K. K. Kahma, III A. J. Williams, P. A. Hwang, and S. A. Kitaigorodskii. Estimates of kinetic energy dissipation under breaking waves. *J. Phys. Oceanogr.*, 26(5):792–807, 1996. doi: 10.1175/1520-0485(1996)026<0792:EOKEDU>2.0.CO;2.
- [22] Stephen E. Belcher, Alan L. M. Grant, Kirsty E. Hanley, Baylor Fox-Kemper, Luke Van Roekel, Peter P. Sullivan, William G. Large, Andy Brown, Adrian Hines, Daley Calvert, Anna Rutgersson, Heidi Pettersson, Jean-Raymond Bidlot, Peter A. E. M. Janssen, and Jeff A. Polton. A global perspective on Langmuir turbulence in the ocean surface boundary layer. *Geophys. Res. Lett.*, 39(18):L18605, 2012. doi: 10.1029/2012GL052932.
- [23] B. J. Alder and T. E. Wainwright. Decay of the velocity autocorrelation function. *Physical Review A*, 1(1):18–21, 1970. doi: 10.1103/PhysRevA.1.18.
- [24] Adrean Webb and Baylor Fox-Kemper. Wave spectral moments and Stokes drift estimation. *Ocean Modelling*, 40:273–288, 2011. doi: 10.1016/j.ocemod.2011.08.007.
- [25] H. Mori. Transport, collective motion, and Brownian motion. *Prog. Theor. Phys.*, 33: 423–455, 1965.
- [26] R. Zwanzig. *Nonequilibrium Statistical Mechanics*. Oxford University Press, 2001.
- [27] Denis J. Evans and Gary P. Morriss. *Statistical Mechanics of Nonequilibrium Liquids*. Cambridge University Press, Cambridge, 2nd edition, 2008. doi: 10.1017/CBO9780511535307.
- [28] Umberto Marini Bettolo Marconi, Andrea Puglisi, Lamberto Rondoni, and Angelo Vulpiani. Fluctuation–dissipation: Response theory in statistical physics. *Physics Reports*, 461(4–6): 111–195, 2008. doi: 10.1016/j.physrep.2008.02.002.
- [29] Ming Han, Michel Fruchart, Colin Scheibner, Suriyanarayanan Vaikuntanathan, Juan J. de Pablo, and Vincenzo Vitelli. Fluctuating hydrodynamics of chiral active fluids. *Nature Physics*, 17:1260–1269, 2021. doi: 10.1038/s41567-021-01360-7.
- [30] É. Fodor, C. Nardini, M. E. Cates, J. Tailleur, P. Visco, and F. van Wijland. How far from equilibrium is active matter? *Phys. Rev. Lett.*, 117:038103, 2016.
- [31] Jean-Pierre Hansen and Ian R. McDonald. *Theory of Simple Liquids: With Applications to Soft Matter*. Academic Press, Oxford, 4th edition, 2013. ISBN 978-0-12-387032-2. doi: 10.1016/C2010-0-66723-X.
- [32] A. N. Kolmogorov. The local structure of turbulence in incompressible viscous fluid for very large Reynolds numbers. *Dokl. Akad. Nauk SSSR*, 30:301–304, 1941.
- [33] James R. Holton and Gregory J. Hakim. *An Introduction to Dynamic Meteorology*, volume 88 of *International Geophysics Series*. Academic Press, Amsterdam, 5th edition, 2013. ISBN 978-0-12-384866-6.
- [34] H. Jiang, J. E. Stopa, H. Wang, R. Husson, A. Mouche, B. Chapron, and G. Chen. Tracking the attenuation and nonbreaking dissipation of swells using altimeters. *J. Geophys. Res. Oceans*, 121:1446–1458, 2016.
- [35] F. Ardhuin and A. D. Jenkins. On the interaction of surface gravity waves and upper ocean

- turbulence. *J. Phys. Oceanogr.*, 36:551–557, 2006.
- [36] G. K. Batchelor. *The Theory of Homogeneous Turbulence*. Cambridge University Press, Cambridge, 1953.
- [37] S. B. Pope. *Turbulent Flows*. Cambridge University Press, 2000.
- [38] Ayal Anis and James N. Moum. Surface wave–turbulence interactions: Scaling  $\varepsilon(z)$  near the sea surface. *J. Phys. Oceanogr.*, 25:2025–2045, 1995. doi: 10.1175/1520-0485(1995)025<2025:SWISNT>2.0.CO;2.
- [39] Zhihua Zheng, Ramsey L. Harcourt, and Eric A. D’Asaro. Evaluating Langmuir turbulence parameterizations in the ocean surface boundary layer. *J. Geophys. Res. Oceans*, 126:e2020JC016325, 2021. doi: 10.1029/2020JC016325.
- [40] F. P. Bretherton and C. J. R. Garrett. Wavetrains in inhomogeneous moving media. *Proc. R. Soc. Lond. A*, 302:529–554, 1968. doi: 10.1098/rspa.1968.0034.
- [41] M. A. C. Teixeira and S. E. Belcher. On the distortion of turbulence by a progressive surface wave. *J. Fluid Mech.*, 458:229–267, 2002.
- [42] H. Tennekes and J. L. Lumley. *A First Course in Turbulence*. MIT Press, Cambridge, MA, 1972.
- [43] H. Tennekes. Eulerian and Lagrangian time microscales in isotropic turbulence. *J. Fluid Mech.*, 67:561–567, 1975.
- [44] R. H. Kraichnan. Kolmogorov’s hypotheses and Eulerian turbulence theory. *Phys. Fluids*, 7:1723–1734, 1964.
- [45] K. R. Sreenivasan. On the universality of the Kolmogorov constant. *Phys. Fluids*, 7:2778–2784, 1995.
- [46] E. A. D’Asaro. Turbulent vertical kinetic energy in the ocean mixed layer. *J. Phys. Oceanogr.*, 31:3530–3537, 2001.
- [47] S. A. Thorpe. Langmuir circulation. *Annu. Rev. Fluid Mech.*, 36:55–79, 2004.
- [48] K. R. Sreenivasan and R. A. Antonia. The phenomenology of small-scale turbulence. *Annu. Rev. Fluid Mech.*, 29:435–472, 1997.
- [49] J. B. Edson et al. On the exchange of momentum over the open ocean. *J. Phys. Oceanogr.*, 43:1589–1610, 2013.
- [50] W. G. Large and S. Pond. Open ocean momentum flux measurements in moderate to strong winds. *J. Phys. Oceanogr.*, 11:324–336, 1981. doi: 10.1175/1520-0485(1981)011<0324:OOMFMI>2.0.CO;2.
- [51] S. D. Smith. Wind stress and heat flux over the ocean in gale force winds. *J. Phys. Oceanogr.*, 10:709–726, 1980. doi: 10.1175/1520-0485(1980)010<0709:WSAHFO>2.0.CO;2.
- [52] J. Wu. Wind-stress coefficients over sea surface from breeze to hurricane. *J. Geophys. Res.*, 87(C12):9704–9706, 1982. doi: 10.1029/JC087iC12p09704.
- [53] J. Thomson, M. S. Schwendeman, S. F. Zippel, S. Moghimi, J. Gemmrich, and W. E. Rogers. Wave-breaking turbulence in the ocean surface layer. *J. Phys. Oceanogr.*, 46:1857–1870, 2016. doi: 10.1175/JPO-D-15-0130.1.
- [54] P. Sutherland and W. K. Melville. Field measurements of surface and near-surface turbulence in the presence of breaking waves. *J. Phys. Oceanogr.*, 45:943–965, 2015. doi: 10.1175/JPO-D-14-0133.1.
- [55] E. Kunze. A unified model spectrum for anisotropic stratified and isotropic turbulence in the ocean and atmosphere. *J. Phys. Oceanogr.*, 49:385–407, 2019.
- [56] J. M. Klymak and J. N. Moum. Oceanic isopycnal slope spectra. Part II: Turbulence. *J. Phys. Oceanogr.*, 37:1232–1245, 2007.
- [57] G. D. Nastrom and K. S. Gage. A climatology of atmospheric wavenumber spectra of wind and temperature observed by commercial aircraft. *J. Atmos. Sci.*, 42:950–960, 1985.
- [58] E. Lindborg. The energy cascade in a strongly stratified fluid. *J. Fluid Mech.*, 550:207–242, 2006.
- [59] G. Brethouwer, P. Billant, E. Lindborg, and J.-M. Chomaz. Scaling analysis and simulation

- of strongly stratified turbulent flows. *J. Fluid Mech.*, 585:343–368, 2007.
- [60] T. Ishihara, T. Gotoh, and Y. Kaneda. Study of high-Reynolds number isotropic turbulence by direct numerical simulation. *Annu. Rev. Fluid Mech.*, 41:165–180, 2009.
- [61] H. Jiang, A. Mouche, H. Wang, A. Babanin, B. Chapron, and G. Chen. Limitation of the altimeter-derived swell attenuation: An example of swell propagation from the Southern Ocean. *Remote Sens. Environ.*, 200:244–253, 2017. doi: 10.1016/j.rse.2017.08.004.
- [62] S. A. Thorpe. Langmuir circulation. *Annual Review of Fluid Mechanics*, 36:55–79, 2004. doi: 10.1146/annurev.fluid.36.052203.071431.
- [63] Eric A. D’Asaro. Turbulence in the upper-ocean mixed layer. *Annual Review of Marine Science*, 6:101–115, 2014. doi: 10.1146/annurev-marine-010213-135138.
- [64] S. Zieger, A. V. Babanin, W. E. Rogers, and I. R. Young. Observation-based source terms in the third-generation wave model WAVEWATCH. *Ocean Model.*, 96:2–25, 2015.
- [65] Qingxiang Liu, W. Erick Rogers, Alexander V. Babanin, Ian R. Young, Leonel Romero, Stefan Zieger, Fangli Qiao, and Changlong Guan. Observation-based source terms in the third-generation wave model WAVEWATCH III: Updates and verification. *J. Phys. Oceanogr.*, 49:489–517, 2019. doi: 10.1175/JPO-D-18-0137.1.
- [66] Alexander V. Babanin. *Breaking and Dissipation of Ocean Surface Waves*. Cambridge University Press, 2011. doi: 10.1017/CBO9780511736162.
- [67] W. K. Melville. The role of surface-wave breaking in air–sea interaction. *Annu. Rev. Fluid Mech.*, 28:279–321, 1996.
- [68] O. M. Phillips. Spectral and statistical properties of the equilibrium range in wind-generated gravity waves. *J. Fluid Mech.*, 156:505–531, 1985.
- [69] O. M. Phillips. The equilibrium range in the spectrum of wind-generated waves. *J. Fluid Mech.*, 4(4):426–434, 1958. doi: 10.1017/S0022112058000550.
- [70] B. D. Dore. Some effects of the air-water interface on gravity waves. *Geophysical & Astrophysical Fluid Dynamics*, 10(1):215–230, 1978. doi: 10.1080/03091927808242638.
- [71] F. Collard, F. Ardhuin, and B. Chapron. Monitoring and analysis of ocean swell fields from space: New methods for routine observations. *J. Geophys. Res.*, 114:C07023, 2009. doi: 10.1029/2008JC005215.
